# Supplementary material for: Catalytic [2,3]-sigmatropic rearrangement of sulfonium ylides derived from azoalkenes: non-carbenoid Doyle–Kirmse reaction
Source: Royal Society of Chemistry journal article supplement (doi:10.1039/d3cc00160a), 2023-01-01
Supplement: d3cc00160a1.pdf [file d3cc00160a1.pdf]

## *Supplementary Information*

### **Catalytic [2,3]-sigmatropic rearrangement of sulfonium ylides derived from azoalkenes: non-carbenoid Doyle–Kirmse reaction**

Fu-Yuan Yang, Tian-Jiao Han, Shi-Kun Jia, Min-Can Wang, and Guang-Jian Mei\*

*Green Catalysis Center, and College of Chemistry, Zhengzhou University, Zhengzhou 450001,  
China.*

\*E-mail: [meigj@zzu.edu.cn](mailto:meigj@zzu.edu.cn)

## **Contents**

|                                                                 |           |
|-----------------------------------------------------------------|-----------|
| <u>1. General Methods.....</u>                                  | <u>2</u>  |
| <u>2. Reaction optimization.....</u>                            | <u>3</u>  |
| <u>3. Representative Procedures.....</u>                        | <u>4</u>  |
| <u>4. Characterization of Products.....</u>                     | <u>7</u>  |
| <u>5. X-ray single crystal data for compound <b>3a</b>.....</u> | <u>19</u> |
| <u>6. NMR Spectra.....</u>                                      | <u>21</u> |
| <u>7. References.....</u>                                       | <u>59</u> |

## 1. General Methods

Unless otherwise specified, all reactions were conducted under an inert atmosphere and anhydrous conditions. All the solvents were purified according to the standard procedures. All chemicals which are commercially available were employed without further purification. Thin - layer chromatography (TLC) was performed on silica gel plates (60F - 254) using UV - light (254 nm). Flash chromatography was conducted on silica gel (200–300 mesh).  $^1\text{H}$  and  $^{13}\text{C}$  NMR spectra were recorded at ambient temperature in  $\text{CDCl}_3$  on a 400 MHz NMR spectrometer. Chemical shifts were reported in parts per million (ppm). The data are reported as follows: for  $^1\text{H}$  NMR, chemical shift in ppm from tetramethylsilane with the solvent as internal standard ( $\text{CDCl}_3$   $\delta$  7.26 ppm), multiplicity (s = singlet, d = doublet, t = triplet, q = quartet, m = multiplet or overlap of non-equivalent resonances), integration; for  $^{13}\text{C}$  NMR, chemical shift in ppm from tetramethylsilane with the solvent as internal indicator ( $\text{CDCl}_3$   $\delta$  77.1 ppm), multiplicity with respect to protons. All high-resolution mass spectra were obtained on a Q-TOF Micro LC/MS System ESI spectrometer to be given in m/z. Azoalkenes **1** were either employed directly from commercial sources or prepared according to the literature<sup>1</sup>; thioethers **2** were synthesized according to modified literature-reported procedures<sup>2-3</sup>.

## 2. Reaction optimization<sup>a</sup>

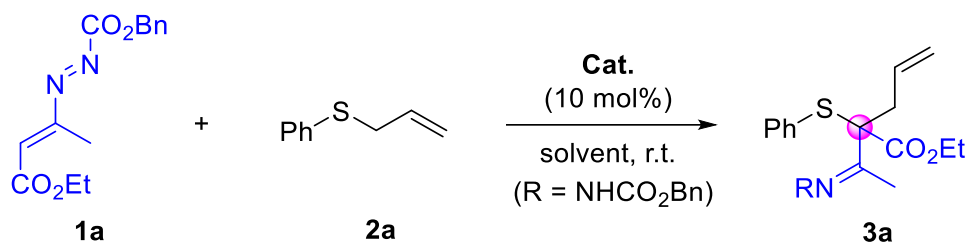

| Entry | Cat.                      | Solvent                  | Additive | Yield (%) <sup>b</sup> |
|-------|---------------------------|--------------------------|----------|------------------------|
| 1     | $\text{Cu}(\text{OTf})_2$ | $\text{CH}_2\text{Cl}_2$ | -        | 64                     |
| 2     | $\text{Ni}(\text{OTf})_2$ | $\text{CH}_2\text{Cl}_2$ | -        | n.r.                   |
| 3     | $\text{Fe}(\text{OTf})_3$ | $\text{CH}_2\text{Cl}_2$ | -        | 58                     |
| 4     | $\text{In}(\text{OTf})_3$ | $\text{CH}_2\text{Cl}_2$ | -        | 34                     |
| 5     | $\text{Sc}(\text{OTf})_3$ | $\text{CH}_2\text{Cl}_2$ | -        | 88                     |
| 6     | MsOH                      | $\text{CH}_2\text{Cl}_2$ | -        | 41                     |
| 7     | $\text{HNTf}_2$           | $\text{CH}_2\text{Cl}_2$ | -        | 30                     |
| 8     | PA                        | $\text{CH}_2\text{Cl}_2$ | -        | Trace                  |
| 9     | $\text{Sc}(\text{OTf})_3$ | $\text{CH}_3\text{CN}$   | -        | 87                     |
| 10    | $\text{Sc}(\text{OTf})_3$ | toluene                  | -        | 51                     |
| 11    | $\text{Sc}(\text{OTf})_3$ | THF                      | -        | 39                     |
| 12    | $\text{Sc}(\text{OTf})_3$ | $\text{CH}_2\text{Cl}_2$ | 3Å MS    | 44                     |
| 13    | $\text{Sc}(\text{OTf})_3$ | $\text{CH}_2\text{Cl}_2$ | 4Å MS    | 52                     |
| 14    | $\text{Sc}(\text{OTf})_3$ | $\text{CH}_2\text{Cl}_2$ | 5Å MS    | 70                     |

<sup>a</sup>Reaction conditions: **1a** (0.12 mmol), **2a** (0.1 mmol), and **Cat.** (10 mol%) in the solvent specified (1 mL) at room temperature (r.t.) for 3d, n.r. = no reaction. <sup>b</sup>Isolated yields. PA = diphenyl phosphate.

### 3. Representative Procedures

#### General Procedures for the synthesis of target products 3

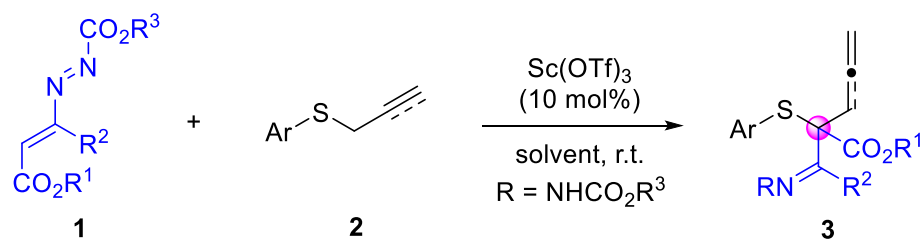

Azoalkenes **1** (0.24 mmol) and thioethers **2** (0.2 mmol) (ratio of **1:2** = 1.2:1) were dissolved in CH<sub>2</sub>Cl<sub>2</sub> (**3a-3y**) or CH<sub>3</sub>CN (**3z-3c'**) and Sc(OTf)<sub>3</sub> (10 mol%) was added. The reaction mixture was stirred for 3 days at room temperature. After the completion of the reaction which was indicated by TLC, the solvents were removed in vacuo and the crude product was separated by flash column chromatography on silica gel (petroleum ether / ethyl acetate 8:1–4:1) to afford the target products **3**.

#### Procedure for the gram-scale reaction

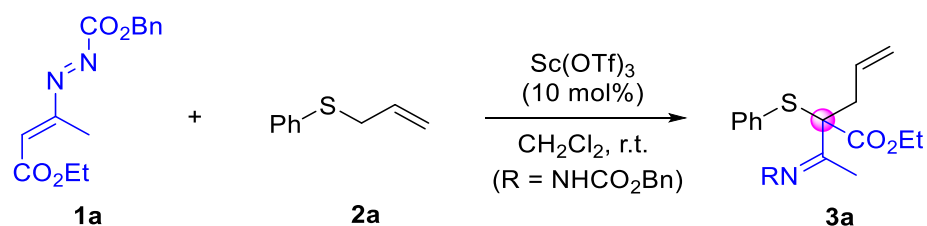

Azoalkene **1a** (1.04 g, 3.6 mmol), thioether **2a** (0.45 g, 3.0 mmol) were dissolved in CH<sub>2</sub>Cl<sub>2</sub> and Sc(OTf)<sub>3</sub> (10 mol%) was added. The reaction mixture was stirred for 3 days at room temperature. After the completion of the reaction which was indicated by TLC, H<sub>2</sub>O was added followed by extraction with CH<sub>2</sub>Cl<sub>2</sub>. The organic phase was dried on anhydrous sodium sulphate and evaporated under reduced pressure. The crude product was separated by flash column chromatography on silica gel (petroleum ether / ethyl acetate = 8:1 – 4:1) to afford the target products **3a** (1.12 g, 88% yield) as a white solid.

#### Derivatization of 3a and 3y into compounds 4-9

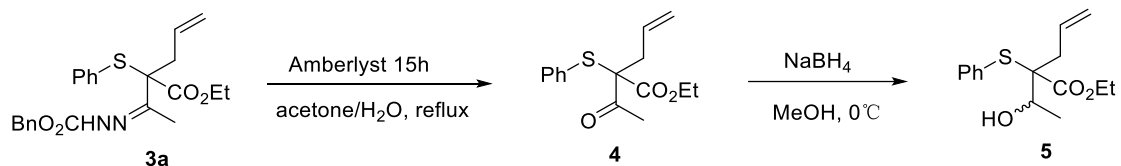

Compound **3a** (85.2 mg, 0.2 mmol) was refluxed in 10 mL of acetone/water (9:1 mixture) in the presence of Amberlyst-15h (100 mg) for 3 days (TLC check). The reaction mixture was filtered off and the solution was concentrated under reduced

pressure and then extracted with ethyl acetate. The organic phase was dried on anhydrous sodium sulphate and evaporated under reduced pressure. The crude reaction mixture was purified by flash chromatography eluting with petroleum ether / ethyl acetate (10:1) mixtures to obtain ketone derivative **4** (37.8 mg, 68% yield) as a yellow oil.

To a stirred suspension of ketone derivative **4** (55.6 mg, 0.2 mmol, 1.0 equiv) in MeOH (5 mL) at 0 °C, NaBH<sub>4</sub> (11.4 mg, 0.3 mmol, 1.5 equiv) was slowly added. The resulting mixture was stirred at room temperature for 30 min. MeOH was removed under reduced pressure, and the residue was purified by flash chromatography (petroleum ether / ethyl acetate = 10:1) to afford alcohol **5** (54.3 mg, 97% yield, 4:1 dr) as a yellow oil.

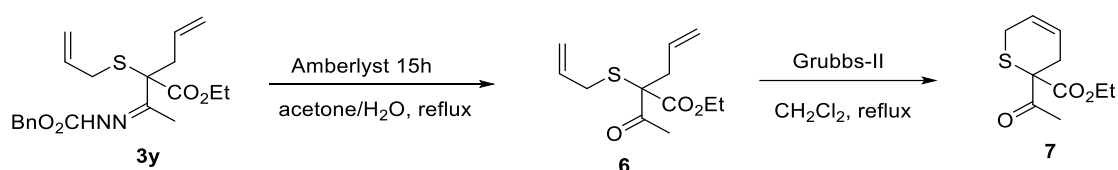

Compound **3y** (78.0 mg, 0.2 mmol) was refluxed in 10 mL of acetone/water (9:1 mixture) in the presence of Amberlyst-15h (100 mg) for 7 days (TLC check). The reaction mixture was filtered off and the solution was concentrated under reduced pressure and then extracted with ethyl acetate. The organic phase was dried on anhydrous sodium sulphate and evaporated under reduced pressure. The crude reaction mixture was purified by flash chromatography eluting with petroleum ether / ethyl acetate (10:1) mixtures to obtain ketone derivative **6** (29.0 mg, 60% yield) as a yellow oil.

Ketone derivative **6** (48.4 mg, 0.2 mmol, 1.0 equiv), and Grubbs catalyst II (25.5 mg, 0.03 mmol, 15 mol%) were dissolved in CH<sub>2</sub>Cl<sub>2</sub> (5 mL). The reaction mixture was stirred at 40 °C for 2 h, which was directly purified by flash column chromatography (petroleum ether / ethyl acetate = 10:1) to afford the title product **7** (39.4 mg, 92% yield) as a brown oil.

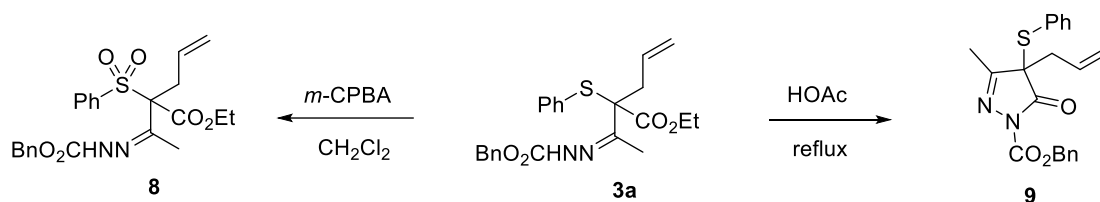

Compound **3a** (85.2 mg, 0.2 mmol) was dissolved in CH<sub>2</sub>Cl<sub>2</sub> (5 mL), then *m*-CPBA (103.2 mg, 0.6 mmol, 3.0 equiv) was added. The reaction mixture was stirred at room temperature for 1h. After the completion of the reaction which was indicated by TLC, saturated NaHCO<sub>3</sub> aqueous solution was added followed by extraction with CH<sub>2</sub>Cl<sub>2</sub>. The organic phase was dried on anhydrous sodium sulphate and evaporated under reduced pressure. The crude product was separated by flash column chromatography on silica gel (petroleum ether / ethyl acetate = 2:1) to afford the sulfone derivative **8** (74.2 mg, 81% yield) as a yellow oil.

Compound **3a** (85.2 mg, 0.2 mmol) was dissolved in acetic acid (5 mL). The reaction mixture was refluxed at 130°C for 2h. After the completion of the reaction which was indicated by TLC, saturated NaHCO<sub>3</sub> aqueous solution was added followed by extraction with ethyl acetate. The organic phase was dried on anhydrous sodium sulphate and evaporated under reduced pressure. The crude product was separated by flash column chromatography on silica gel (petroleum ether / ethyl acetate = 2:1) to afford the title product **9** (49.4 mg, 65% yield) as a red oil.

### 3. Characterization of Products

Benzyl-2-(3-(ethoxycarbonyl)-3-(phenylthio)hex-5-en-2-ylidene)hydrazine-1-carboxylate 3a:

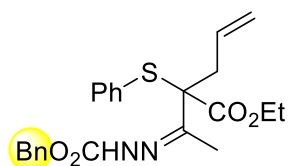

A white solid; 74.9 mg; isolated yield = 88%; m.p. 123.2-123.6°C;  $^1\text{H}$  NMR (400 MHz,  $\text{CDCl}_3$ )  $\delta$  7.87 (s, 1H), 7.52 – 7.05 (m, 10H), 6.26 – 5.85 (m, 1H), 5.31 – 4.96 (m, 4H), 4.16 – 4.22 (m, 2H), 3.04 – 2.52 (m, 2H), 1.90 (s, 3H), 1.23 (t,  $J = 7.1$  Hz, 3H);  $^{13}\text{C}$  NMR (100 MHz,  $\text{CDCl}_3$ )  $\delta$  170.0, 153.4, 147.7, 136.8, 135.9, 133.4, 130.0, 129.5, 128.7, 128.6, 128.3, 118.5, 68.0, 67.3, 62.2, 38.4, 14.5, 14.2; HRMS (ESI)  $m/z$  calcd for  $\text{C}_{23}\text{H}_{27}\text{N}_2\text{O}_4\text{S}^+$  [ $\text{M} + \text{H}$ ] $^+ = 427.1686$ , found = 427.1690.

Methyl-2-(3-(ethoxycarbonyl)-3-(phenylthio)hex-5-en-2-ylidene)hydrazine-1-carboxylate 3b:

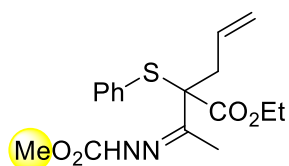

A white solid; 53.2 mg; isolated yield = 76%; m.p. 121.3-121.8°C;  $^1\text{H}$  NMR (400 MHz,  $\text{CDCl}_3$ )  $\delta$  8.03 (s, 1H), 7.52 – 6.99 (m, 5H), 5.99 – 6.05 (m, 1H), 5.20 – 4.99 (m, 2H), 4.18 – 4.22 (m, 2H), 3.74 (s, 3H), 2.92 – 2.60 (m, 2H), 1.93 – 2.25 (m, 3H), 1.25 (t,  $J = 7.1$  Hz, 3H);  $^{13}\text{C}$  NMR (100 MHz,  $\text{CDCl}_3$ )  $\delta$  170.0, 154.5, 147.7, 136.9, 133.3, 130.0, 129.5, 128.7, 118.5, 67.8, 62.1, 52.9, 38.2, 14.5, 14.2; HRMS (ESI)  $m/z$  calcd for  $\text{C}_{17}\text{H}_{23}\text{N}_2\text{O}_4\text{S}^+$  [ $\text{M} + \text{H}$ ] $^+ = 351.1373$ , found = 351.1369.

Ethyl-2-(3-(ethoxycarbonyl)-3-(phenylthio)hex-5-en-2-ylidene)hydrazine-1-carboxylate 3c:

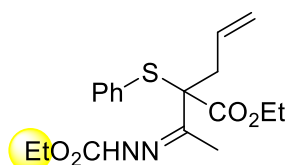

A yellow solid; 53.8 mg; isolated yield = 74%; m.p. 119.2-119.9°C;  $^1\text{H}$  NMR (400 MHz,  $\text{CDCl}_3$ )  $\delta$  7.83 (s, 1H), 7.50 – 7.10 (m, 5H), 5.99 – 6.08 (m, 1H), 5.25 – 5.01 (m, 2H), 4.40 – 4.02 (m, 4H), 2.98 – 2.59 (m, 2H), 1.93 – 2.25 (m, 3H), 1.23 – 1.27 (m, 6H);  $^{13}\text{C}$  NMR (100 MHz,  $\text{CDCl}_3$ )  $\delta$  170.0, 153.8, 147.3, 136.8, 133.4, 130.1, 129.5, 128.7, 118.5, 67.9, 62.1, 61.8, 38.3, 14.5, 14.4, 14.2; HRMS (ESI)  $m/z$  calcd for  $\text{C}_{18}\text{H}_{25}\text{N}_2\text{O}_4\text{S}^+$  [ $\text{M} + \text{H}$ ] $^+ = 365.1530$ , found = 365.1529.

(9H-fluoren-9-yl)methyl-2-(3-(ethoxycarbonyl)-3-(phenylthio)hex-5-en-2-ylidene)hydrazine-1-carboxylate **3d**, R = fluorenylmethyl:

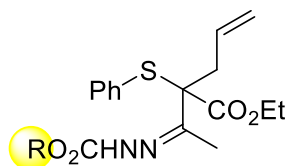

A white solid; 93.5 mg; isolated yield = 91%; m.p. 124.8-125.4°C;  $^1\text{H}$  NMR (400 MHz,  $\text{CDCl}_3$ )  $\delta$  8.28 (s, 1H), 7.74 – 7.76 (m, 2H), 7.68 – 7.54 (m, 2H), 7.36 – 7.41 (m, 4H), 7.34 – 7.22 (m, 5H), 6.29 – 5.94 (m, 1H), 5.15 (d,  $J = 12.3$  Hz, 2H), 4.48 (m, 1H), 4.40 – 4.29 (s, 1H), 4.28 – 3.99 (m, 3H), 2.85 (m, 2H), 1.97 (s, 3H), 1.26 (t,  $J = 7.1$  Hz, 3H);  $^{13}\text{C}$  NMR (100 MHz,  $\text{CDCl}_3$ )  $\delta$  170.1, 154.9, 147.9, 143.8, 143.5, 141.4, 141.3, 137.0, 133.5, 130.2, 129.5, 128.8, 127.8, 127.8, 127.1, 127.1, 125.4, 120.0, 120.0, 118.6, 68.0, 67.8, 62.2, 46.9, 38.5, 14.7, 14.3; HRMS (ESI)  $m/z$  calcd for  $\text{C}_{30}\text{H}_{31}\text{N}_2\text{O}_4\text{S}^+$   $[\text{M} + \text{H}]^+ = 515.1999$ , found = 515.2004.

Methyl-2-(3-(methoxycarbonyl)-3-(phenylthio)hex-5-en-2-ylidene)hydrazine-1-carboxylate **3e**:

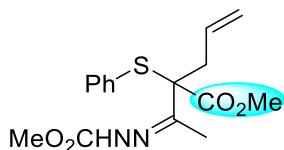

A white solid; 45.7 mg; isolated yield = 68%; m.p. 130.4-130.9°C;  $^1\text{H}$  NMR (400 MHz,  $\text{CDCl}_3$ )  $\delta$  8.18 (s, 1H), 7.51 – 7.08 (m, 5H), 6.21 – 5.85 (m, 1H), 5.27 – 4.82 (m, 2H), 3.98 – 3.49 (m, 6H), 2.63 – 2.82 (m, 2H), 1.92 (s, 3H);  $^{13}\text{C}$  NMR (100 MHz,  $\text{CDCl}_3$ )  $\delta$  170.5, 154.7, 147.6, 136.9, 133.3, 130.0, 129.5, 128.7, 118.5, 67.9, 52.9, 52.8, 38.3, 14.6; HRMS (ESI)  $m/z$  calcd for  $\text{C}_{16}\text{H}_{21}\text{N}_2\text{O}_4\text{S}^+$   $[\text{M} + \text{H}]^+ = 337.1217$ , found = 337.1212.

Benzyl-2-(3-((benzyloxy)carbonyl)-3-(phenylthio)hex-5-en-2-ylidene)hydrazine-1-carboxylate **3f**:

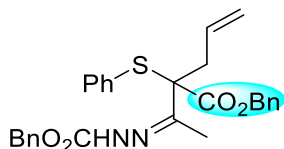

A yellow oil; 70.3 mg; isolated yield = 72%;  $^1\text{H}$  NMR (400 MHz,  $\text{CDCl}_3$ )  $\delta$  7.65 (s, 1H), 7.46 – 7.13 (m, 15H), 5.95 – 6.05 (m, 1H), 5.34 – 4.77 (m, 6H), 2.66 – 2.89 (m, 2H), 1.80 – 2.23 (m, 3H);  $^{13}\text{C}$  NMR (100 MHz,  $\text{CDCl}_3$ )  $\delta$  170.0, 153.6, 147.2, 136.9, 135.9, 135.0, 133.2, 129.9, 129.5, 128.8, 128.7, 128.6, 128.6, 128.5, 128.3, 118.6, 68.0, 67.8, 67.4, 38.4, 14.4; HRMS (ESI)  $m/z$  calcd for  $\text{C}_{28}\text{H}_{29}\text{N}_2\text{O}_4\text{S}^+$   $[\text{M} + \text{H}]^+ = 489.1843$ , found = 489.1846.



Benzyl-2-(3-(isobutoxycarbonyl)-3-(phenylthio)hex-5-en-2-ylidene)hydrazine-1-carboxylate **3g**:

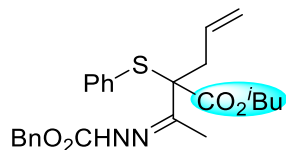

A yellow oil; 74.4 mg; isolated yield = 82%;  $^1\text{H}$  NMR (400 MHz,  $\text{CDCl}_3$ )  $\delta$  7.68 (s, 1H), 7.45 – 7.10 (m, 10H), 5.99 – 6.08 (m, 1H), 5.08 – 5.16 (m, 4H), 3.87 – 3.89 (m, 2H), 2.68 – 2.86 (m, 2H), 2.09 – 1.76 (m, 4H), 0.92 (d,  $J$  = 6.7 Hz, 6H);  $^{13}\text{C}$  NMR (100 MHz,  $\text{CDCl}_3$ )  $\delta$  170.1, 153.6, 147.9, 136.8, 135.9, 133.5, 130.0, 129.5, 128.7, 128.6, 128.3, 118.5, 72.5, 68.4, 67.4, 38.5, 27.6, 19.1, 14.6; HRMS (ESI)  $m/z$  calcd for  $\text{C}_{25}\text{H}_{31}\text{N}_2\text{O}_4\text{S}^+$  [ $\text{M} + \text{H}$ ] $^+$  = 455.1999, found = 455.2009.

Benzyl-2-(3-(*tert*-butoxycarbonyl)-3-(phenylthio)hex-5-en-2-ylidene)hydrazine-1-carboxylate **3h**:

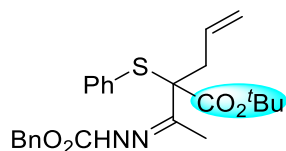

A yellow solid; 73.5 mg; isolated yield = 81%; m.p. 117.5-118.3°C;  $^1\text{H}$  NMR (400 MHz,  $\text{CDCl}_3$ )  $\delta$  7.85 (s, 1H), 7.52 – 7.05 (m, 10H), 6.20 – 5.96 (m, 1H), 5.10 – 5.18 (m, 4H), 2.64 – 2.85 (m, 2H), 1.93 (s, 3H), 1.44 (s, 9H);  $^{13}\text{C}$  NMR (100 MHz,  $\text{CDCl}_3$ )  $\delta$  168.8, 153.9, 148.2, 136.8, 136.0, 133.6, 132.2, 130.3, 129.3, 129.0, 128.9, 128.6, 128.5, 128.3, 127.8, 118.4, 83.3, 68.6, 67.1, 38.2, 27.9, 14.8; HRMS (ESI)  $m/z$  calcd for  $\text{C}_{25}\text{H}_{30}\text{N}_2\text{O}_4\text{SNa}^+$  [ $\text{M} + \text{Na}$ ] $^+$  = 477.1818, found = 477.1830.

Benzyl-2-(3-((allyloxy)carbonyl)-3-(phenylthio)hex-5-en-2-ylidene)hydrazine-1-carboxylate **3i**:

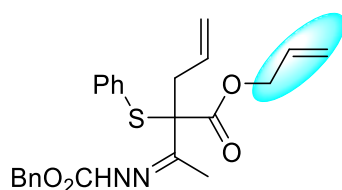

A yellow oil; 63.9 mg; isolated yield = 73%;  $^1\text{H}$  NMR (400 MHz,  $\text{CDCl}_3$ )  $\delta$  7.70 (s, 1H), 7.48 – 7.15 (m, 10H), 6.14 – 5.75 (m, 2H), 5.43 – 5.03 (m, 6H), 4.61 (d,  $J$  = 6.0 Hz, 2H), 2.79 (m, 2H), 1.90 (s, 3H);  $^{13}\text{C}$  NMR (100 MHz,  $\text{CDCl}_3$ )  $\delta$  169.7, 153.3, 147.6, 136.8, 135.9, 133.3, 131.3, 129.9, 129.6, 128.7, 128.6, 128.5, 128.3, 119.6, 118.6, 68.0, 67.4, 66.7, 38.5, 14.5; HRMS (ESI)  $m/z$  calcd for  $\text{C}_{24}\text{H}_{27}\text{N}_2\text{O}_4\text{S}^+$  [ $\text{M} + \text{H}$ ] $^+$  = 439.1686, found = 439.1684.

Benzyl-2-(3-((2-methoxyethoxy)carbonyl)-3-(phenylthio)hex-5-en-2-ylidene)hydrazine-1-carboxylate **3j**:

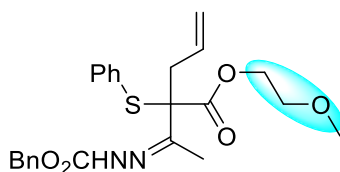

A yellow oil; 71.1 mg; isolated yield = 78%;  $^1\text{H}$  NMR (400 MHz,  $\text{CDCl}_3$ )  $\delta$  7.96 (s, 1H), 7.54 – 7.02 (m, 10H), 6.29 – 5.80 (m, 1H), 5.39 – 5.00 (m, 4H), 4.44 – 4.15 (m, 2H), 3.53 (t,  $J$  = 4.8 Hz, 2H), 3.32 (s, 3H), 2.67 – 2.90 (m, 2H), 1.90 (s, 3H);  $^{13}\text{C}$  NMR (100 MHz,  $\text{CDCl}_3$ )  $\delta$  170.1, 153.5, 147.8, 136.9, 136.0, 133.4, 130.0, 129.5, 128.7, 128.5, 128.3, 128.1, 118.5, 70.0, 68.0, 67.3, 64.7, 58.8, 38.4, 14.4; HRMS (ESI)  $m/z$  calcd for  $\text{C}_{24}\text{H}_{29}\text{N}_2\text{O}_5\text{S}^+$  [ $\text{M} + \text{H}$ ] $^+$  = 457.1792, found = 457.1793.

Benzyl-2-(4-(ethoxycarbonyl)-4-(phenylthio)hept-6-en-3-ylidene)hydrazine-1-carboxylate **3k**:

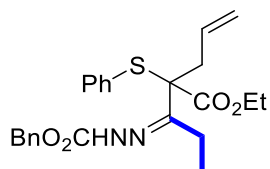

A yellow oil; 73.9 mg; isolated yield = 84%;  $^1\text{H}$  NMR (400 MHz,  $\text{CDCl}_3$ )  $\delta$  7.95 (s, 1H), 7.56 – 7.05 (m, 10H), 6.21 – 5.89 (m, 1H), 5.32 – 4.95 (m, 4H), 4.36 – 4.04 (m, 2H), 2.64 – 2.88 (m, 2H), 2.59 – 2.20 (m, 2H), 1.25 (t,  $J$  = 7.1 Hz, 3H), 1.11 (t,  $J$  = 7.7 Hz, 3H);  $^{13}\text{C}$  NMR (100 MHz,  $\text{CDCl}_3$ )  $\delta$  170.0, 153.3, 151.6, 136.8, 135.9, 133.4, 130.2, 129.4, 128.6, 128.6, 128.3, 118.6, 68.3, 67.4, 62.1, 37.9, 21.8, 14.2, 9.9; HRMS (ESI)  $m/z$  calcd for  $\text{C}_{24}\text{H}_{29}\text{N}_2\text{O}_4\text{S}^+$  [ $\text{M} + \text{H}$ ] $^+$  = 441.1843, found = 441.1839.

Benzyl-2-(5-(methoxycarbonyl)-5-(phenylthio)oct-7-en-4-ylidene)hydrazine-1-carboxylate **3l**:

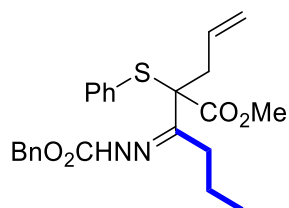

A yellow oil; 66.0 mg; isolated yield = 75%;  $^1\text{H}$  NMR (400 MHz,  $\text{CDCl}_3$ )  $\delta$  7.74 (s, 1H), 7.51 – 7.05 (m, 10H), 6.12 – 5.83 (m, 1H), 5.07 – 5.18 (m, 4H), 3.72 (s, 3H), 2.97 – 2.58 (m, 2H), 2.51 – 2.08 (m, 2H), 1.75 – 1.52 (m, 2H), 0.99 (t,  $J$  = 7.3 Hz, 3H);  $^{13}\text{C}$  NMR (100 MHz,  $\text{CDCl}_3$ )  $\delta$  170.5, 154.0, 150.7, 136.7, 135.9, 133.4, 130.1, 129.4, 128.7, 128.6, 128.3, 118.6, 68.3, 67.4, 52.7, 37.9, 30.9, 18.7, 14.8; HRMS (ESI)  $m/z$  calcd for  $\text{C}_{24}\text{H}_{29}\text{N}_2\text{O}_4\text{S}^+$  [ $\text{M} + \text{H}$ ] $^+$  = 441.1843, found = 441.1845.

Benzyl-2-(4-(methoxycarbonyl)-4-(phenylthio)non-1-en-5-ylidene)hydrazine-1-carboxylate **3m**:

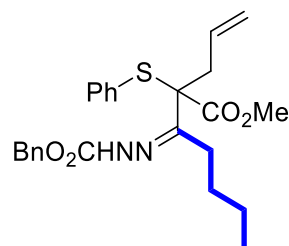

A yellow oil; 70.8 mg; isolated yield = 78%;  $^1\text{H}$  NMR (400 MHz,  $\text{CDCl}_3$ )  $\delta$  7.71 (s, 1H), 7.44 – 7.08 (m, 10H), 6.24 – 5.76 (m, 1H), 5.32 – 4.88 (m, 4H), 3.72 (s, 3H), 2.63 – 2.87 (m, 2H), 2.57 – 2.03 (m, 2H), 1.82 – 1.29 (m, 4H), 0.93 (t,  $J = 7.1$  Hz, 3H);  $^{13}\text{C}$  NMR (100 MHz,  $\text{CDCl}_3$ )  $\delta$  170.5, 154.2, 150.7, 136.7, 135.9, 133.4, 130.1, 129.4, 128.7, 128.5, 128.3, 118.6, 68.3, 67.4, 52.6, 38.0, 28.6, 27.1, 23.4, 13.7; HRMS (ESI)  $m/z$  calcd for  $\text{C}_{25}\text{H}_{31}\text{N}_2\text{O}_4\text{S}^+$   $[\text{M} + \text{H}]^+ = 455.1999$ , found = 455.2000.

Benzyl-2-(3-(methoxycarbonyl)-1-phenyl-3-(phenylthio)hex-5-en-2-ylidene)hydrazine-1-carboxylate **3n**:

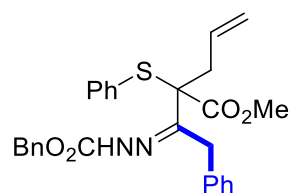

A red solid; 74.2 mg; isolated yield = 76%; m.p. 118.2-118.9°C;  $^1\text{H}$  NMR (400 MHz,  $\text{CDCl}_3$ )  $\delta$  7.79 (s, 1H), 7.50 – 7.06 (m, 15H), 6.00 – 6.08 (m, 1H), 5.31 – 4.94 (m, 4H), 3.70 – 4.04 (m, 2H), 3.40 (s, 3H), 2.72 – 2.98 (m, 2H);  $^{13}\text{C}$  NMR (100 MHz,  $\text{CDCl}_3$ )  $\delta$  170.2, 153.3, 147.9, 136.9, 135.9, 133.3, 133.0, 129.9, 129.6, 129.1, 128.8, 128.5, 128.2, 128.0, 127.3, 118.8, 68.7, 67.2, 52.4, 38.0, 34.7; HRMS (ESI)  $m/z$  calcd for  $\text{C}_{28}\text{H}_{29}\text{N}_2\text{O}_4\text{S}^+$   $[\text{M} + \text{H}]^+ = 489.1843$ , found = 489.1846.

Benzyl-2-(3-(ethoxycarbonyl)-3-((4-fluorophenyl)thio)hex-5-en-2-ylidene)hydrazine-1-carboxylate **3o**:

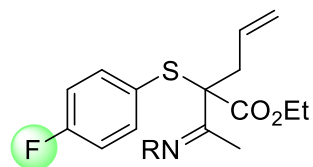

**3o**, R =  $\text{NHCO}_2\text{Bn}$

A yellow solid; 63.9 mg; isolated yield = 72%; m.p. 112.9-113.7°C;  $^1\text{H}$  NMR (400 MHz,  $\text{CDCl}_3$ )  $\delta$  7.84 (s, 1H), 7.30 – 7.37 (m, 7H), 6.91 – 6.95 (m, 2H), 6.29 – 5.83 (m, 1H), 5.31 – 4.93 (m, 4H), 4.16 – 4.22 (m, 2H), 2.62 – 2.85 (m, 2H), 1.90 (s, 3H), 1.24 (t,  $J = 7.1$  Hz, 3H);  $^{13}\text{C}$  NMR (100 MHz,  $\text{CDCl}_3$ )  $\delta$  169.9, 163.8 ( $J = 250$  Hz), 153.6, 147.5, 139.0 ( $J = 9$  Hz), 135.9, 133.2, 128.6, 128.4, 125.4, 125.3, 118.7, 115.9 ( $J = 20$

Hz), 68.0, 67.4, 62.2, 38.2, 14.4, 14.2;  $^{19}\text{F}$  NMR (376 MHz,  $\text{CDCl}_3$ )  $\delta$  -110.33; HRMS (ESI)  $m/z$  calcd for  $\text{C}_{23}\text{H}_{26}\text{FN}_2\text{O}_4\text{S}^+$   $[\text{M} + \text{H}]^+ = 445.1592$ , found = 445.1591.

Benzyl-2-(3-((4-bromophenyl)thio)-3-(ethoxycarbonyl)hex-5-en-2-ylidene)hydrazine-1-carboxylate **3p**:

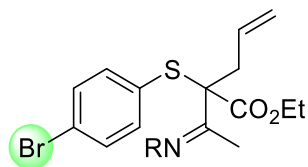

**3p**, R =  $\text{NHCO}_2\text{Bn}$

A white solid; 88.7 mg; isolated yield = 88%; m.p. 102.6-103.1°C;  $^1\text{H}$  NMR (400 MHz,  $\text{CDCl}_3$ )  $\delta$  7.89 (s, 1H), 7.41 – 7.30 (m, 7H), 7.24 – 7.16 (m, 2H), 5.93 – 5.99 (m, 1H), 5.30 – 4.99 (m, 4H), 4.15 – 4.19 (m, 2H), 2.63 – 2.87 (m, 2H), 1.89 (s, 3H), 1.24 (t,  $J = 7.1$  Hz, 3H);  $^{13}\text{C}$  NMR (100 MHz,  $\text{CDCl}_3$ )  $\delta$  169.8, 153.6, 147.5, 138.2, 135.8, 133.0, 131.9, 129.3, 128.7, 128.6, 128.4, 128.4, 124.3, 118.8, 68.0, 67.5, 62.3, 38.3, 14.4, 14.2; HRMS (ESI)  $m/z$  calcd for  $\text{C}_{23}\text{H}_{26}\text{BrN}_2\text{O}_4\text{S}^+$   $[\text{M} + \text{H}]^+ = 505.0791$ , found = 505.0793.

Benzyl-2-(3-(ethoxycarbonyl)-3-((4-(trifluoromethyl)phenyl)thio)hex-5-en-2-ylidene)hydrazine-1-carboxylate **3q**:

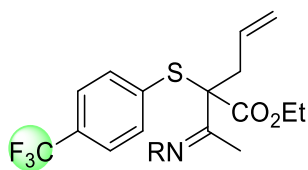

**3q**, R =  $\text{NHCO}_2\text{Bn}$

A yellow solid; 75.1 mg; isolated yield = 76%; m.p. 96.4-96.8°C;  $^1\text{H}$  NMR (400 MHz,  $\text{CDCl}_3$ )  $\delta$  7.92 (s, 1H), 7.48 (s, 4H), 7.35 (s, 5H), 5.94 – 6.01 (m, 1H), 5.43 – 4.93 (m, 4H), 4.17 – 4.23 (m, 2H), 2.68 – 2.93 (m, 2H), 1.89 (s, 3H), 1.24 (t,  $J = 7.1$  Hz, 3H);  $^{13}\text{C}$  NMR (100 MHz,  $\text{CDCl}_3$ )  $\delta$  169.7, 153.3, 147.4, 136.3, 135.6 ( $J = 30$  Hz), 132.8, 131.1 ( $J = 30$  Hz), 128.7, 128.6, 128.4, 128.2, 127.9, 125.4, 125.4 ( $J = 3$  Hz), 125.2, 123.9 ( $J = 271$  Hz), 68.2, 67.5, 62.4, 38.4, 14.3, 14.1;  $^{19}\text{F}$  NMR (376 MHz,  $\text{CDCl}_3$ )  $\delta$  -62.75; HRMS (ESI)  $m/z$  calcd for  $\text{C}_{24}\text{H}_{26}\text{F}_3\text{N}_2\text{O}_4\text{S}^+$   $[\text{M} + \text{H}]^+ = 495.1560$ , found = 495.1559.

Benzyl-2-(3-(ethoxycarbonyl)-3-((4-nitrophenyl)thio)hex-5-en-2-ylidene)hydrazine-1-carboxylate **3r**:

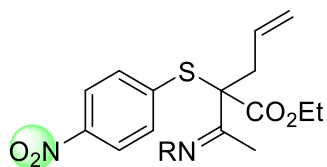

**3r**, R =  $\text{NHCO}_2\text{Bn}$

A yellow oil; 60.3 mg; isolated yield = 64%;  $^1\text{H}$  NMR (400 MHz,  $\text{CDCl}_3$ )  $\delta$  8.05 (d,  $J$  = 8.4 Hz, 2H), 7.93 (s, 1H), 7.52 (d,  $J$  = 8.8 Hz, 2H), 7.36 (s, 5H), 5.90 – 5.97 (m, 1H), 5.36 – 4.98 (m, 4H), 4.19 – 4.25 (m, 2H), 2.73 – 2.98 (m, 2H), 1.89 (s, 3H), 1.25 (t,  $J$  = 7.1 Hz, 3H);  $^{13}\text{C}$  NMR (100 MHz,  $\text{CDCl}_3$ )  $\delta$  169.4, 153.4, 147.8, 140.1, 135.6, 132.3, 128.6, 128.6, 128.3, 123.5, 119.3, 68.5, 67.7, 62.6, 38.5, 14.2, 14.1; HRMS (ESI)  $m/z$  calcd for  $\text{C}_{23}\text{H}_{26}\text{N}_3\text{O}_6\text{S}^+$  [ $\text{M} + \text{H}$ ] $^+$  = 472.1537, found = 472.1536.

Benzyl-2-(3-(ethoxycarbonyl)-3-((4-ethylphenyl)thio)hex-5-en-2-ylidene)hydrazine-1-carboxylate **3s**:

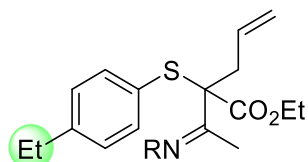

**3s**, R =  $\text{NHCO}_2\text{Bn}$

A yellow solid; 59.9 mg; isolated yield = 66%; m.p. 98.8-99.5°C;  $^1\text{H}$  NMR (400 MHz,  $\text{CDCl}_3$ )  $\delta$  7.82 (s, 1H), 7.52 – 6.91 (m, 9H), 6.26 – 5.87 (m, 1H), 5.33 – 4.98 (m, 4H), 4.37 – 3.86 (m, 2H), 2.80 – 2.92 (m, 2H), 2.55 – 2.72 (m, 2H), 2.05 – 1.57 (m, 3H), 1.43 – 0.97 (m, 6H);  $^{13}\text{C}$  NMR (100 MHz,  $\text{CDCl}_3$ )  $\delta$  170.1, 149.3, 146.0, 137.4, 136.9, 135.9, 133.7, 133.6, 129.5, 129.2, 129.0, 128.5, 128.3, 126.6, 125.9, 118.4, 67.9, 67.3, 62.1, 38.4, 28.6, 15.3, 14.5, 14.2; HRMS (ESI)  $m/z$  calcd for  $\text{C}_{25}\text{H}_{31}\text{N}_2\text{O}_4\text{S}^+$  [ $\text{M} + \text{H}$ ] $^+$  = 455.1999, found = 455.1999.

Benzyl-2-(3-((4-(tert-butyl)phenyl)thio)-3-(ethoxycarbonyl)hex-5-en-2-ylidene)hydrazine-1-carboxylate **3t**:

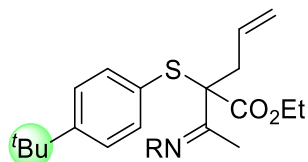

**3t**, R =  $\text{NHCO}_2\text{Bn}$

A yellow oil; 72.3 mg; isolated yield = 75%;  $^1\text{H}$  NMR (400 MHz,  $\text{CDCl}_3$ )  $\delta$  7.71 (s, 1H), 7.44 – 7.12 (m, 9H), 6.00 – 6.06 (m, 1H), 5.36 – 4.89 (m, 4H), 4.16 – 4.21 (m, 2H), 2.98 – 2.59 (m, 2H), 1.90 (s, 3H), 1.44 – 1.04 (m, 12H);  $^{13}\text{C}$  NMR (100 MHz,  $\text{CDCl}_3$ )  $\delta$  170.1, 152.8, 147.8, 136.5, 135.9, 133.6, 128.6, 128.3, 126.5, 125.8, 118.4, 67.9, 67.3, 62.1, 38.5, 34.7, 31.2, 14.5, 14.2; HRMS (ESI)  $m/z$  calcd for  $\text{C}_{27}\text{H}_{35}\text{N}_2\text{O}_4\text{S}^+$  [ $\text{M} + \text{H}$ ] $^+$  = 483.2312, found = 483.2316.

Benzyl-2-(3-((2-chlorophenyl)thio)-3-(ethoxycarbonyl)hex-5-en-2-ylidene)hydrazine-1-carboxylate **3u**:

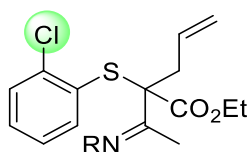

**3u**, R = NHCO<sub>2</sub>Bn

A yellow oil; 74.5 mg; isolated yield = 81%; <sup>1</sup>H NMR (400 MHz, CDCl<sub>3</sub>) δ 7.80 (s, 1H), 7.34 – 7.48 (m, 7H), 7.10 – 7.22 (m, 2H), 6.29 – 5.96 (m, 1H), 5.09 – 5.22 (m, 4H), 4.17 – 4.23 (m, 2H), 2.73 – 2.91 (m, 2H), 1.91 (s, 3H), 1.24 (t, *J* = 7.1 Hz, 3H); <sup>13</sup>C NMR (100 MHz, CDCl<sub>3</sub>) δ 165.0, 149.2, 143.0, 135.9, 134.4, 131.2, 128.7, 126.0, 125.4, 124.8, 123.8, 123.6, 122.0, 113.8, 63.6, 62.6, 57.5, 33.8, 9.7, 9.4; HRMS (ESI) *m/z* calcd for C<sub>23</sub>H<sub>26</sub>ClN<sub>2</sub>O<sub>4</sub>S<sup>+</sup> [M + H]<sup>+</sup> = 461.1296, found = 461.1303.

Benzyl-2-(3-(ethoxycarbonyl)-3-((2-methoxyphenyl)thio)hex-5-en-2-ylidene)hydrazine-1-carboxylate 3v:

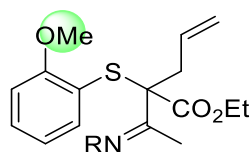

**3v**, R = NHCO<sub>2</sub>Bn

A yellow solid; 77.5 mg; isolated yield = 85%; m.p. 103.7-104.2°C; <sup>1</sup>H NMR (400 MHz, CDCl<sub>3</sub>) δ 7.86 (s, 1H), 7.54 – 7.23 (m, 7H), 6.74 – 6.85 (m, 2H), 6.35 – 5.92 (m, 1H), 5.35 – 4.98 (m, 4H), 4.14 – 4.20 (m, 2H), 3.71 (s, 3H), 2.66 – 2.83 (m, 2H), 1.92 (s, 3H), 1.24 (t, *J* = 7.1 Hz, 3H); <sup>13</sup>C NMR (100 MHz, CDCl<sub>3</sub>) δ 165.4, 156.8, 149.4, 143.9, 135.2, 131.3, 129.4, 127.0, 123.8, 123.5, 115.8, 113.2, 112.9, 106.4, 63.3, 62.4, 57.3, 50.8, 33.5, 9.6, 9.4; HRMS (ESI) *m/z* calcd for C<sub>24</sub>H<sub>29</sub>N<sub>2</sub>O<sub>5</sub>S<sup>+</sup> [M + H]<sup>+</sup> = 457.1792, found = 457.1799.

Benzyl-2-(3-((3,4-dichlorophenyl)thio)-3-(ethoxycarbonyl)hex-5-en-2-ylidene)hydrazine-1-carboxylate 3w:

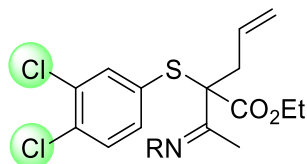

**3w**, R = NHCO<sub>2</sub>Bn

A white solid; 72.1 mg; isolated yield = 73%; m.p. 93.1-93.9°C; <sup>1</sup>H NMR (400 MHz, CDCl<sub>3</sub>) δ 7.68 – 6.85 (m, 9H), 5.91 – 5.97 (m, 1H), 5.34 – 4.99 (m, 4H), 4.16 – 4.21 (m, 2H), 2.61 – 2.85 (m, 2H), 1.90 (s, 3H), 1.24 (t, *J* = 7.1 Hz, 3H); <sup>13</sup>C NMR (100 MHz, CDCl<sub>3</sub>) δ 169.7, 153.9, 147.3, 138.1, 135.9, 135.8, 134.1, 132.8, 132.4, 130.5, 130.4, 128.6, 128.3, 119.0, 68.3, 67.5, 62.4, 38.2, 14.5, 14.2; HRMS (ESI) *m/z* calcd for C<sub>23</sub>H<sub>25</sub>Cl<sub>2</sub>N<sub>2</sub>O<sub>4</sub>S<sup>+</sup> [M + H]<sup>+</sup> = 495.0907, found = 495.0911.

Benzyl-2-(3-((3,5-dimethylphenyl)thio)-3-(ethoxycarbonyl)hex-5-en-2-ylidene)hydrazine-1-carboxylate 3x:

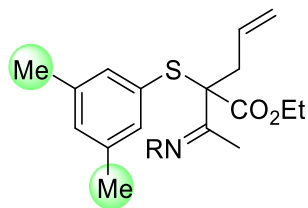

**3x**, R = NHCO<sub>2</sub>Bn

A yellow solid; 73.5 mg; isolated yield = 81%; m.p. 97.5-98.1°C; <sup>1</sup>H NMR (400 MHz, CDCl<sub>3</sub>) δ 7.32 (s, 6H), 6.90 – 6.93 (m, 3H), 6.29 – 5.82 (m, 1H), 5.06 – 5.17 (m, 4H), 4.15 – 4.21 (m, 2H), 2.63 – 2.83 (m, 2H), 2.19 (s, 6H), 1.91 (s, 3H), 1.23 (t, *J* = 7.1 Hz, 3H); <sup>13</sup>C NMR (100 MHz, CDCl<sub>3</sub>) δ 170.1, 153.7, 148.0, 138.1, 136.0, 134.4, 133.7, 131.2, 129.3, 128.6, 128.6, 128.5, 128.4, 128.3, 118.3, 67.9, 67.3, 62.1, 38.4, 21.0, 14.6, 14.2; HRMS (ESI) *m/z* calcd for C<sub>25</sub>H<sub>31</sub>N<sub>2</sub>O<sub>4</sub>S<sup>+</sup> [M + H]<sup>+</sup> = 455.1999, found = 455.1999.

Benzyl-2-(3-(allylthio)-3-(ethoxycarbonyl)hex-5-en-2-ylidene)hydrazine-1-carboxylate **3y**:

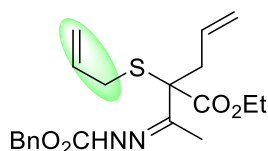

A yellow oil; 66.3 mg; isolated yield = 85%; <sup>1</sup>H NMR (400 MHz, CDCl<sub>3</sub>) δ 8.03 (s, 1H), 7.34 – 7.40 (m, 5H), 6.01 – 5.63 (m, 2H), 5.44 – 5.09 (m, 6H), 4.18 (q, *J* = 7.1 Hz, 2H), 3.32 – 2.77 (m, 4H), 1.87 (s, 3H), 1.23 (t, *J* = 7.1 Hz, 3H); <sup>13</sup>C NMR (100 MHz, CDCl<sub>3</sub>) δ 170.2, 153.8, 148.7, 135.9, 133.7, 133.2, 128.6, 128.4, 118.5, 117.8, 67.5, 65.1, 62.0, 38.4, 31.9, 14.2, 13.8; HRMS (ESI) *m/z* calcd for C<sub>20</sub>H<sub>27</sub>N<sub>2</sub>O<sub>4</sub>S<sup>+</sup> [M + H]<sup>+</sup> = 391.1686, found = 391.1682.

Benzyl-2-(3-((4-bromophenyl)thio)-3-(ethoxycarbonyl)hexa-4,5-dien-2-ylidene)hydrazine-1-carboxylate **3z**:

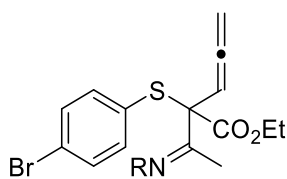

**3z**, R = NHCO<sub>2</sub>Bn

A red oil; 68.3 mg; isolated yield = 68%; <sup>1</sup>H NMR (400 MHz, CDCl<sub>3</sub>) δ 7.74 (s, 1H), 7.34 – 7.41 (m, 9H), 5.78 (t, *J* = 6.7 Hz, 1H), 5.19 – 5.25 (m, 2H), 4.87 (d, *J* = 6.7 Hz, 2H), 4.13 – 4.18 (m, 2H), 1.84 (s, 3H), 1.20 (t, *J* = 7.1 Hz, 3H); <sup>13</sup>C NMR (100 MHz, CDCl<sub>3</sub>) δ 207.9, 168.6, 153.9, 148.8, 138.3, 135.8, 131.7, 130.1, 128.6, 128.5, 124.1, 90.8, 79.0, 67.7, 66.6, 62.4, 14.6, 14.0; HRMS (ESI) *m/z* calcd for C<sub>23</sub>H<sub>24</sub>BrN<sub>2</sub>O<sub>4</sub>S<sup>+</sup> [M + H]<sup>+</sup> = 503.0635, found = 503.0631.

Benzyl-2-(3-(ethoxycarbonyl)-3-((4-(trifluoromethyl)phenyl)thio)hexa-4,5-dien-2-ylidene)hydrazine-1-carboxylate **3a'**:

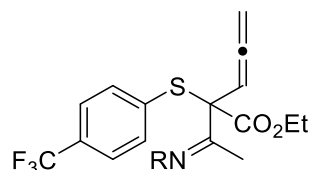

**3a'**, R = NHCO<sub>2</sub>Bn

A red solid; 73.8 mg; isolated yield = 75%; m.p. 95.1-95.6°C; <sup>1</sup>H NMR (400 MHz, CDCl<sub>3</sub>) δ 7.79 (s, 1H), 7.34 – 7.67 (m, 9H), 5.83 (t, *J* = 6.6 Hz, 1H), 5.20 – 5.29 (m, 2H), 4.88 (d, *J* = 6.7 Hz, 2H), 4.37 – 4.06 (m, 2H), 1.84 (s, 3H), 1.18 (t, *J* = 7.1 Hz, 3H); <sup>13</sup>C NMR (100 MHz, CDCl<sub>3</sub>) δ 208.1, 168.5, 153.6, 146.9, 136.2, 135.7, 130.8 (*J* = 32 Hz), 129.0, 128.7, 128.6, 128.5, 125.3, 123.9 (*J* = 271 Hz), 122.6, 90.8, 79.2, 67.7, 66.7, 62.6, 14.5, 14.0; <sup>19</sup>F NMR (376 MHz, CDCl<sub>3</sub>) δ -62.74; HRMS (ESI) *m/z* calcd for C<sub>24</sub>H<sub>24</sub>F<sub>3</sub>N<sub>2</sub>O<sub>4</sub>S<sup>+</sup> [*M* + *H*]<sup>+</sup> = 493.1403, found = 493.1406.

Benzyl-2-(3-(ethoxycarbonyl)-3-((4-nitrophenyl)thio)hexa-4,5-dien-2-ylidene)hydrazine-1-carboxylate **3b'**:

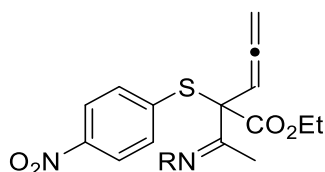

**3b'**, R = NHCO<sub>2</sub>Bn

A yellow oil; 62.8 mg; isolated yield = 67%; <sup>1</sup>H NMR (400 MHz, CDCl<sub>3</sub>) δ 8.02 – 8.04 (m, 2H), 7.79 (s, 1H), 7.63 – 7.70 (m, 2H), 7.36 – 7.39 (m, 5H), 5.88 – 5.91 (t, *J* = 6.5 Hz, 1H), 5.20 – 5.29 (m, 2H), 4.91 (d, *J* = 6.7 Hz, 2H), 4.45 – 3.89 (m, 2H), 1.84 (s, 3H), 1.21 (t, *J* = 7.1 Hz, 3H); <sup>13</sup>C NMR (100 MHz, CDCl<sub>3</sub>) δ 208.4, 168.3, 153.9, 148.8, 147.5, 141.0, 135.6, 134.9, 128.7, 128.6, 128.5, 123.3, 90.6, 79.6, 67.8, 66.9, 62.8, 14.3, 14.1; HRMS (ESI) *m/z* calcd for C<sub>23</sub>H<sub>24</sub>N<sub>3</sub>O<sub>6</sub>S<sup>+</sup> [*M* + *H*]<sup>+</sup> = 470.1380, found = 470.1377.

Benzyl-2-(3-(ethoxycarbonyl)-3-((2-methoxyphenyl)thio)hexa-4,5-dien-2-ylidene)hydrazine-1-carboxylate **3c'**:

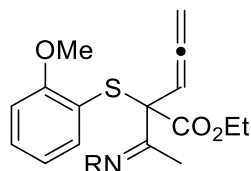

**3c'**, R = NHCO<sub>2</sub>Bn

A yellow oil; 58.1 mg; isolated yield = 64%; <sup>1</sup>H NMR (400 MHz, CDCl<sub>3</sub>) δ 7.71 (s, 1H), 7.65 – 7.27 (m, 7H), 6.77 – 6.87 (m, 2H), 5.82 (t, *J* = 6.6 Hz, 1H), 5.18 (t, *J* = 17.1 Hz, 2H), 4.82 – 4.84 (m, 2H), 4.17 – 4.22 (m, 2H), 3.75 (s, 3H), 1.89 (s, 3H), 1.23 (t, *J* = 7.1 Hz, 3H); <sup>13</sup>C NMR (100 MHz, CDCl<sub>3</sub>) δ 207.0, 168.9, 161.1, 154.9,



147.2, 139.8, 135.9, 131.5, 128.7, 128.7, 128.5, 128.3, 120.6, 118.3, 110.9, 91.0, 78.5, 67.4, 66.3, 62.2, 55.7, 14.5, 14.1; HRMS (ESI)  $m/z$  calcd for  $C_{24}H_{27}N_2O_5S^+$   $[M + H]^+$  = 455.1635, found = 455.1632.

**Ethyl 2-acetyl-2-(phenylthio)pent-4-enoate 4:**

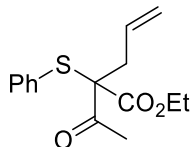

A yellow oil; 37.8 mg; isolated yield = 68%;  $^1H$  NMR (400 MHz,  $CDCl_3$ )  $\delta$  7.31 – 7.42 (m, 5H), 6.13 – 5.78 (m, 1H), 5.26 – 4.96 (m, 2H), 4.22 – 4.27 (m, 2H), 2.48 – 2.68 (m, 2H), 2.36 (s, 3H), 1.28 (t,  $J = 7.1$  Hz, 3H);  $^{13}C$  NMR (100 MHz,  $CDCl_3$ )  $\delta$  198.3, 168.6, 136.8, 132.2, 123.0, 129.1, 129.0, 119.1, 70.3, 62.4, 36.6, 26.4, 14.1; HRMS (ESI)  $m/z$  calcd for  $C_{15}H_{18}O_3SNa^+$   $[M + Na]^+$  = 301.0869, found = 301.0864.

**Ethyl 2-(1-hydroxyethyl)-2-(phenylthio)pent-4-enoate 5:**

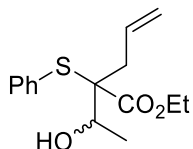

A yellow oil; 54.3 mg; dr = 4:1; isolated yield = 97%;  $^1H$  NMR (400 MHz,  $CDCl_3$ )  $\delta$  7.73 – 7.14 (m, 5H), 6.21 – 5.55 (m, 1H), 5.09 – 5.13 (m, 2H), 4.29 – 3.87 (m, 3H), 3.13 – 3.15 (m, 1H), 2.80 – 2.33 (m, 2H), 1.33 – 1.39 (m, 3H), 1.30 – 1.02 (m, 3H);  $^{13}C$  NMR (100 MHz,  $CDCl_3$ )  $\delta$  172.3, 137.0, 133.7, 130.1, 129.6, 128.8, 118.0, 70.1, 62.9, 61.5, 36.6, 17.7, 14.0; HRMS (ESI)  $m/z$  calcd for  $C_{15}H_{20}O_3SNa^+$   $[M + Na]^+$  = 303.1025, found = 303.1030.

**Ethyl 2-acetyl-2-(allylthio)pent-4-enoate 6:**

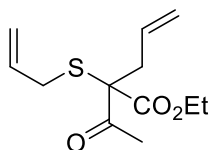

A yellow oil; 29.0 mg; isolated yield = 60%;  $^1H$  NMR (400 MHz,  $CDCl_3$ )  $\delta$  5.95 – 5.65 (m, 2H), 5.09 – 5.22 (m, 4H), 4.25 (q,  $J = 7.1$  Hz, 2H), 2.76 – 3.07 (m, 4H), 2.30 (s, 3H), 1.29 (t,  $J = 7.1$  Hz, 3H);  $^{13}C$  NMR (100 MHz,  $CDCl_3$ )  $\delta$  198.7, 168.8, 132.5, 131.9, 119.1, 118.6, 67.2, 62.3, 36.6, 32.1, 25.8, 14.0; HRMS (ESI)  $m/z$  calcd for  $C_{12}H_{18}O_3SNa^+$   $[M + Na]^+$  = 265.0869, found = 265.0863.

**Ethyl 2-acetyl-3,6-dihydro-2H-thiopyran-2-carboxylate 7:**

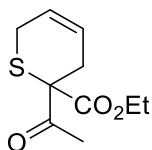

A brown oil; 39.4 mg; isolated yield = 92%;  $^1\text{H}$  NMR (400 MHz,  $\text{CDCl}_3$ )  $\delta$  6.16 – 5.58 (m, 2H), 4.24 – 4.30 (m, 2H), 2.51 – 3.07 (m, 4H), 2.34 (s, 3H), 1.30 (t,  $J = 7.1$  Hz, 3H);  $^{13}\text{C}$  NMR (100 MHz,  $\text{CDCl}_3$ )  $\delta$  198.6, 169.3, 126.4, 121.9, 62.6, 61.2, 29.8, 24.9, 24.8, 14.0; HRMS (ESI)  $m/z$  calcd for  $\text{C}_{10}\text{H}_{14}\text{O}_3\text{SNa}^+$   $[\text{M} + \text{Na}]^+ = 237.0556$ , found = 237.0556.

**Benzyl 2-(3-(ethoxycarbonyl)-3-(phenylsulfonyl)hex-5-en-2-ylidene)hydrazine-1-carboxylate 8:**

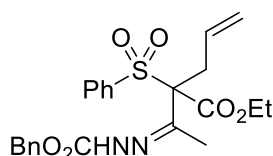

A yellow oil; 74.2 mg; isolated yield = 81%;  $^1\text{H}$  NMR (400 MHz,  $\text{CDCl}_3$ )  $\delta$  7.99 (s, 1H), 7.95 – 7.15 (m, 10H), 5.78 – 5.86 (m, 1H), 5.31 – 4.87 (m, 4H), 4.10 – 4.27 (m, 2H), 3.78 – 2.31 (m, 2H), 2.25 – 1.70 (m, 3H), 1.40 – 1.06 (m, 3H);  $^{13}\text{C}$  NMR (100 MHz,  $\text{CDCl}_3$ )  $\delta$  166.0, 152.9, 136.8, 134.7, 131.9, 130.5, 128.6, 128.6, 128.5, 119.6, 83.4, 67.6, 62.5, 36.8, 15.9, 14.0; HRMS (ESI)  $m/z$  calcd for  $\text{C}_{23}\text{H}_{26}\text{N}_2\text{O}_6\text{SNa}^+$   $[\text{M} + \text{Na}]^+ = 481.1404$ , found = 481.1414.

**Benzyl 4-allyl-3-methyl-5-oxo-4-(phenylthio)-4,5-dihydro-1H-pyrazole-1-carboxylate 9:**

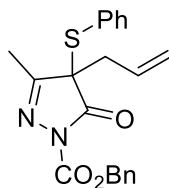

A red oil; 49.4 mg; isolated yield = 65%;  $^1\text{H}$  NMR (400 MHz,  $\text{CDCl}_3$ )  $\delta$  7.50 – 6.95 (m, 10H), 5.58 – 5.40 (m, 1H), 5.30 – 4.94 (m, 4H), 2.52 – 2.87 (m, 2H), 2.24 (s, 3H);  $^{13}\text{C}$  NMR (100 MHz,  $\text{CDCl}_3$ )  $\delta$  171.6, 160.3, 148.3, 136.0, 134.9, 130.7, 129.4, 129.3, 128.5, 128.5, 128.5, 127.0, 121.2, 68.5, 62.2, 36.2, 14.0; HRMS (ESI)  $m/z$  calcd for  $\text{C}_{21}\text{H}_{20}\text{N}_2\text{O}_3\text{SNa}^+$   $[\text{M} + \text{Na}]^+ = 403.1087$ , found = 403.1088.

## 4. X-ray single crystal data for compound 3a

Compound 3a:

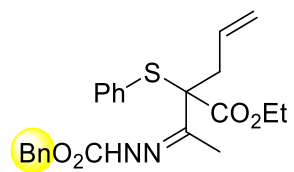

CCDC:2234932

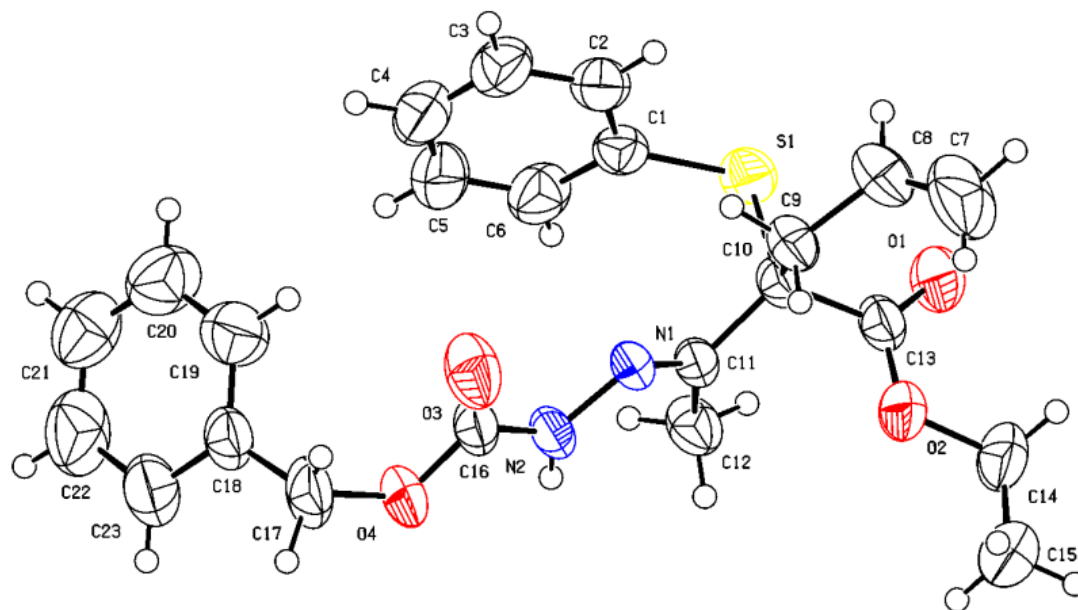

**Table 1 Crystal data and structure refinement for 202209176.**

|                                             |                                                                 |
|---------------------------------------------|-----------------------------------------------------------------|
| Identification code                         | 202209176                                                       |
| Empirical formula                           | C <sub>23</sub> H <sub>26</sub> N <sub>2</sub> O <sub>4</sub> S |
| Formula weight                              | 426.52                                                          |
| Temperature/K                               | 293(2)                                                          |
| Crystal system                              | monoclinic                                                      |
| Space group                                 | P2 <sub>1</sub> /c                                              |
| a/Å                                         | 11.8940(8)                                                      |
| b/Å                                         | 13.8863(6)                                                      |
| c/Å                                         | 14.5801(9)                                                      |
| α/°                                         | 90                                                              |
| β/°                                         | 108.178(7)                                                      |
| γ/°                                         | 90                                                              |
| Volume/Å <sup>3</sup>                       | 2287.9(2)                                                       |
| Z                                           | 4                                                               |
| ρ <sub>calc</sub> /cm <sup>3</sup>          | 1.238                                                           |
| μ/mm <sup>-1</sup>                          | 1.506                                                           |
| F(000)                                      | 904.0                                                           |
| Crystal size/mm <sup>3</sup>                | 0.17 × 0.13 × 0.1                                               |
| Radiation                                   | CuKα (λ = 1.54184)                                              |
| 2θ range for data collection/°              | 7.824 to 134.158                                                |
| Index ranges                                | -14 ≤ h ≤ 10, -10 ≤ k ≤ 16, -17 ≤ l ≤ 17                        |
| Reflections collected                       | 8969                                                            |
| Independent reflections                     | 4075 [R <sub>int</sub> = 0.0276, R <sub>sigma</sub> = 0.0357]   |
| Data/restraints/parameters                  | 4075/0/273                                                      |
| Goodness-of-fit on F <sup>2</sup>           | 1.034                                                           |
| Final R indexes [I ≥ 2σ (I)]                | R <sub>1</sub> = 0.0504, wR <sub>2</sub> = 0.1357               |
| Final R indexes [all data]                  | R <sub>1</sub> = 0.0627, wR <sub>2</sub> = 0.1500               |
| Largest diff. peak/hole / e Å <sup>-3</sup> | 0.42/-0.24                                                      |

## 5. NMR Spectra

3a

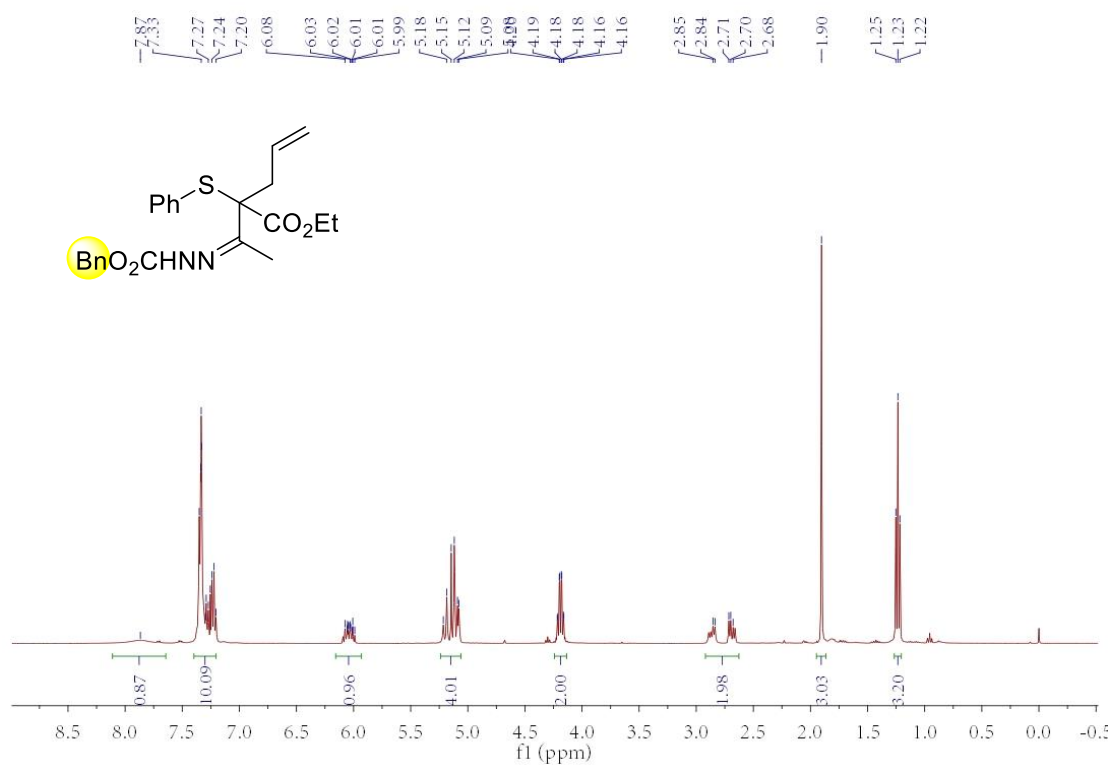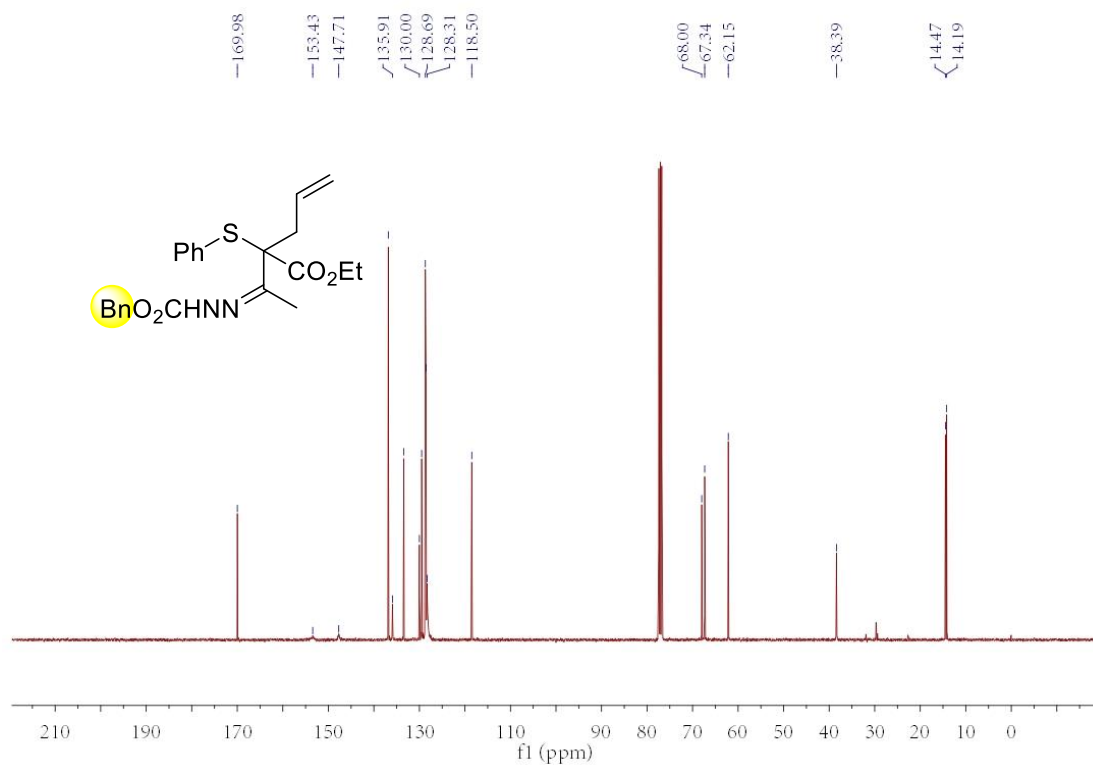

3b

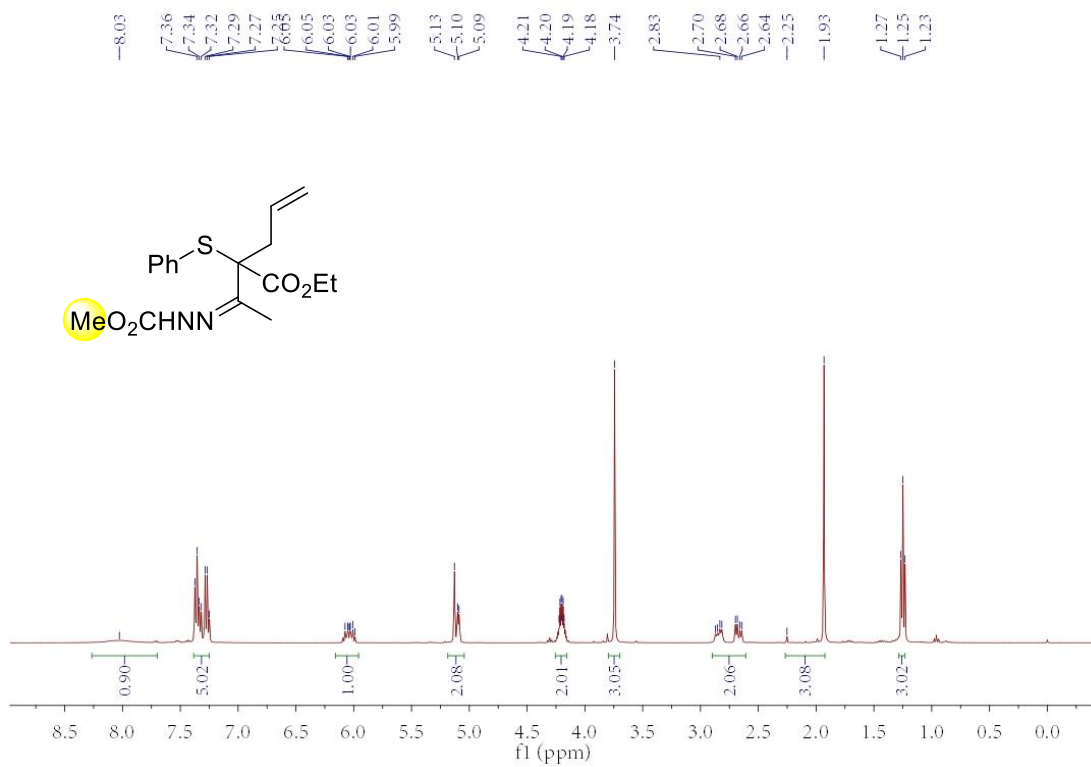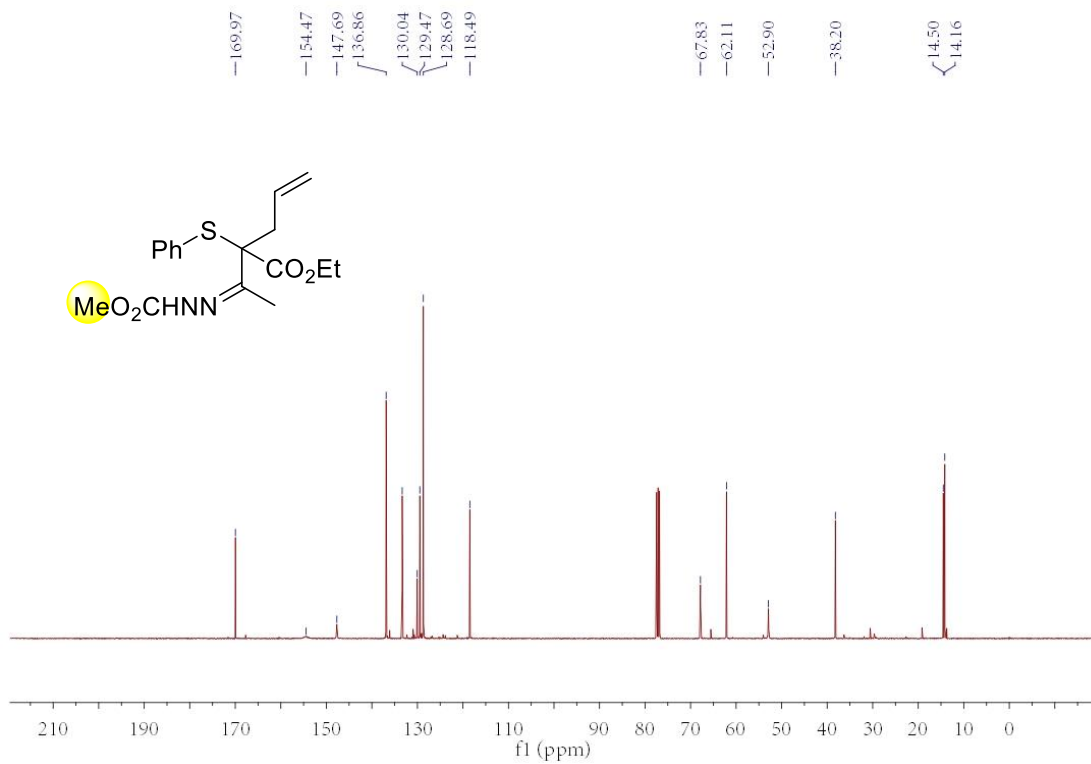

3c

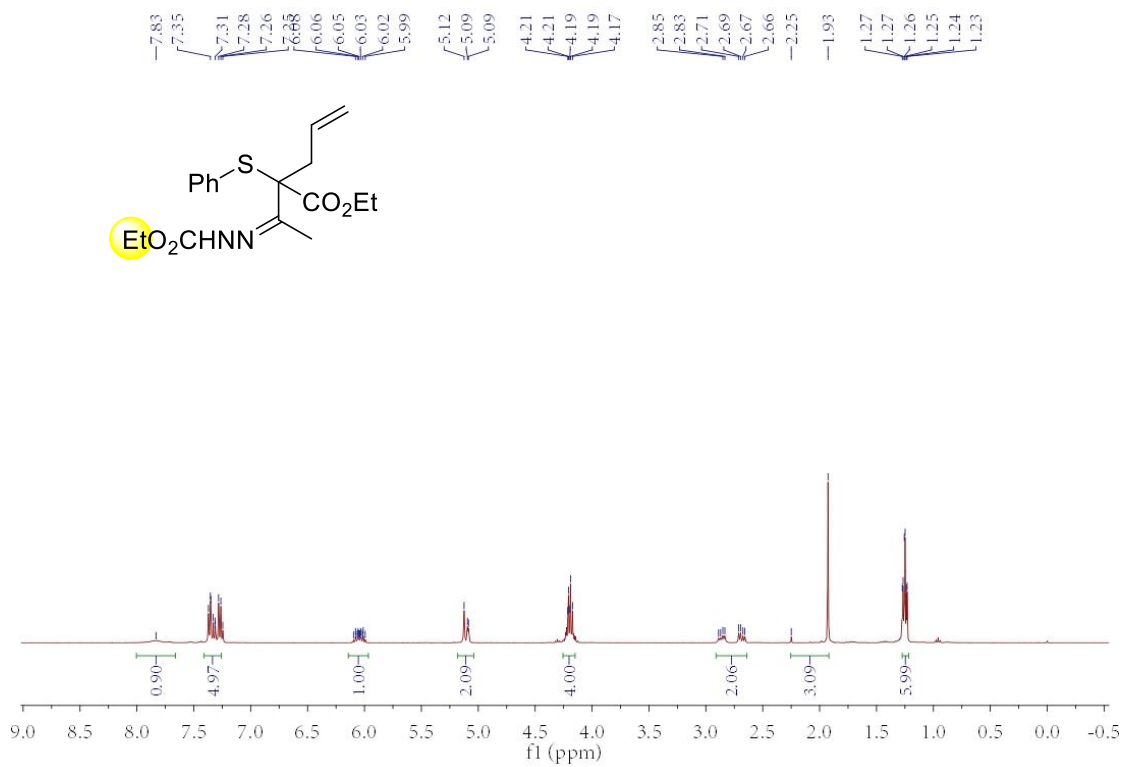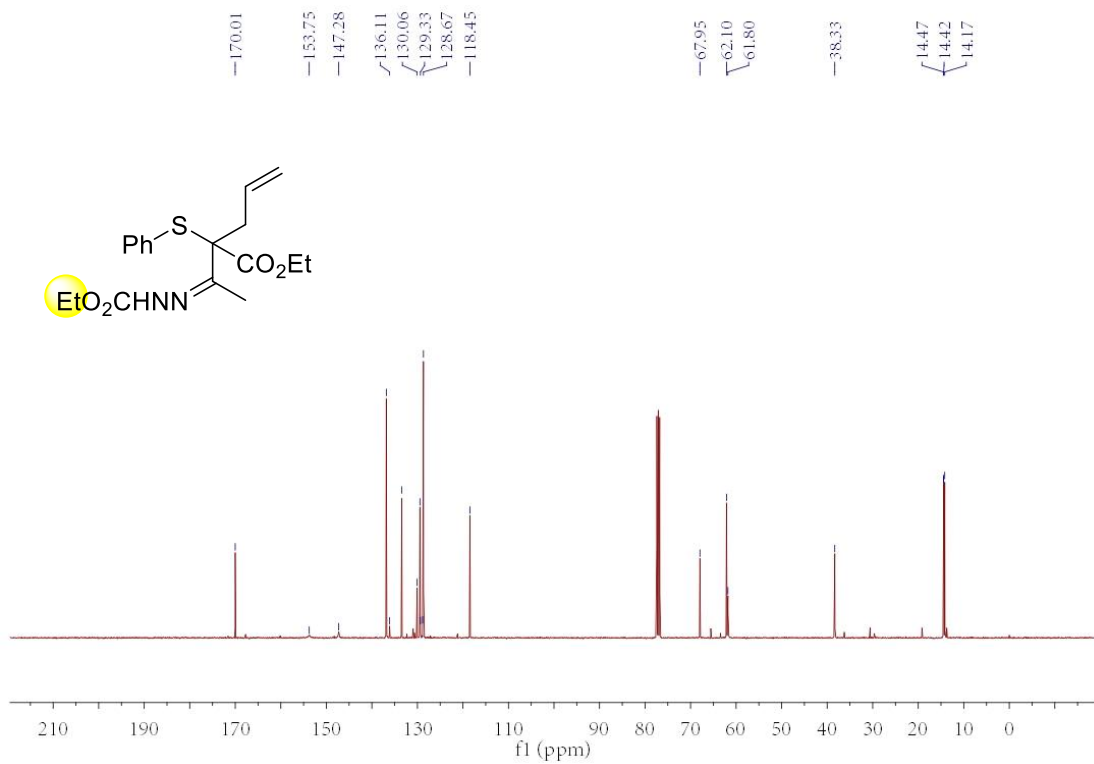

**3d**, R = fluorenylmethyl

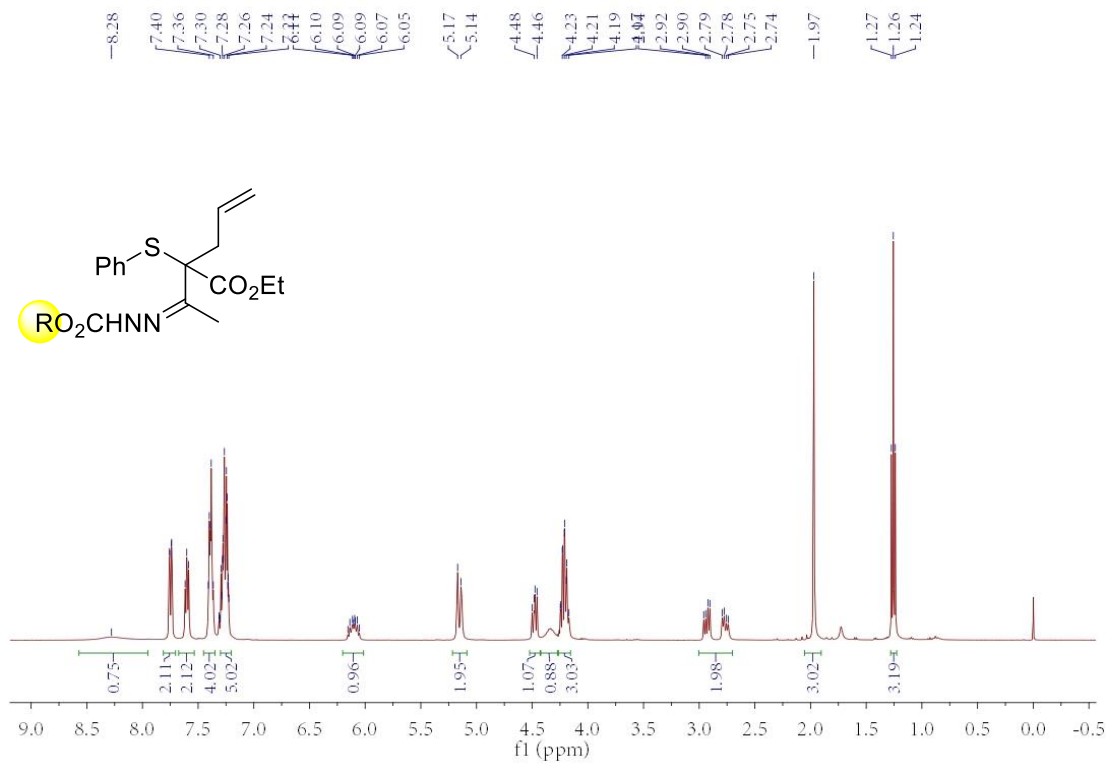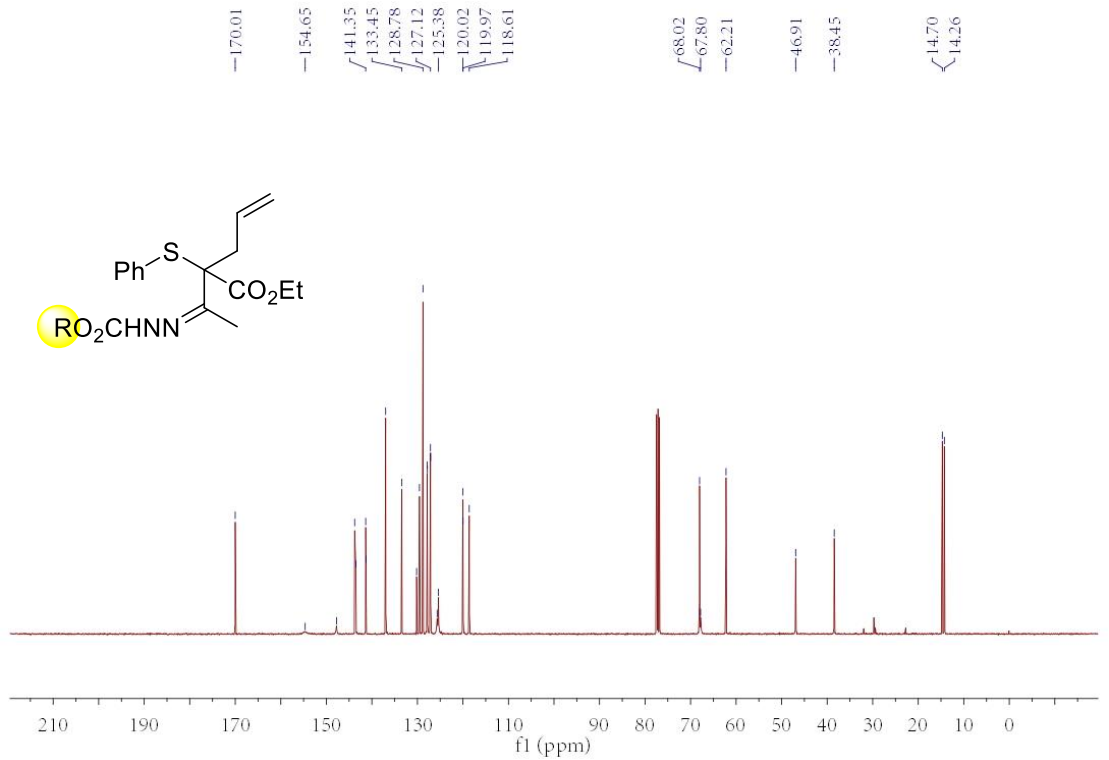



3e

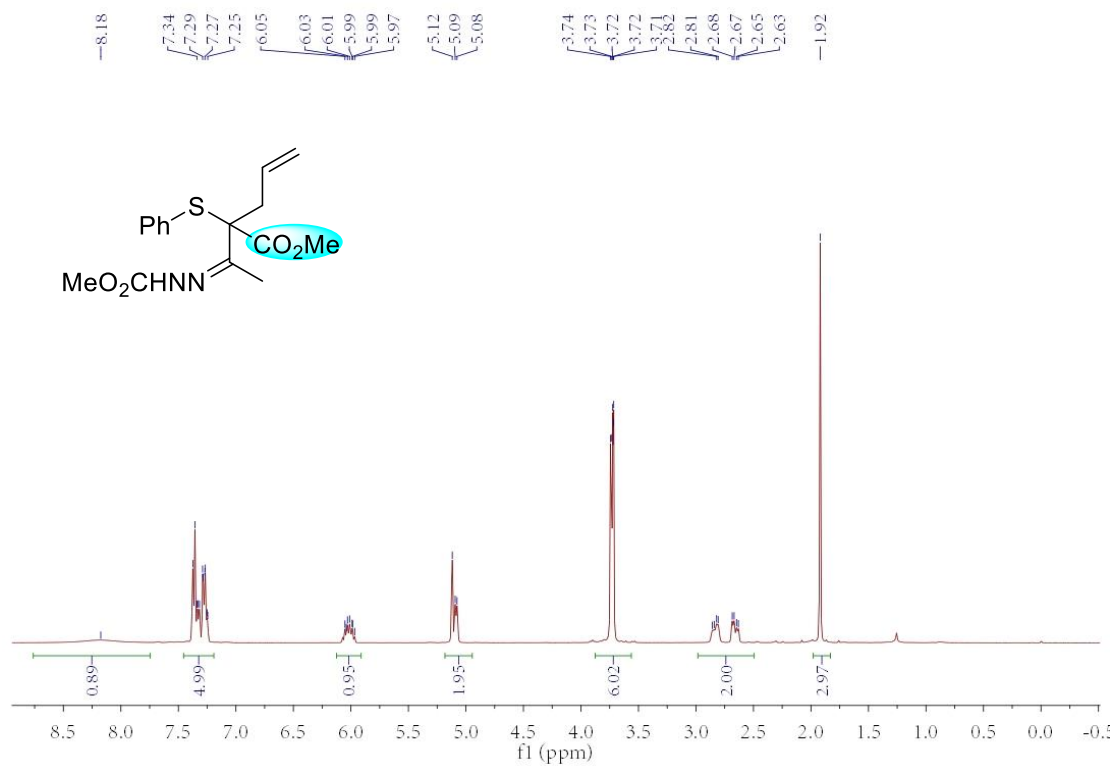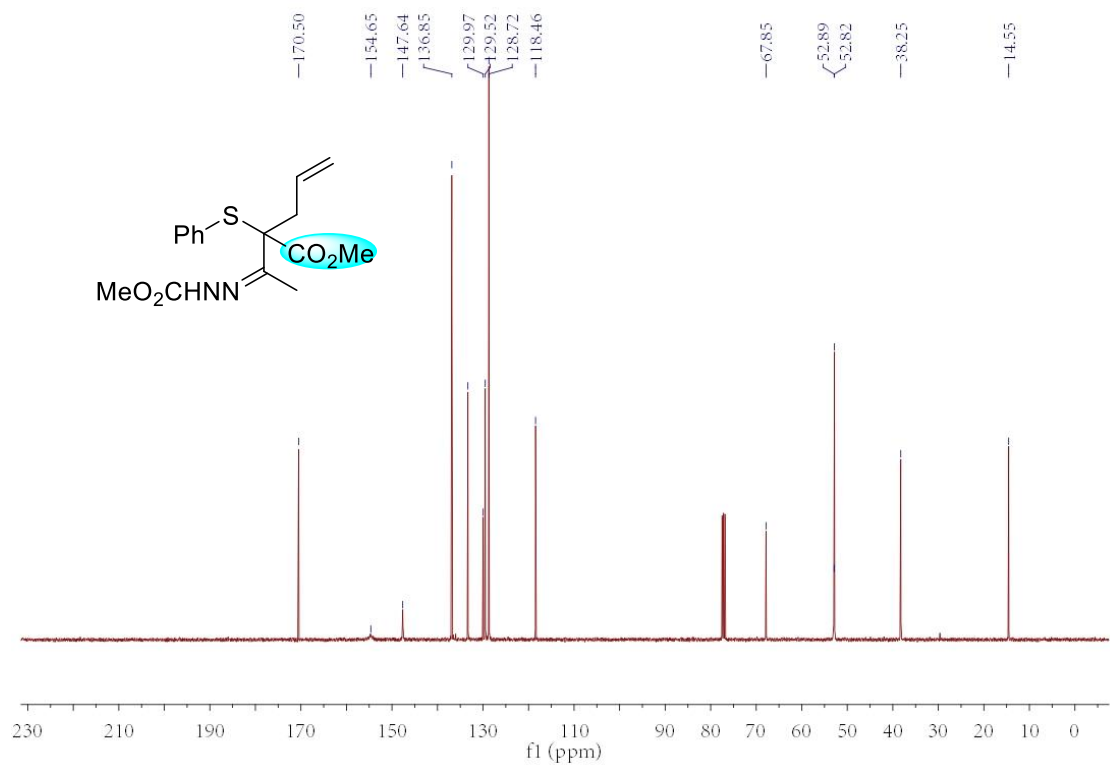

3f

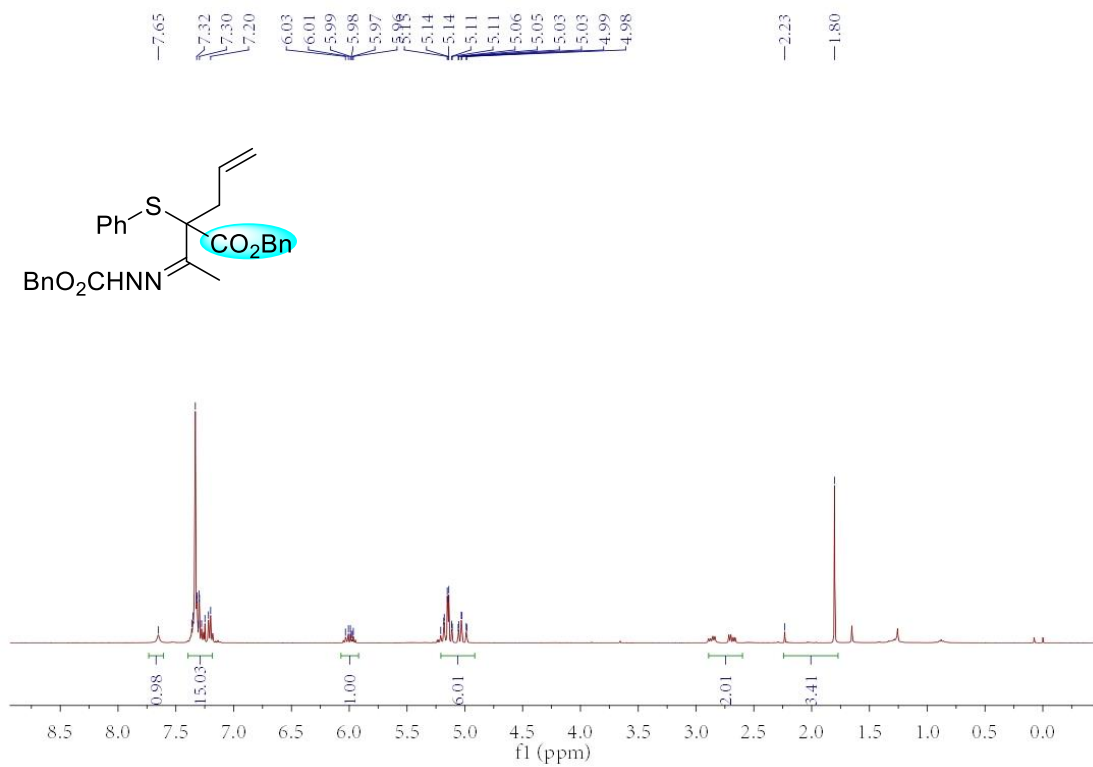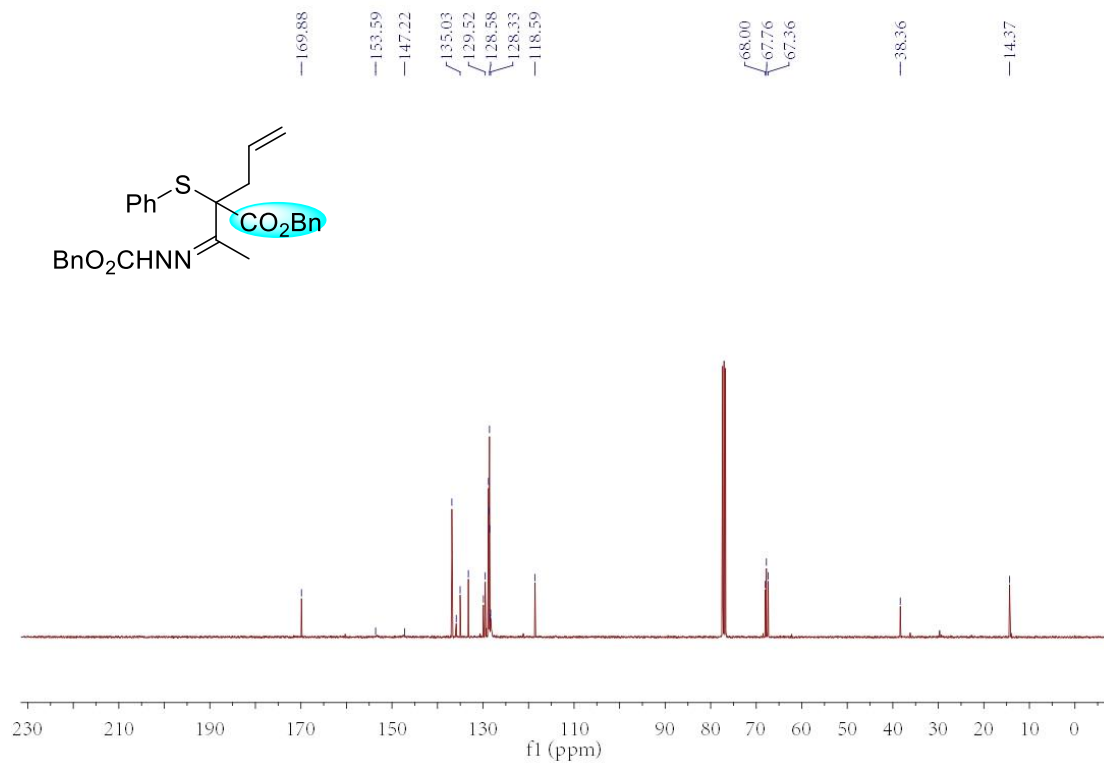

3g

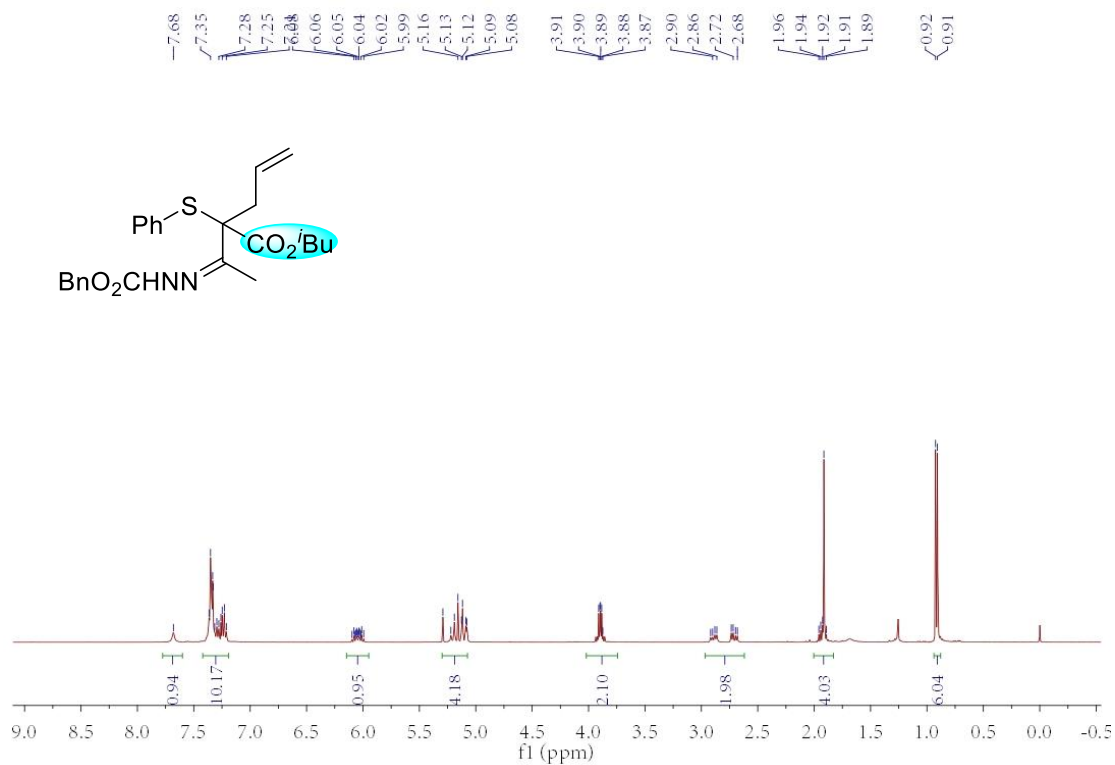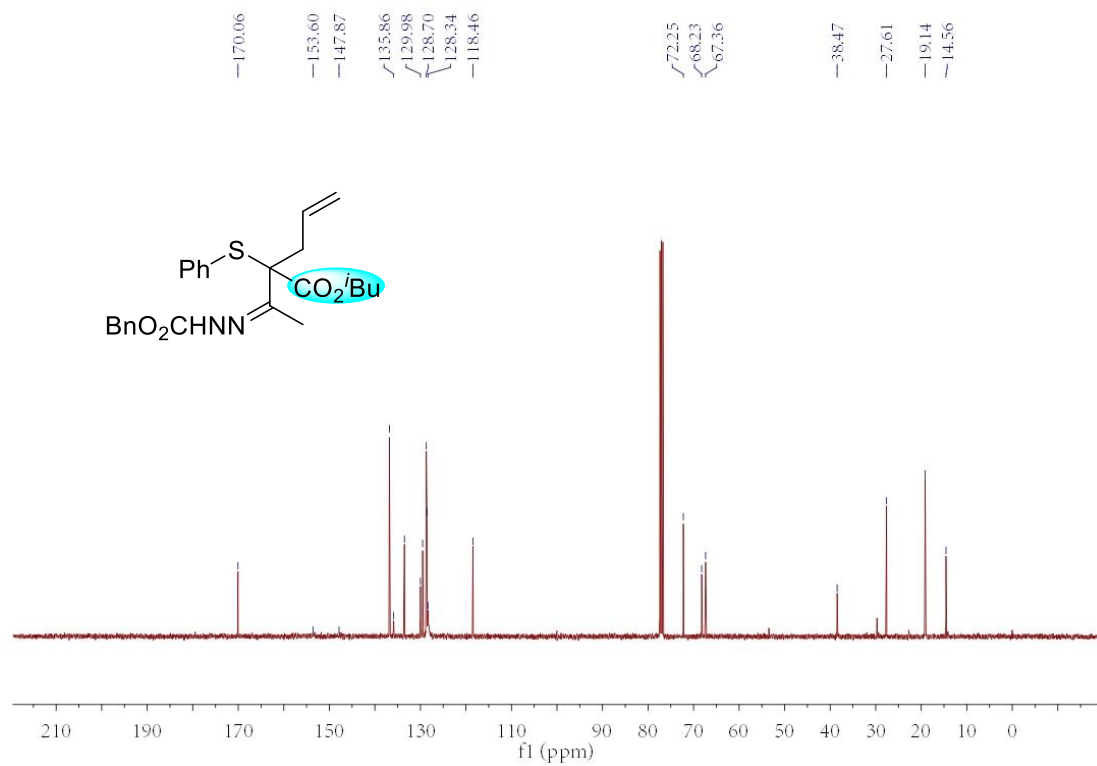

3h

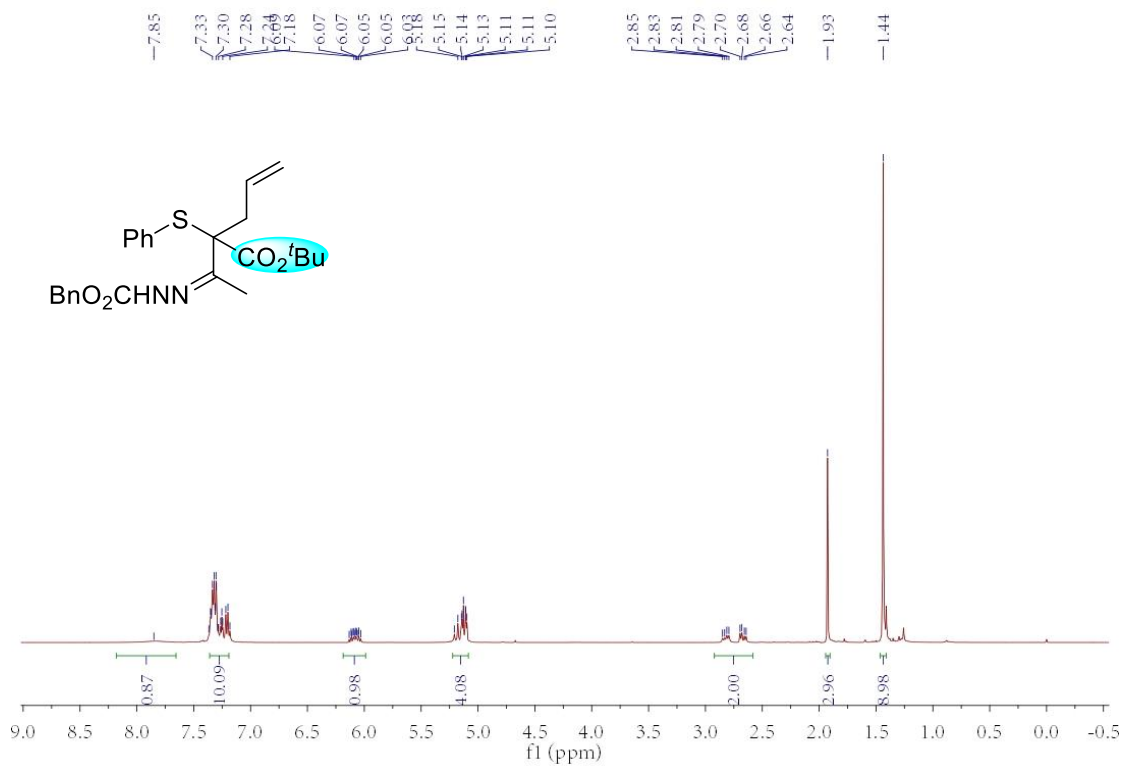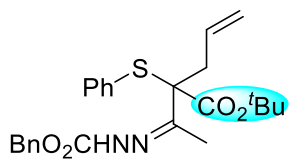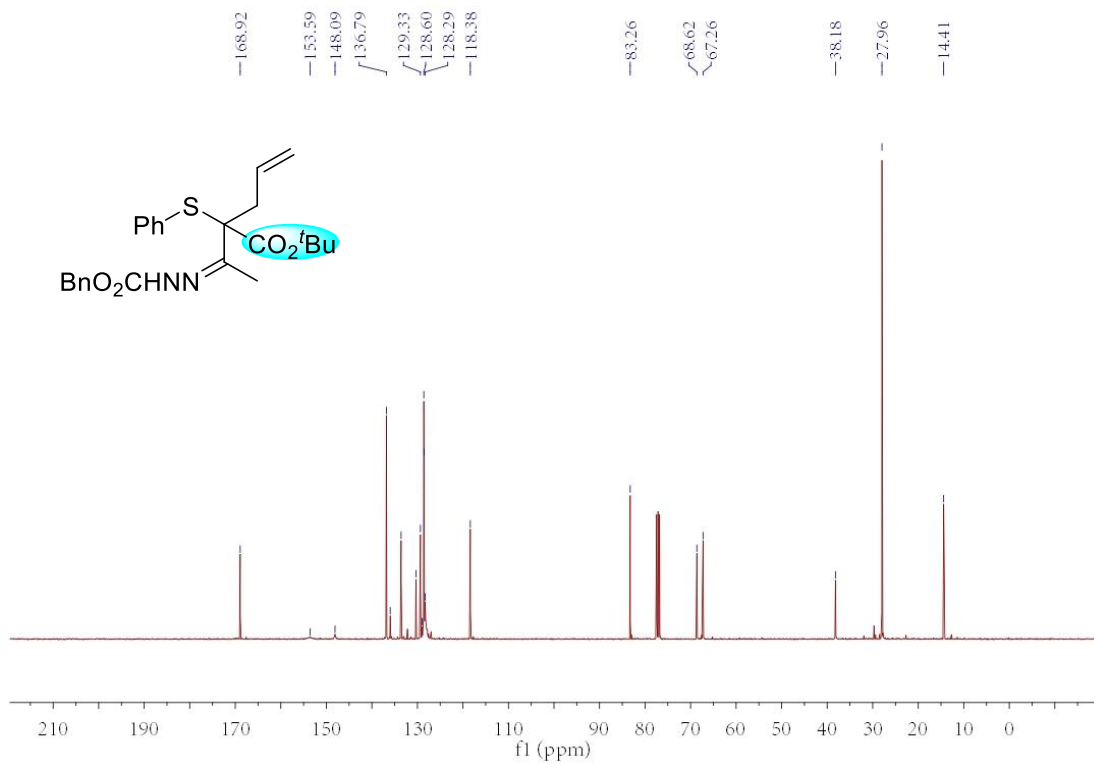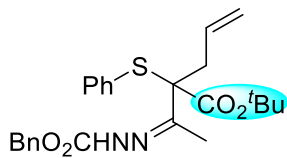

3i

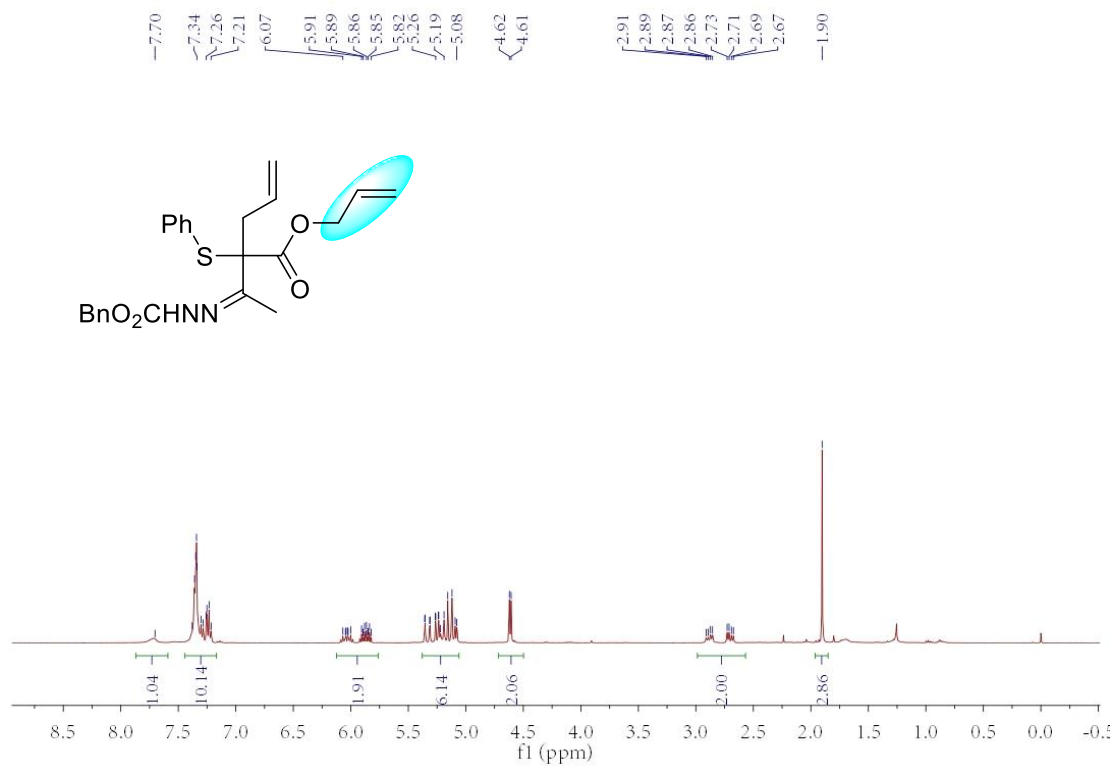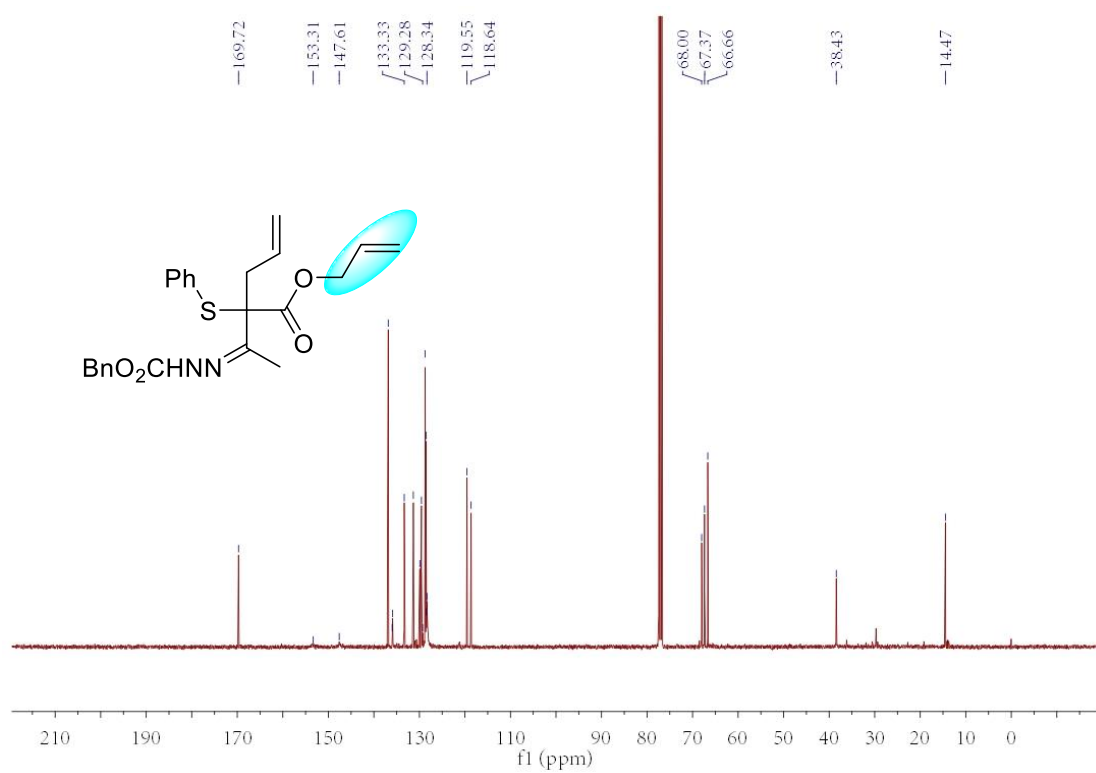

3j

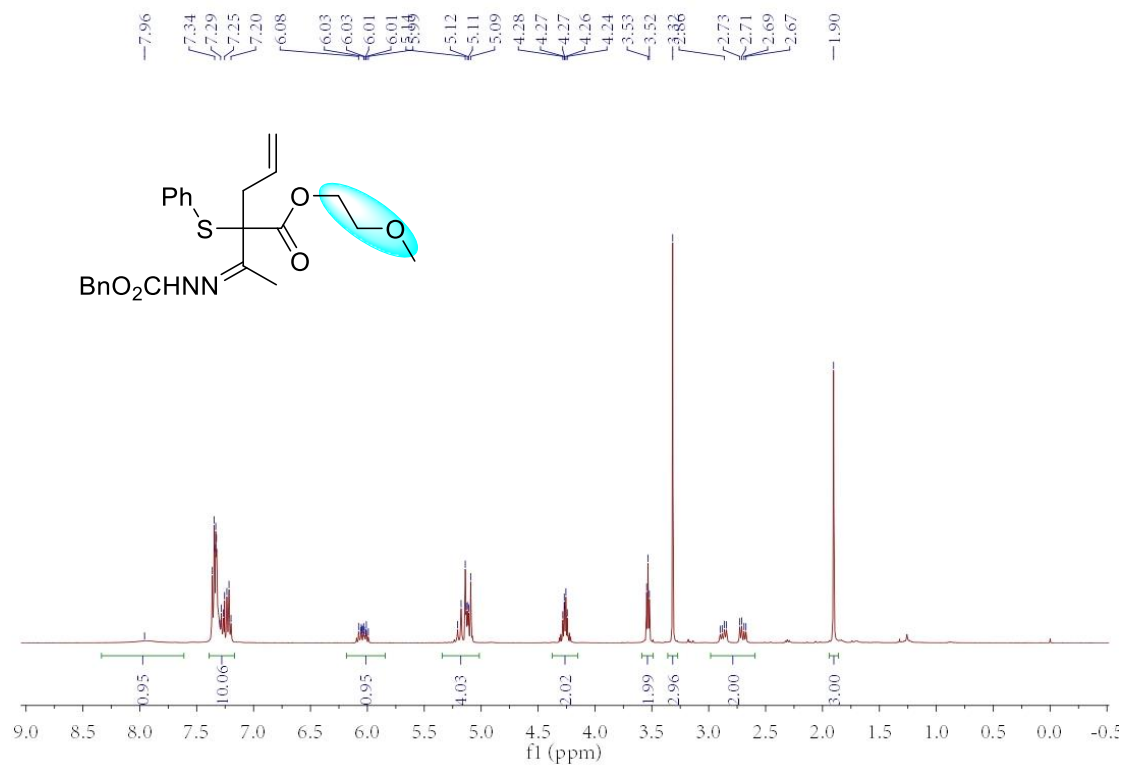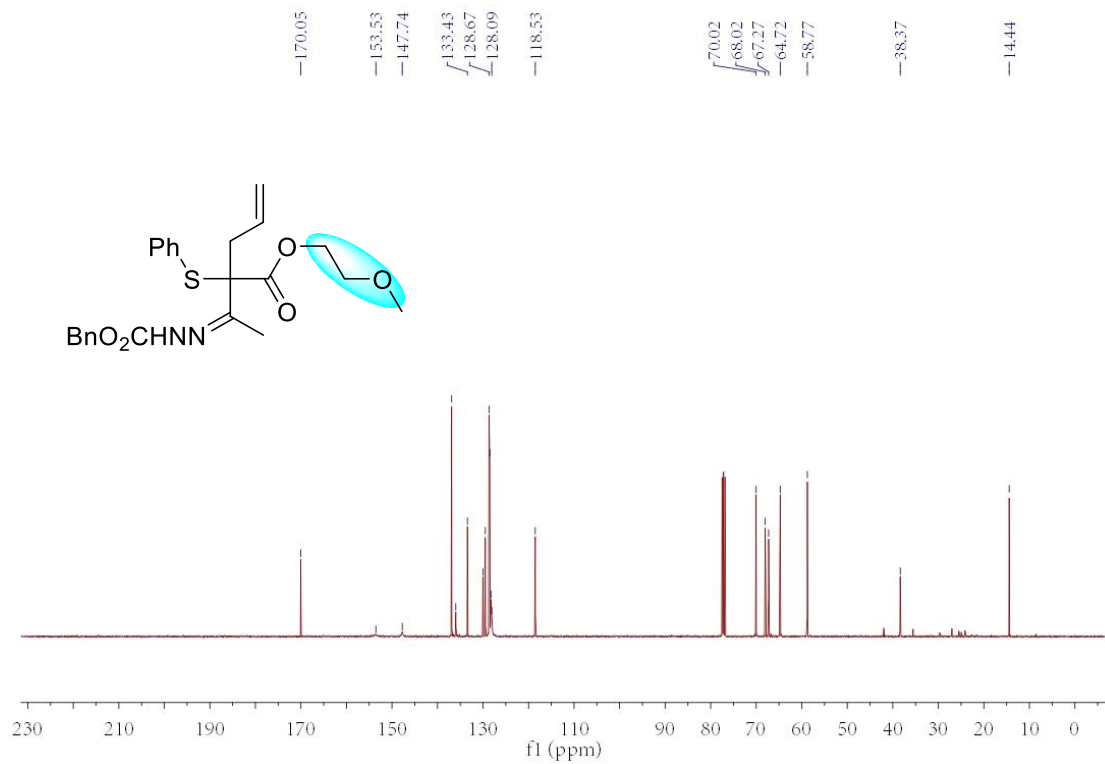

3k

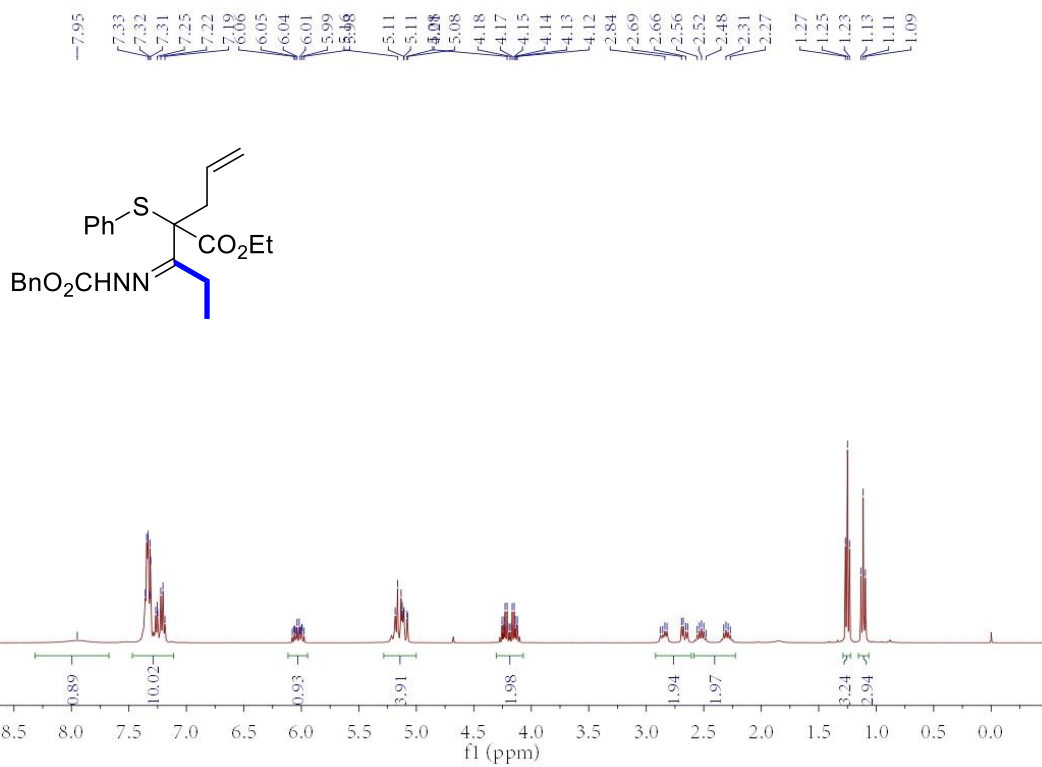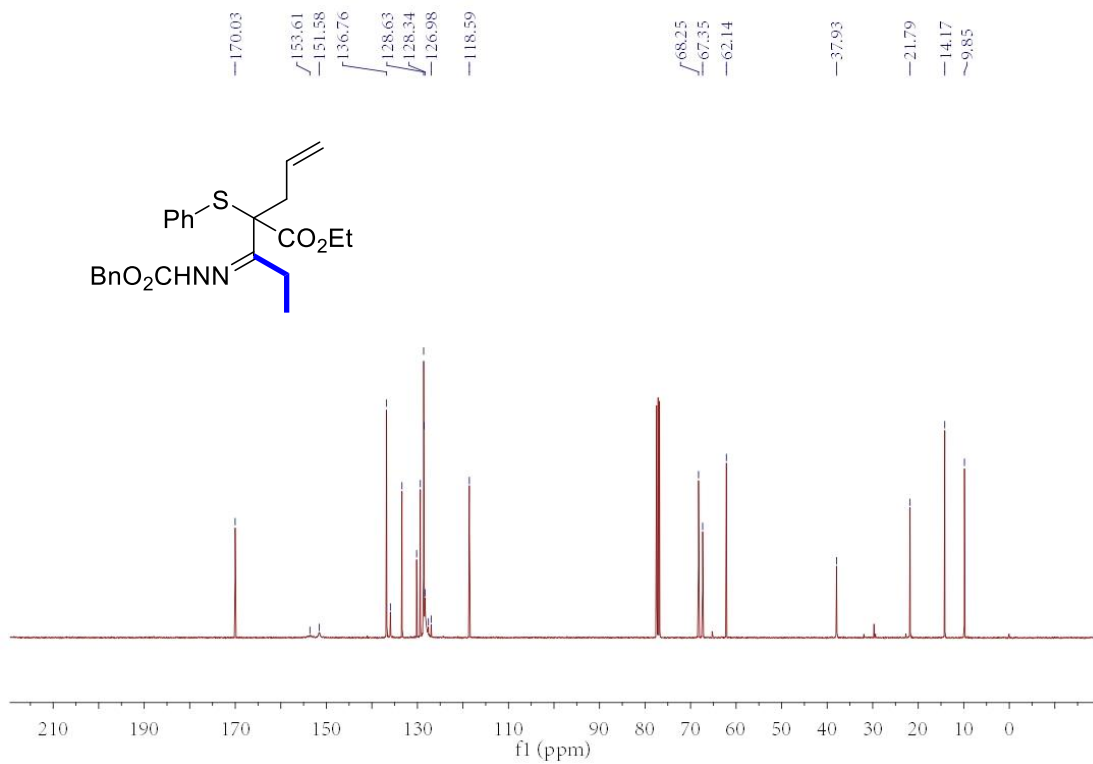

3l

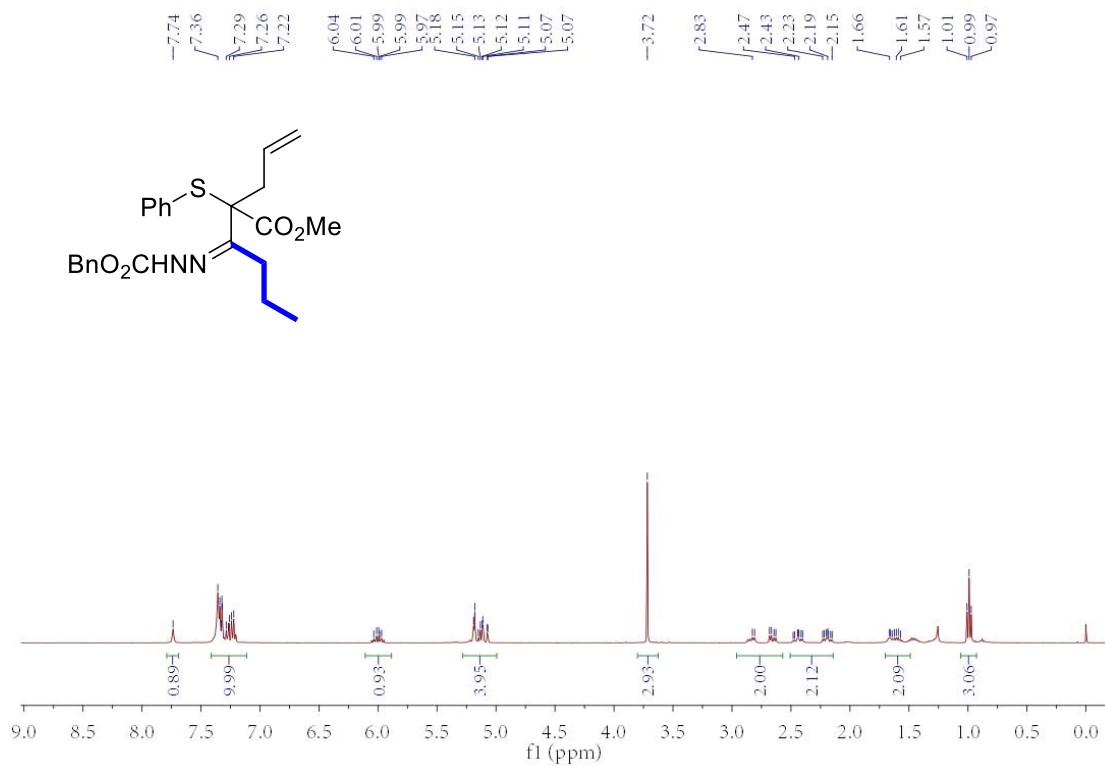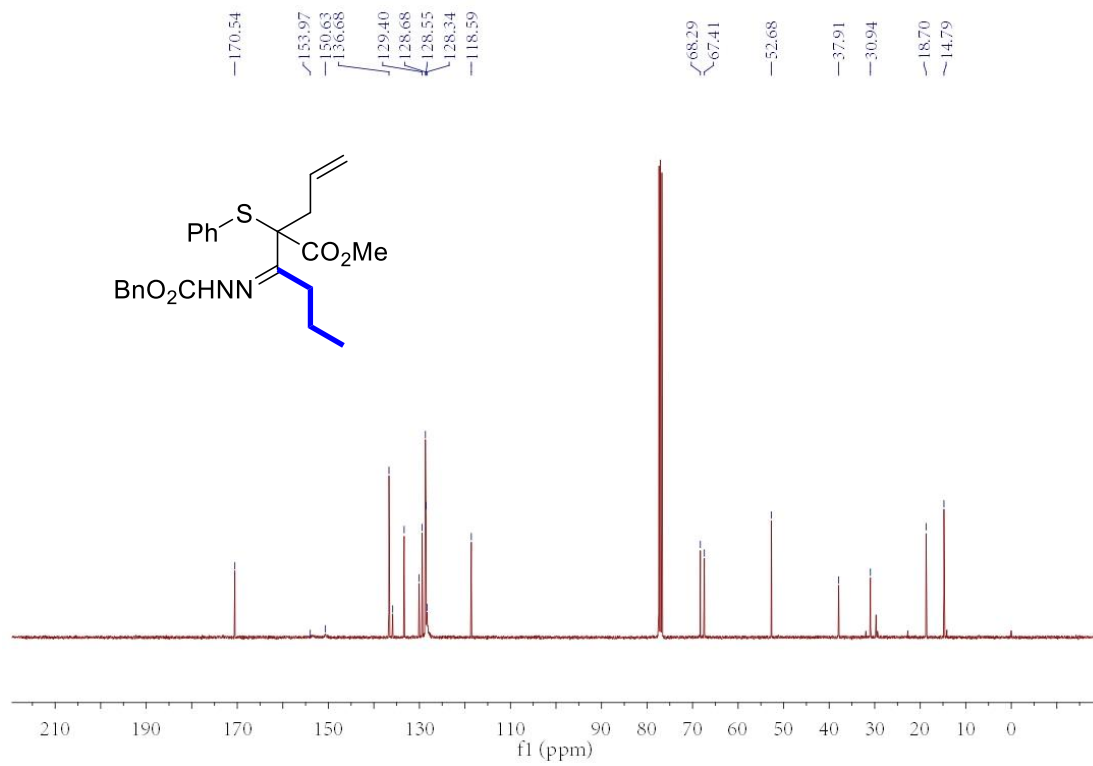



**3m**

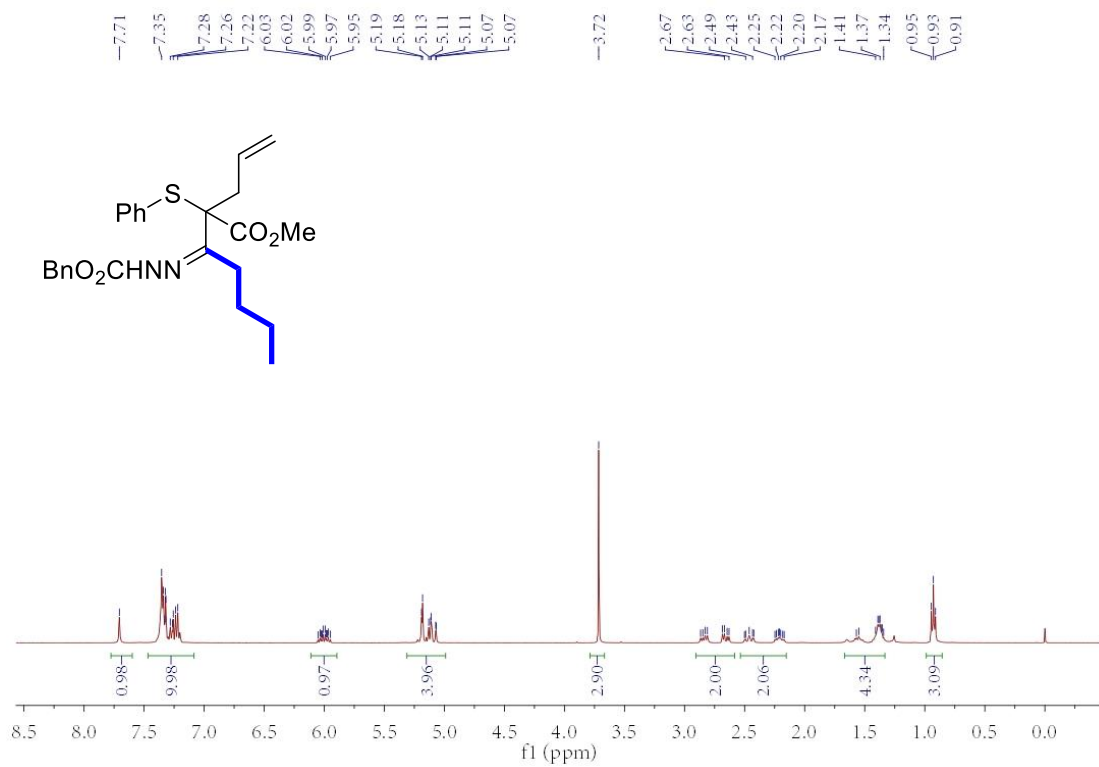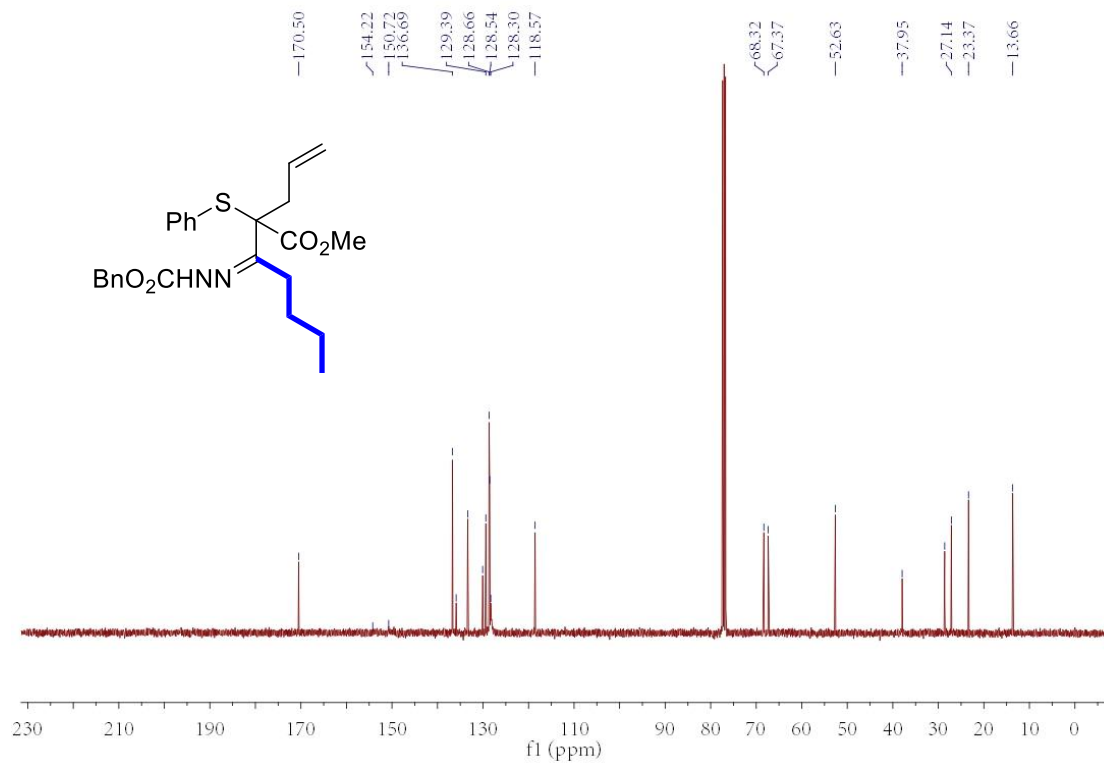

3n

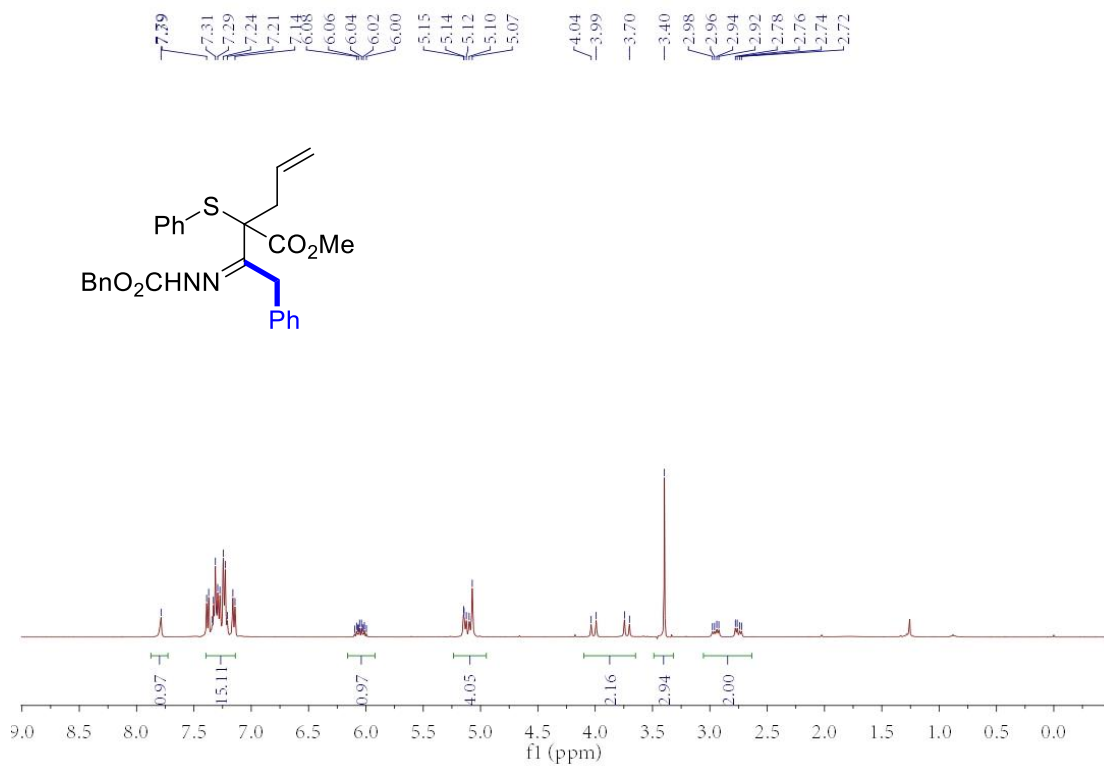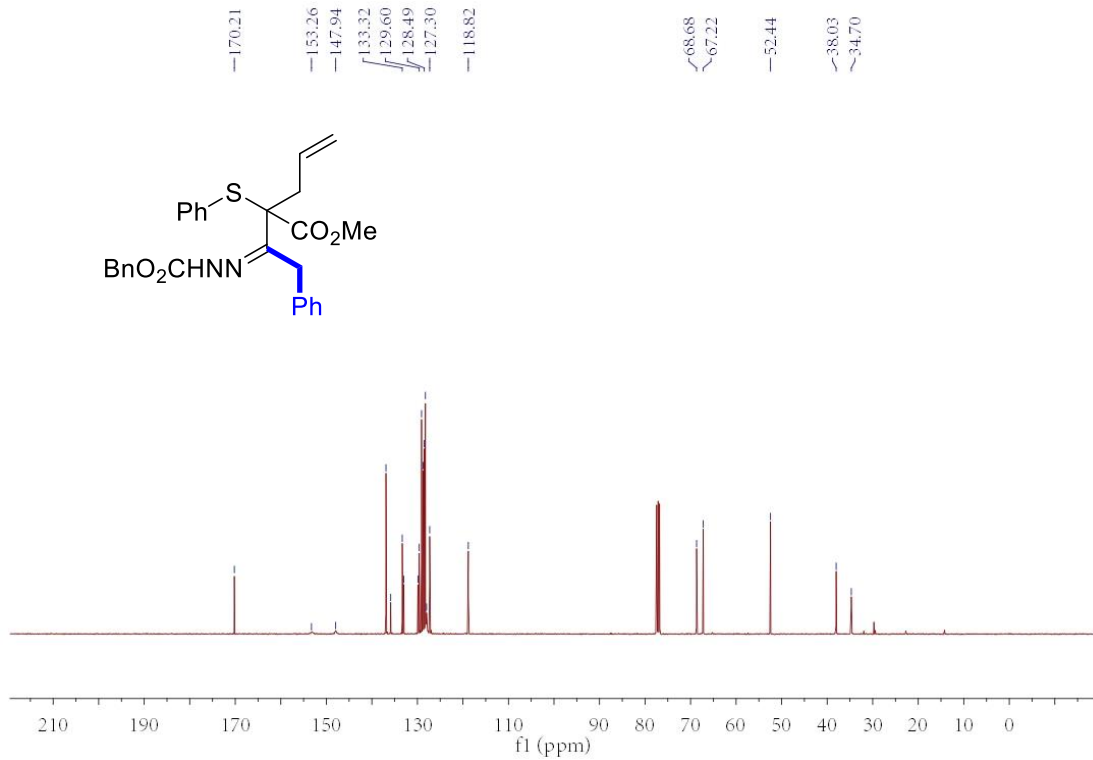

**30**, R = NHCO<sub>2</sub>Bn

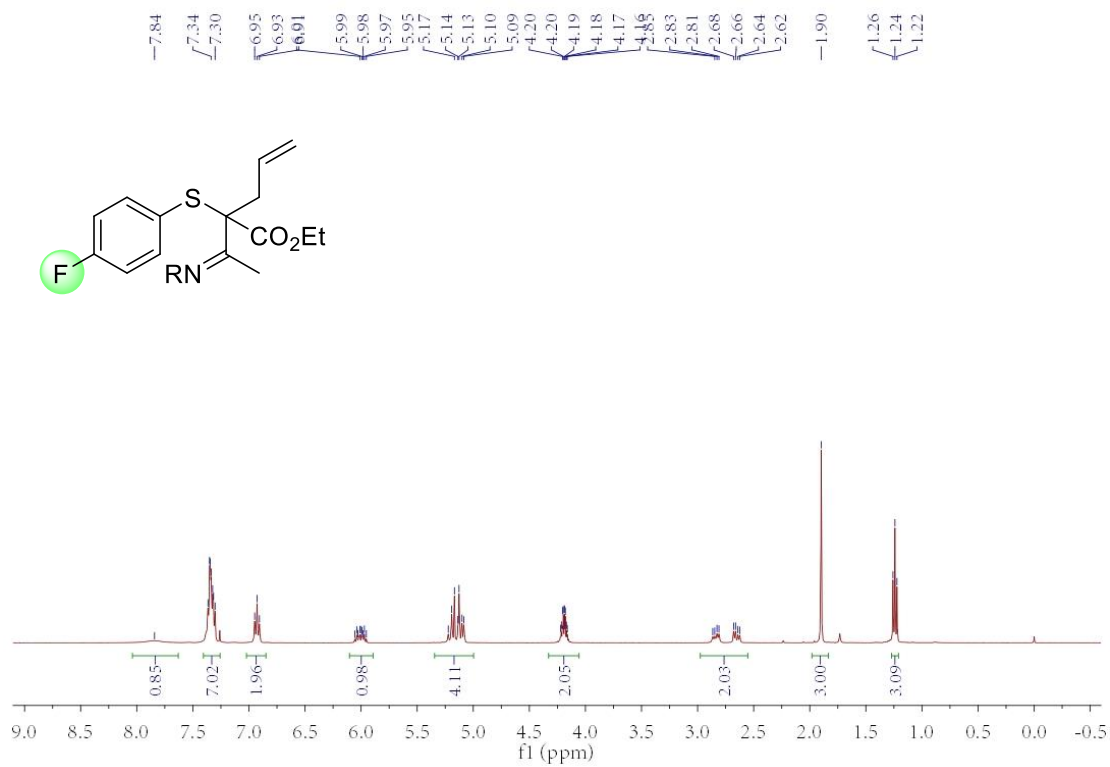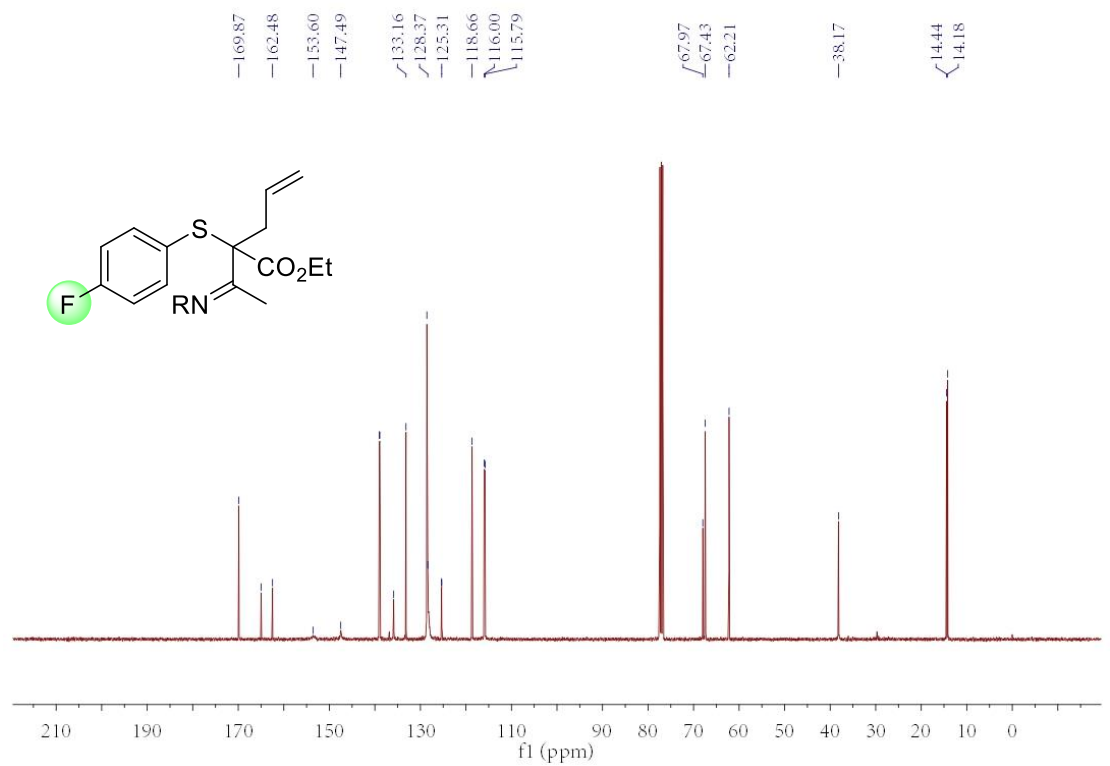

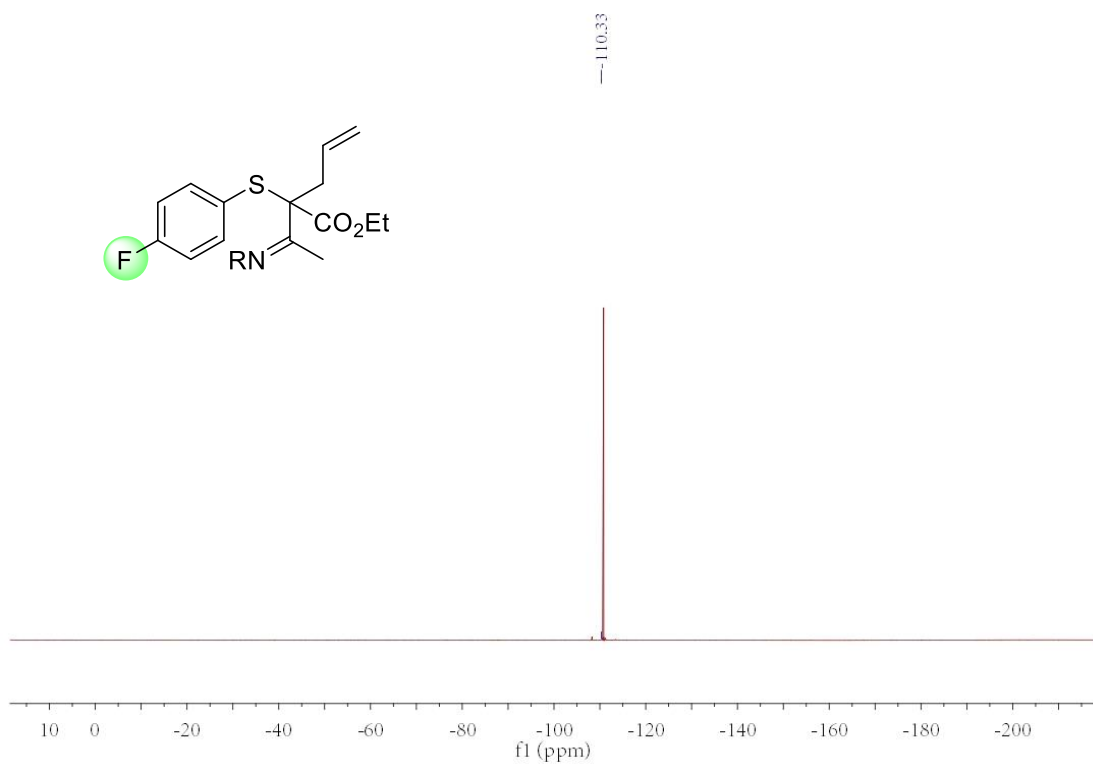

**3p**, R = NHCO<sub>2</sub>Bn

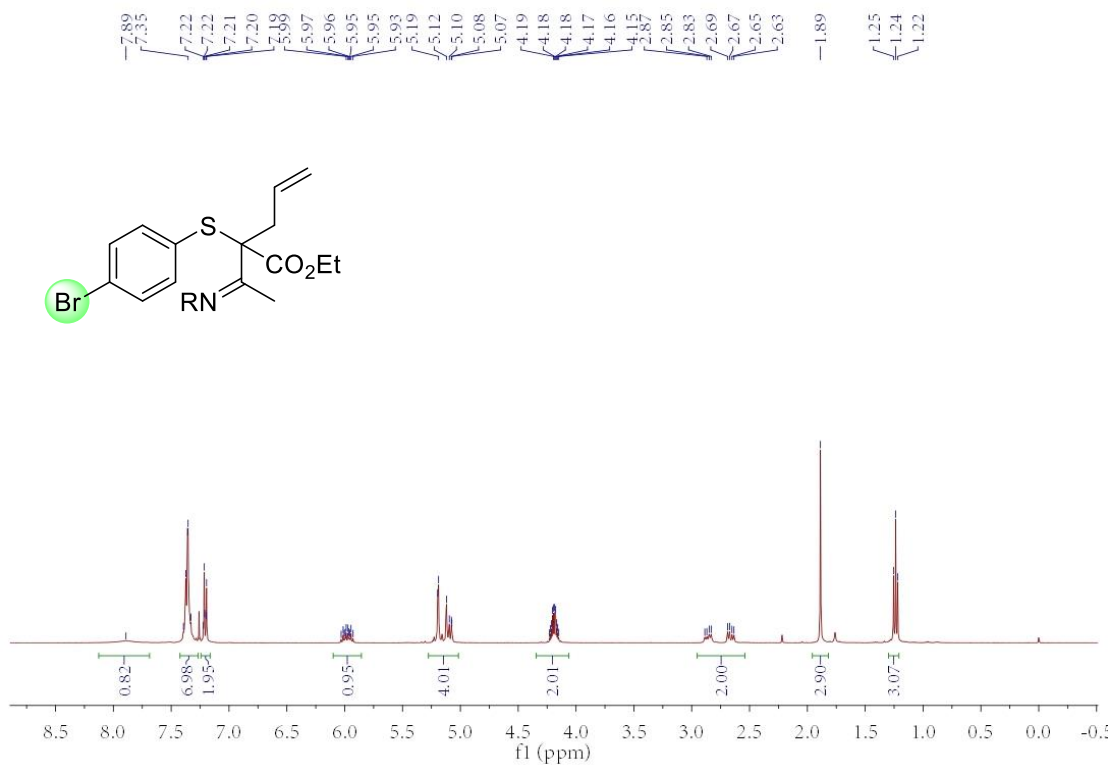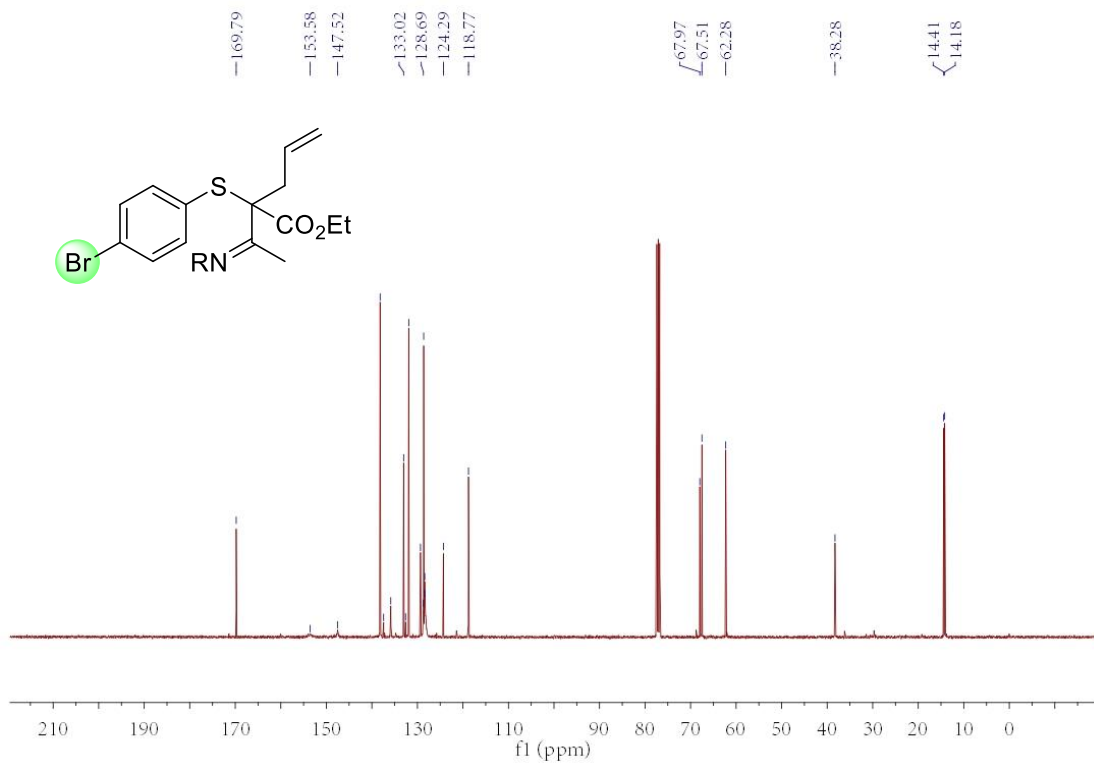

**3q**, R = NHCO<sub>2</sub>Bn

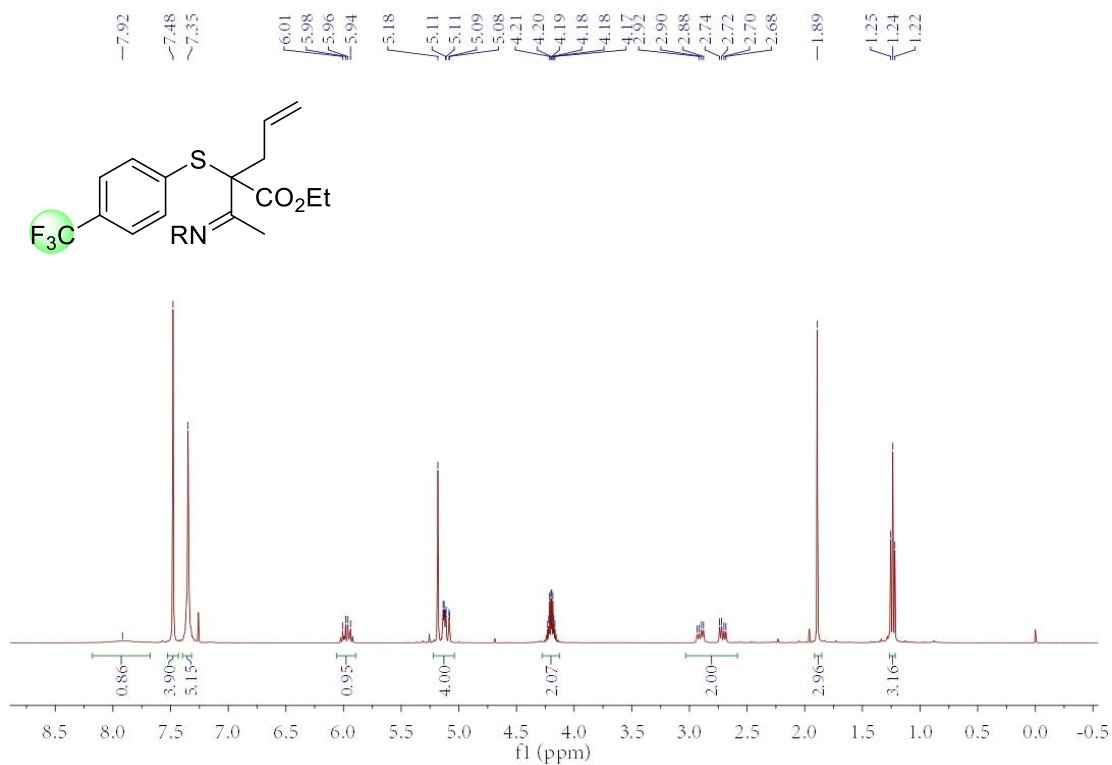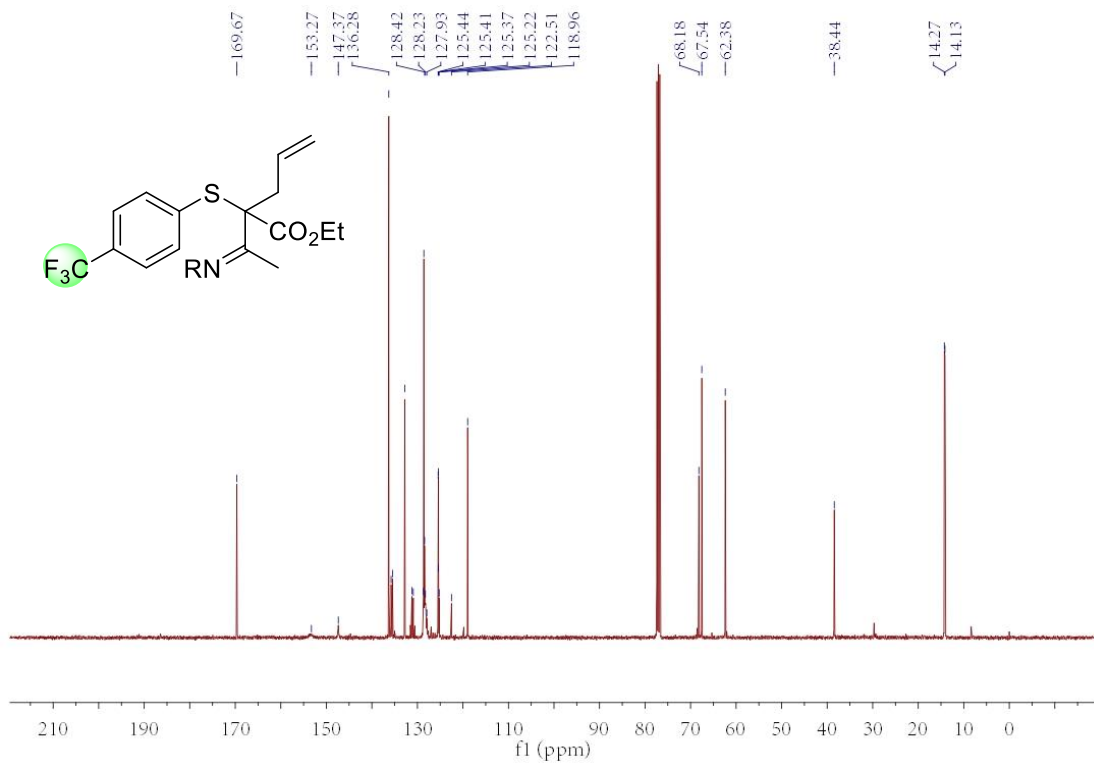

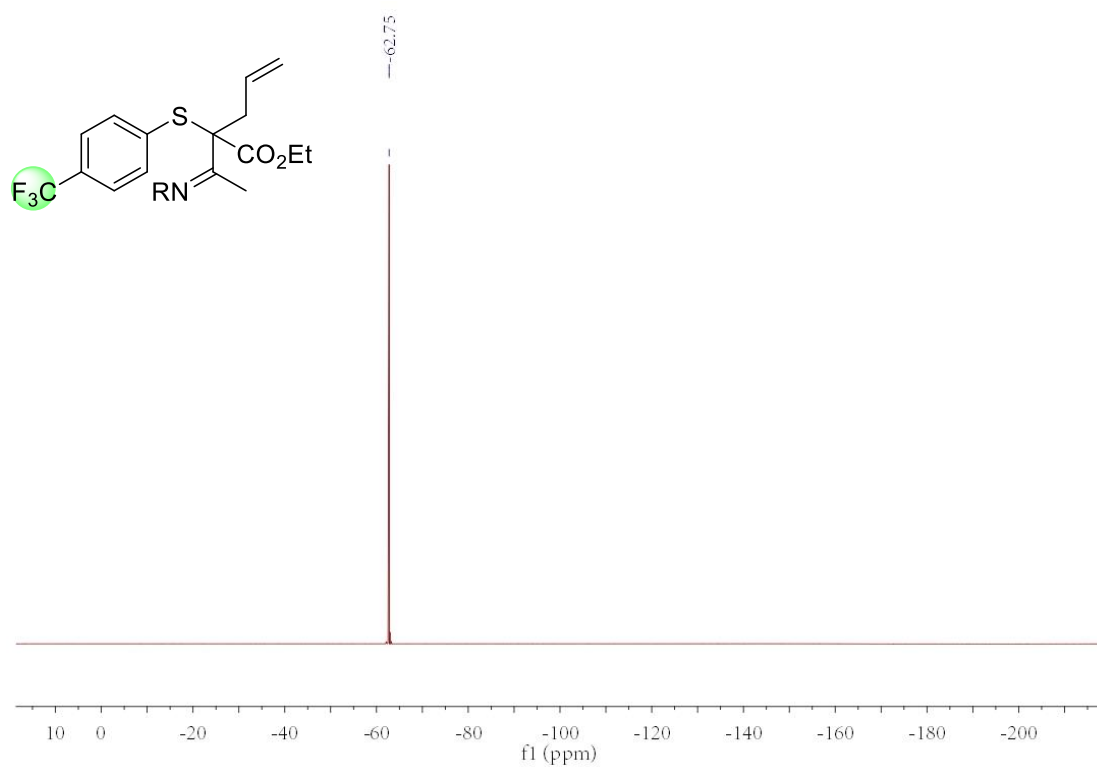

**3r**, R = NHCO<sub>2</sub>Bn

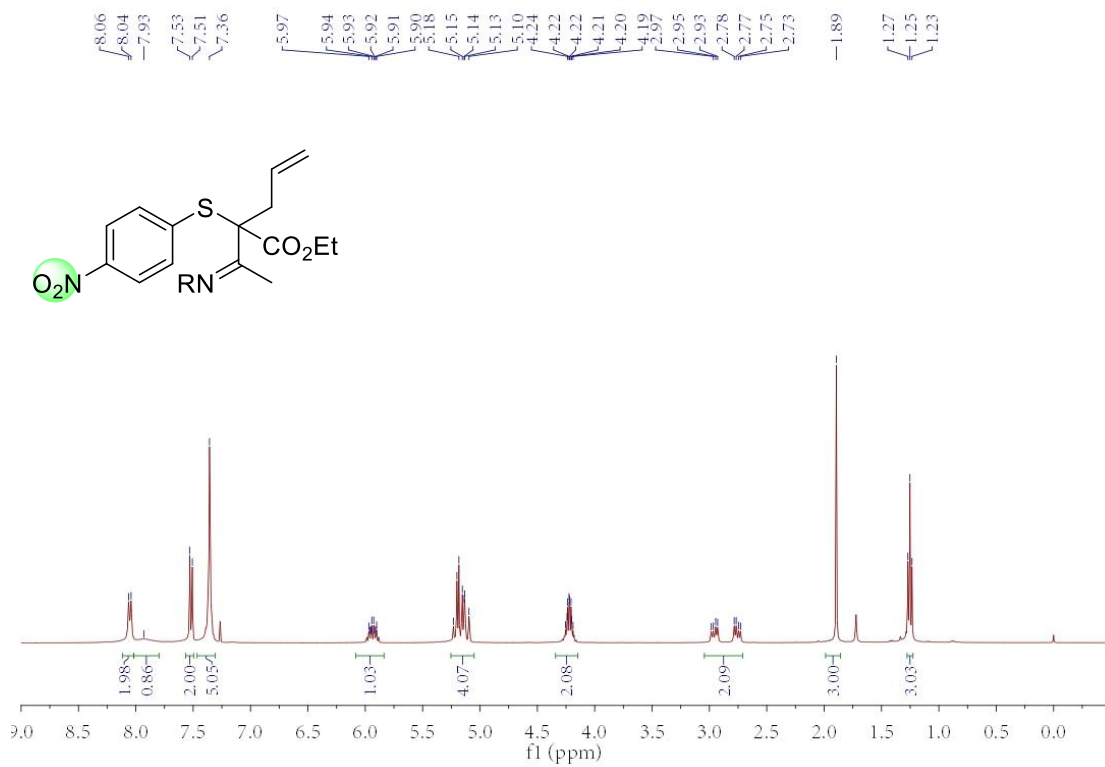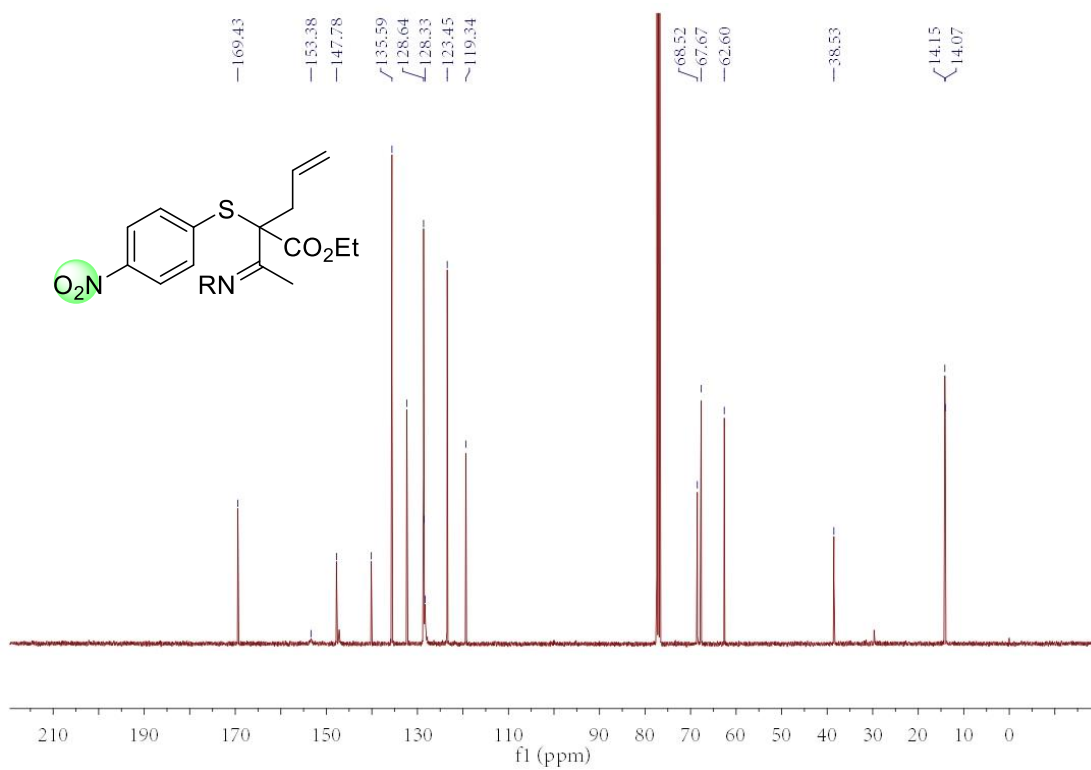



**3s**, R = NHCO<sub>2</sub>Bn

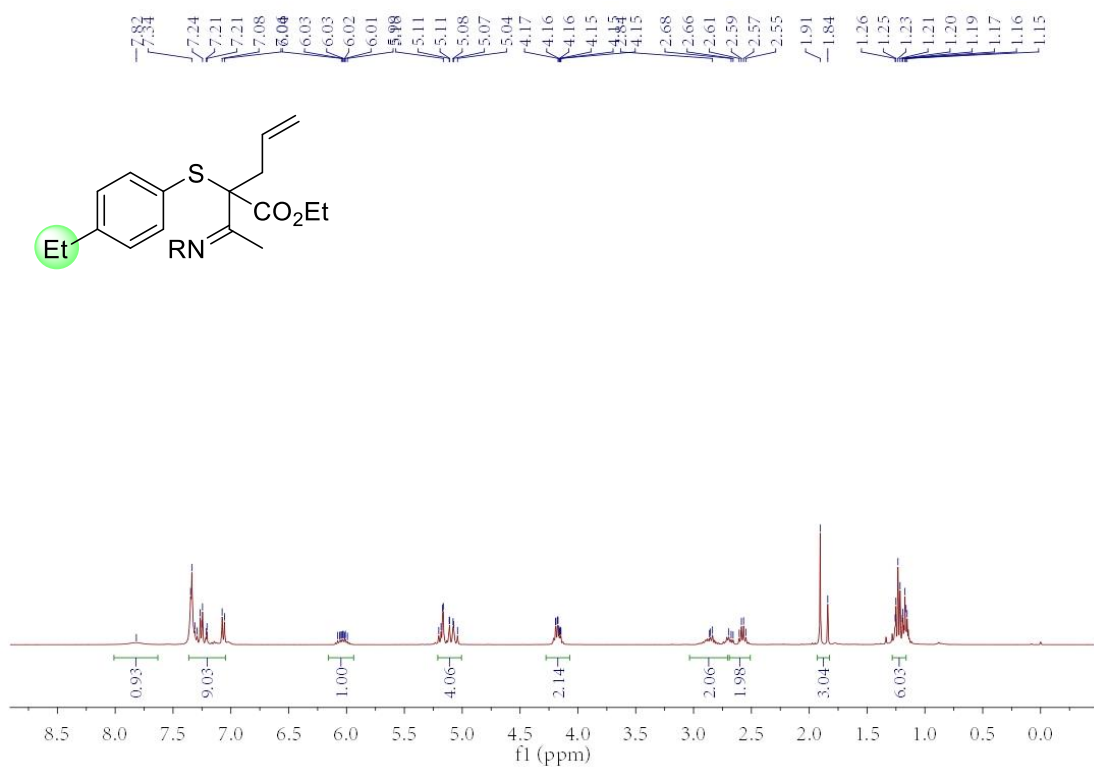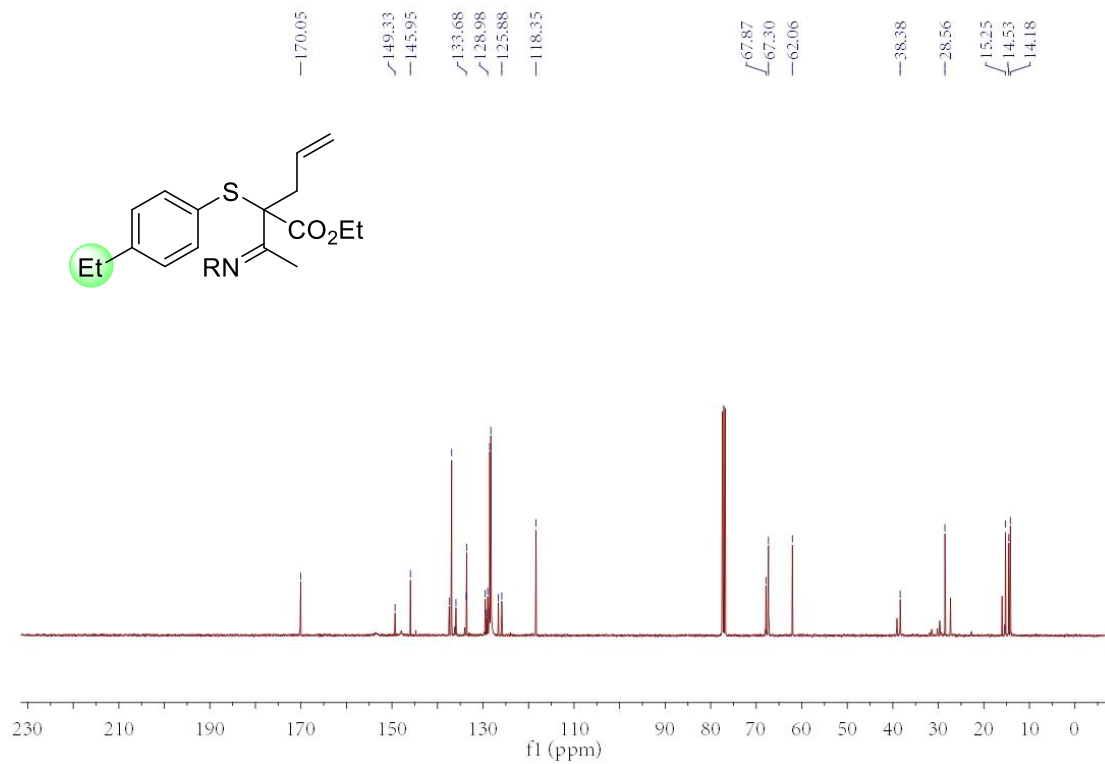

**3t**, R = NHCO<sub>2</sub>Bn

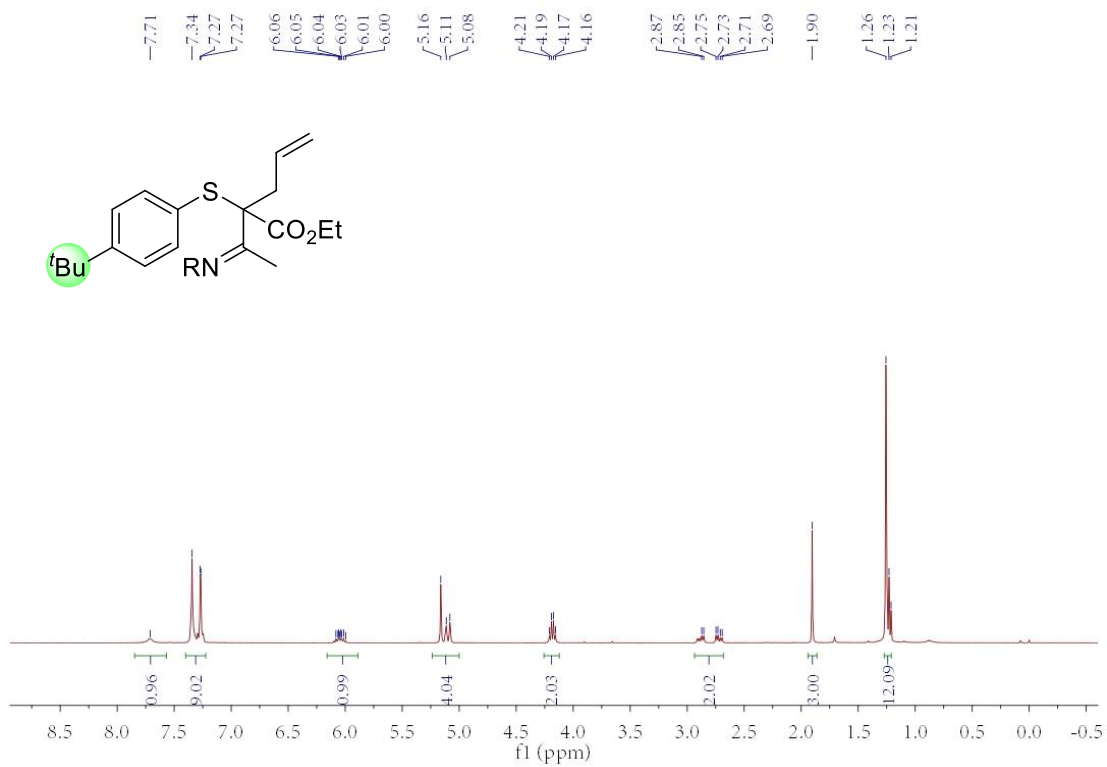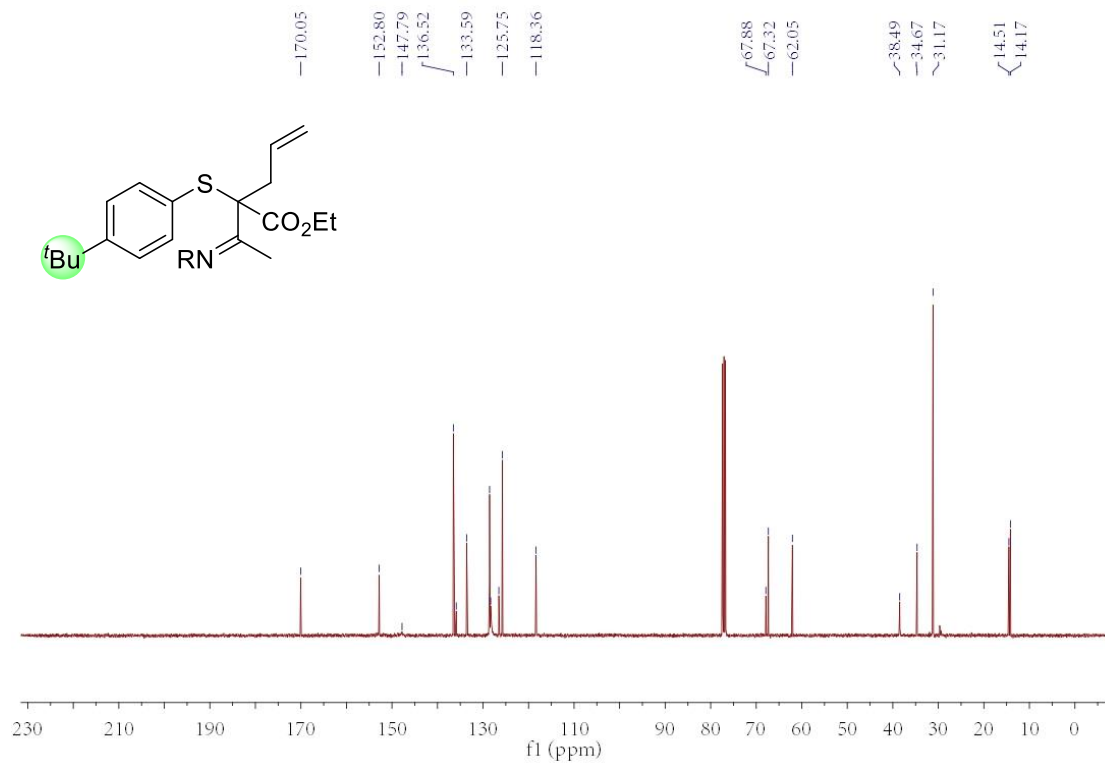

**3u**, R = NHCO<sub>2</sub>Bn

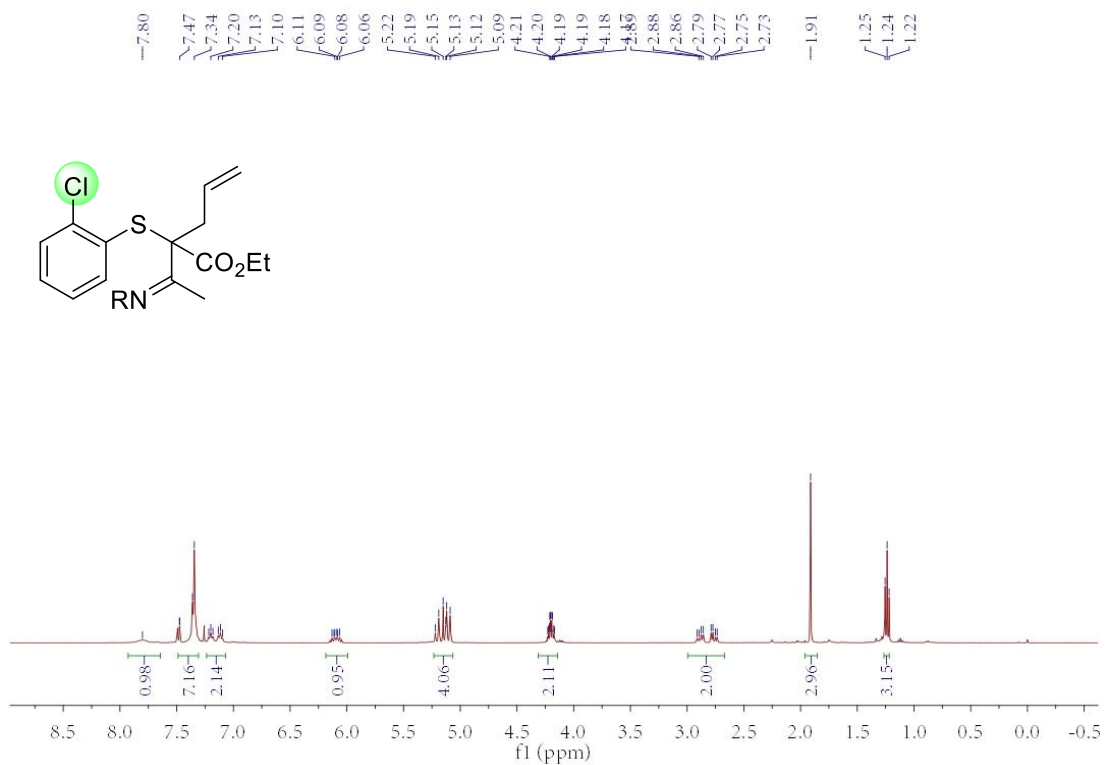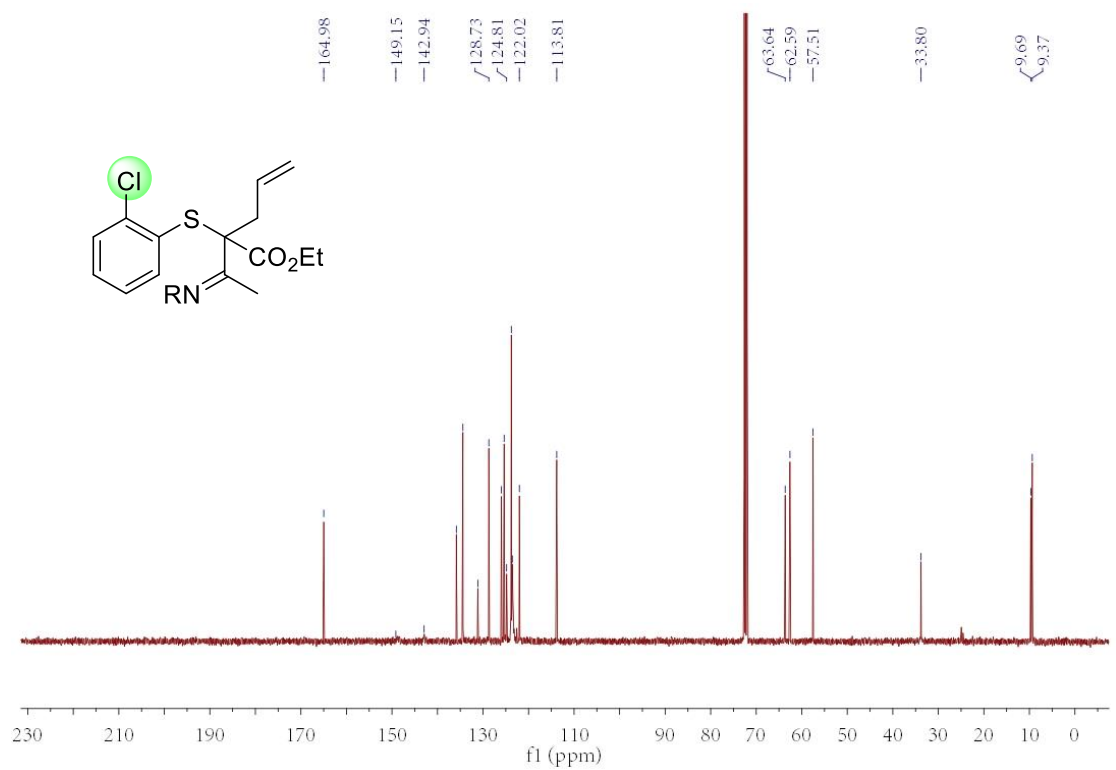

**3v**, R = NHCO<sub>2</sub>Bn

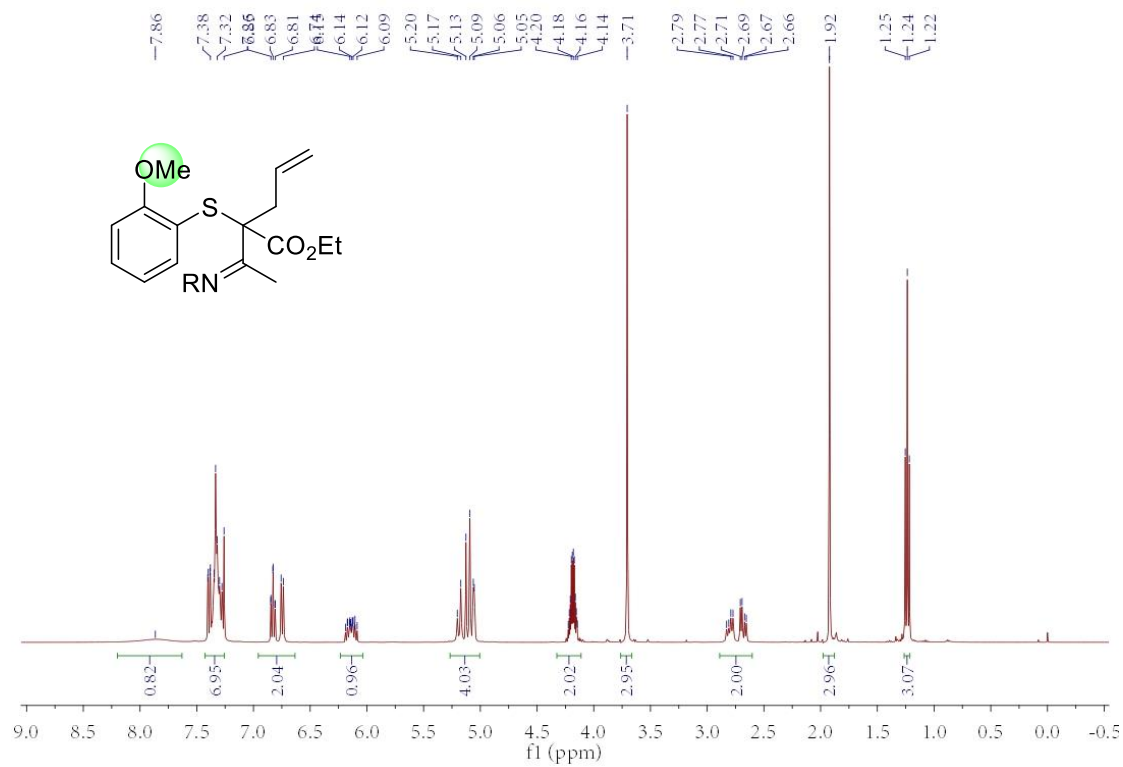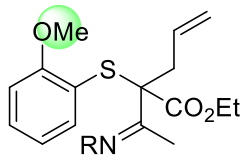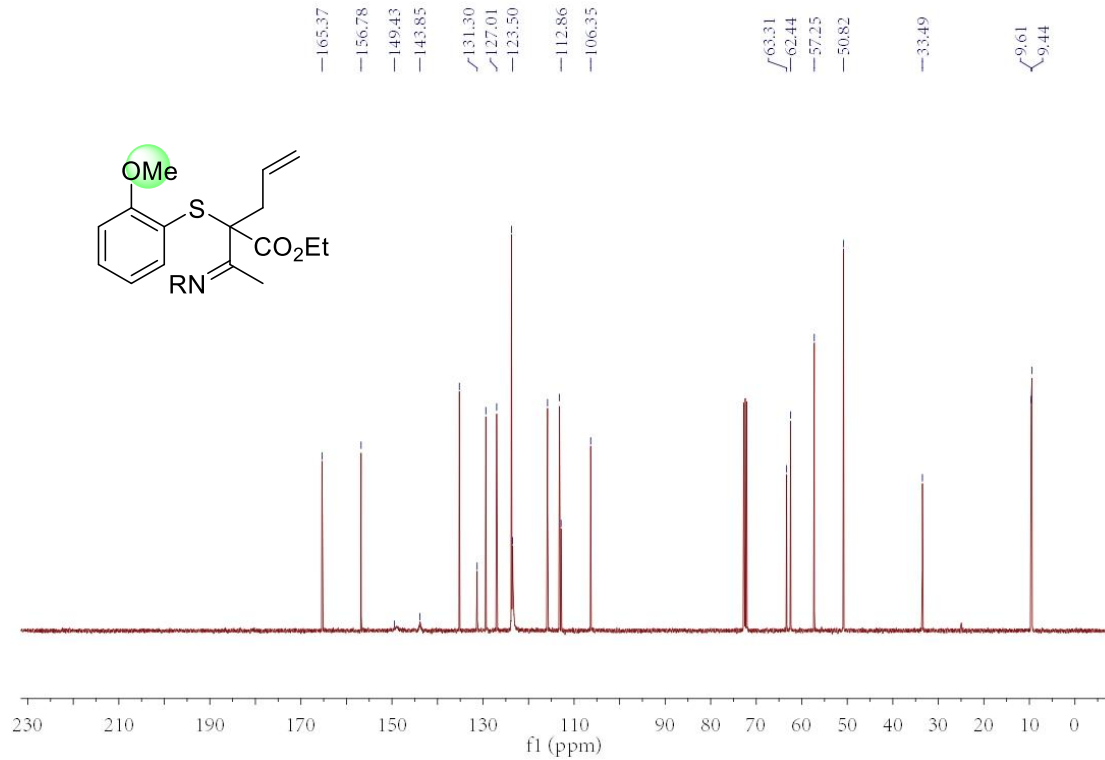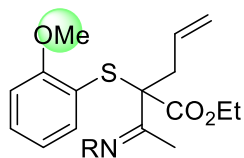

**3w**, R = NHCO<sub>2</sub>Bn

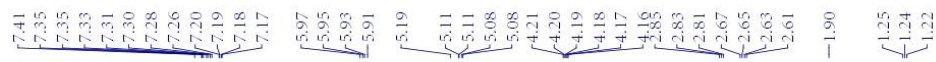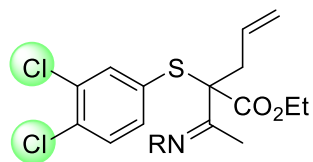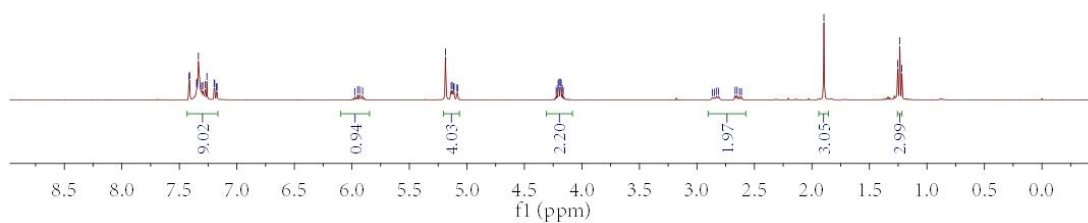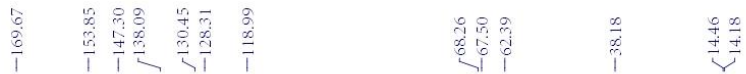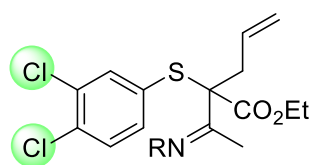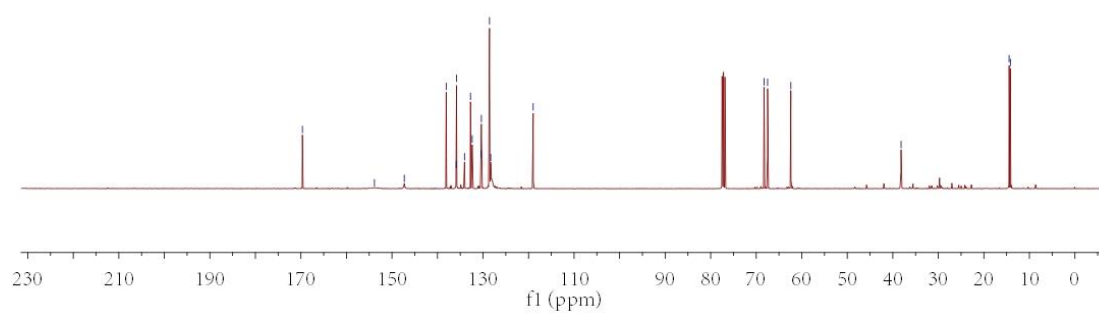

**3x**, R = NHCO<sub>2</sub>Bn

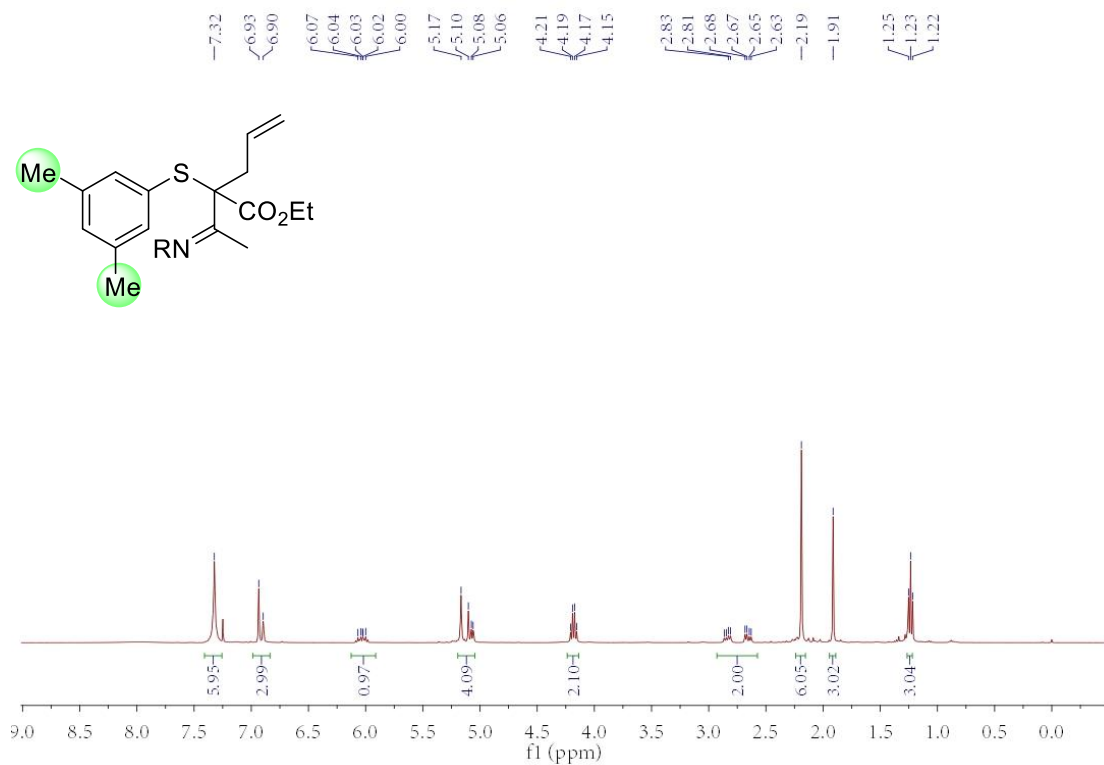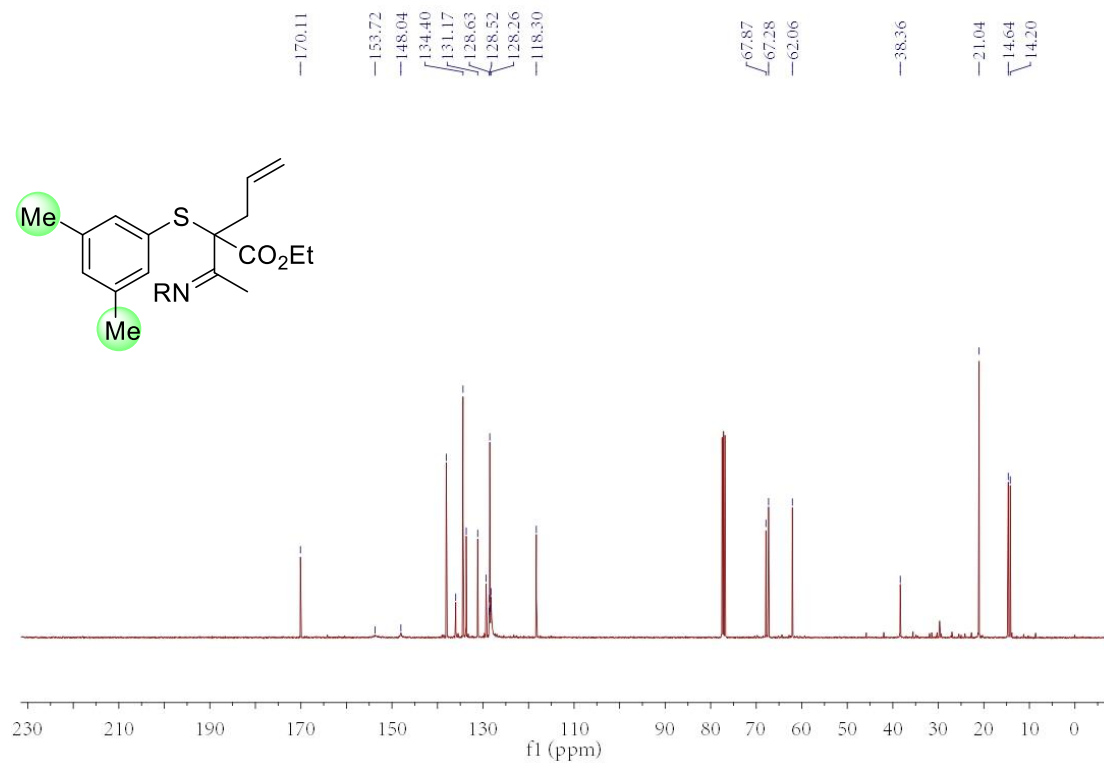

3y

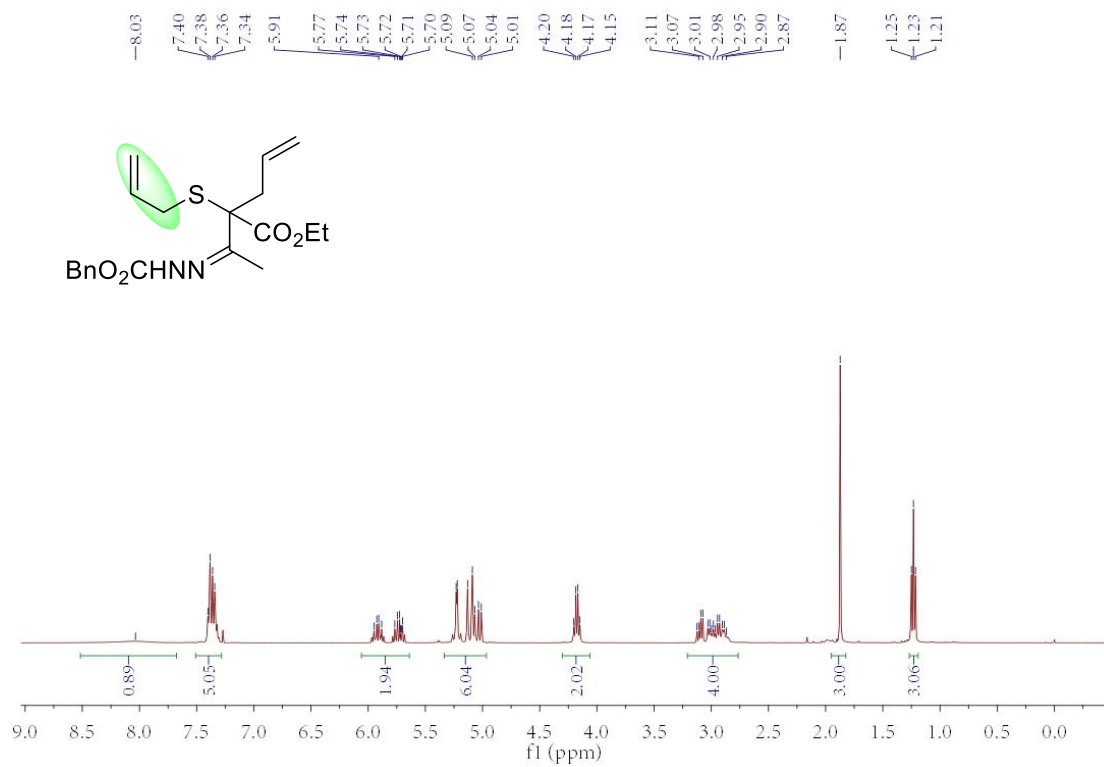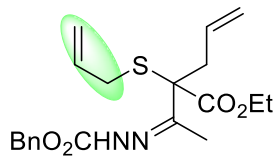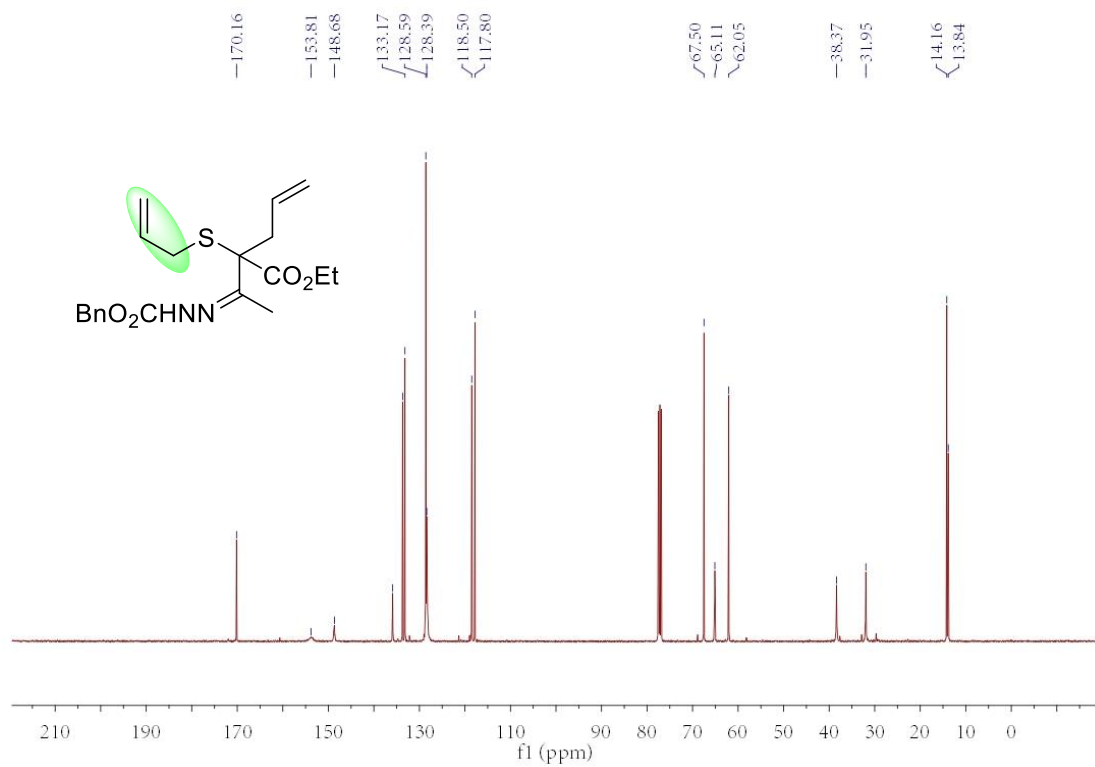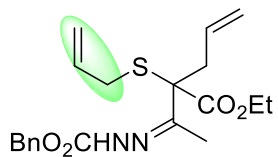

**3z**, R=NHCO<sub>2</sub>Bn

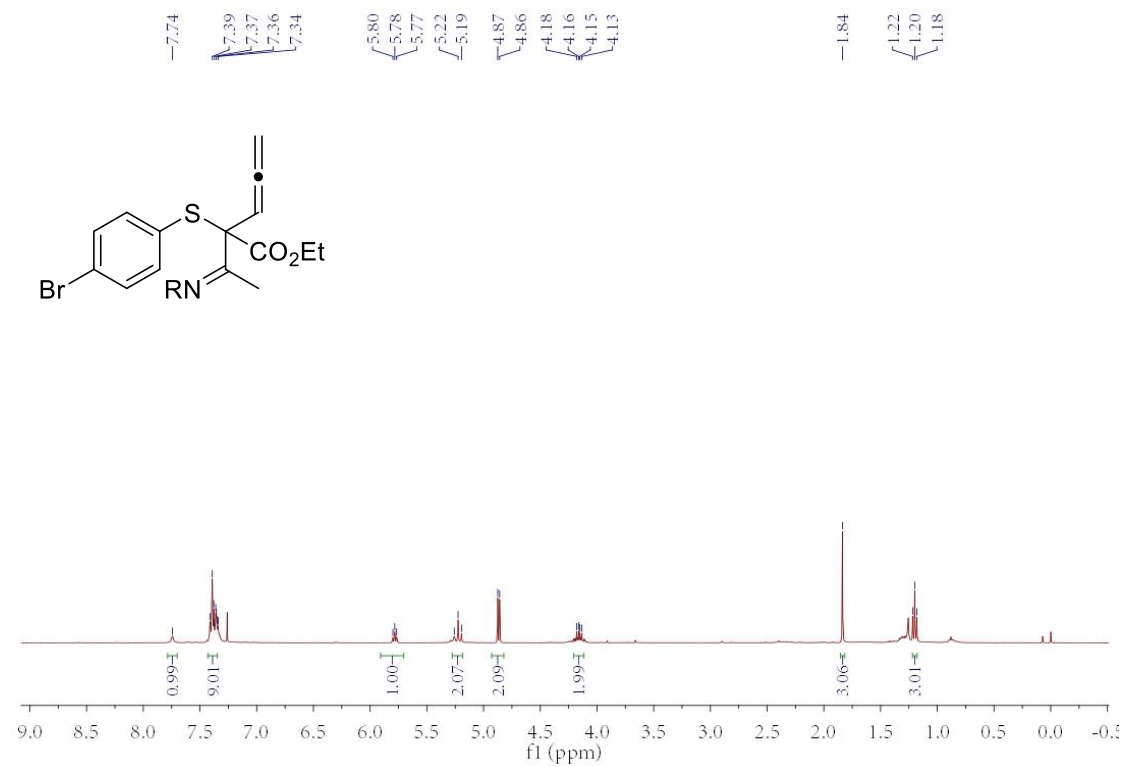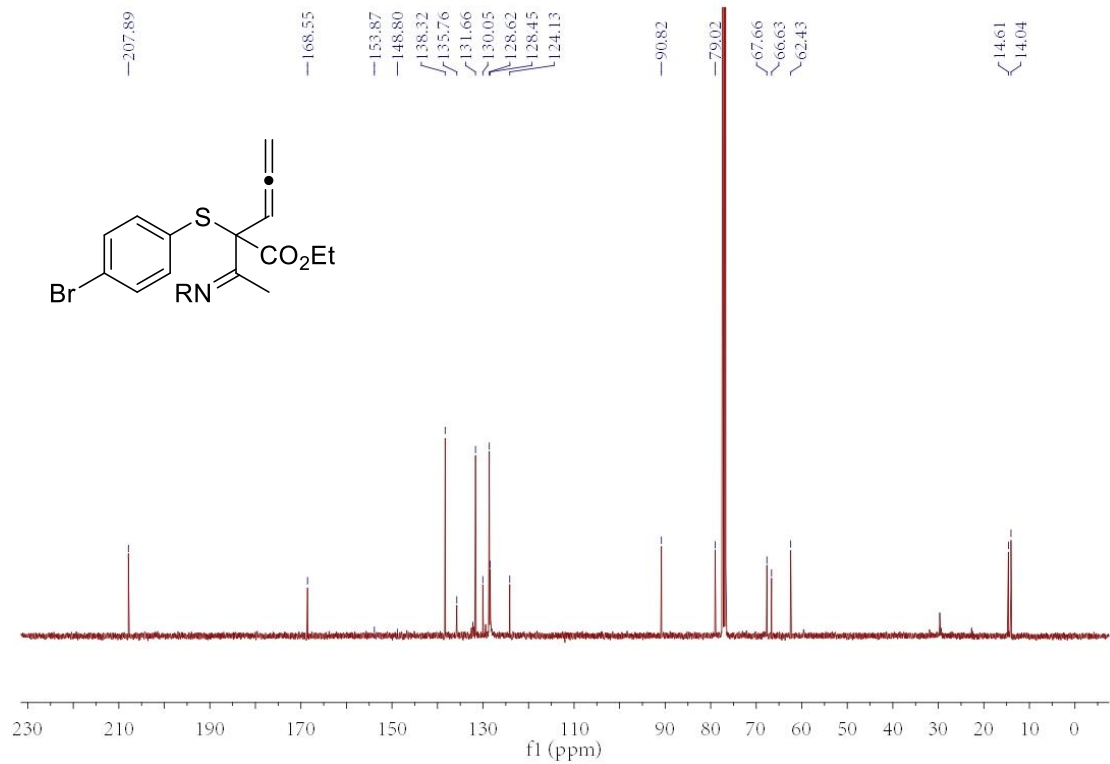



**3a'**, R=NHCO<sub>2</sub>Bn

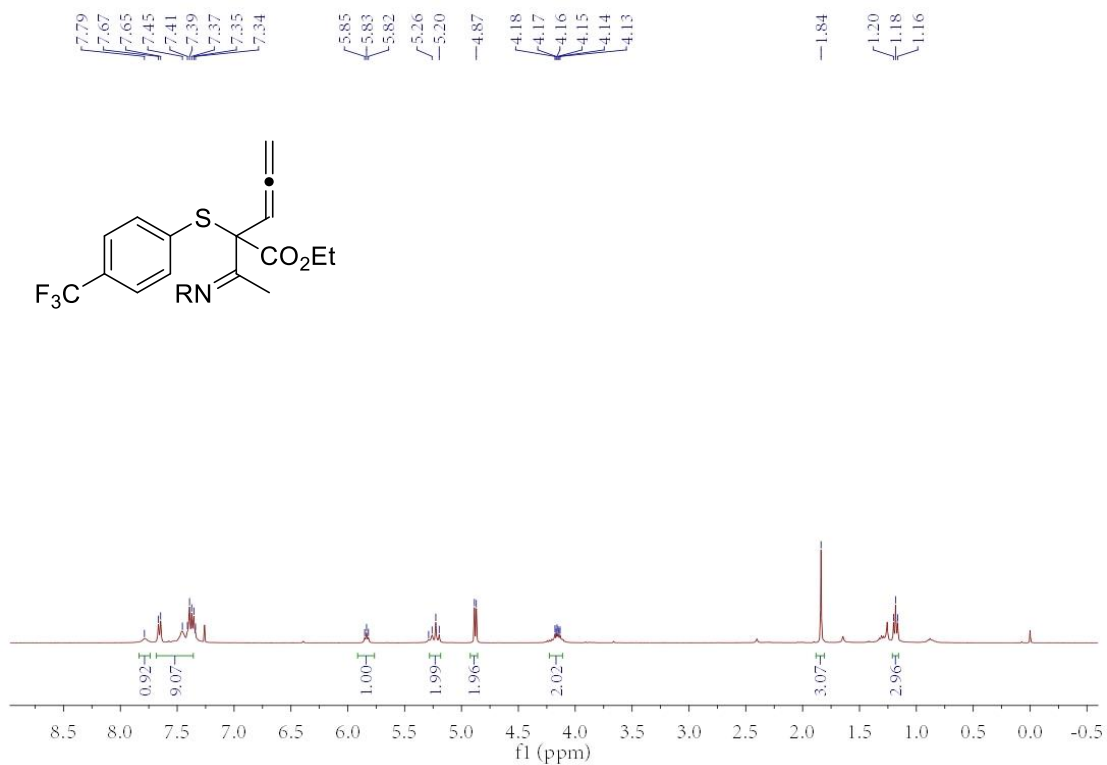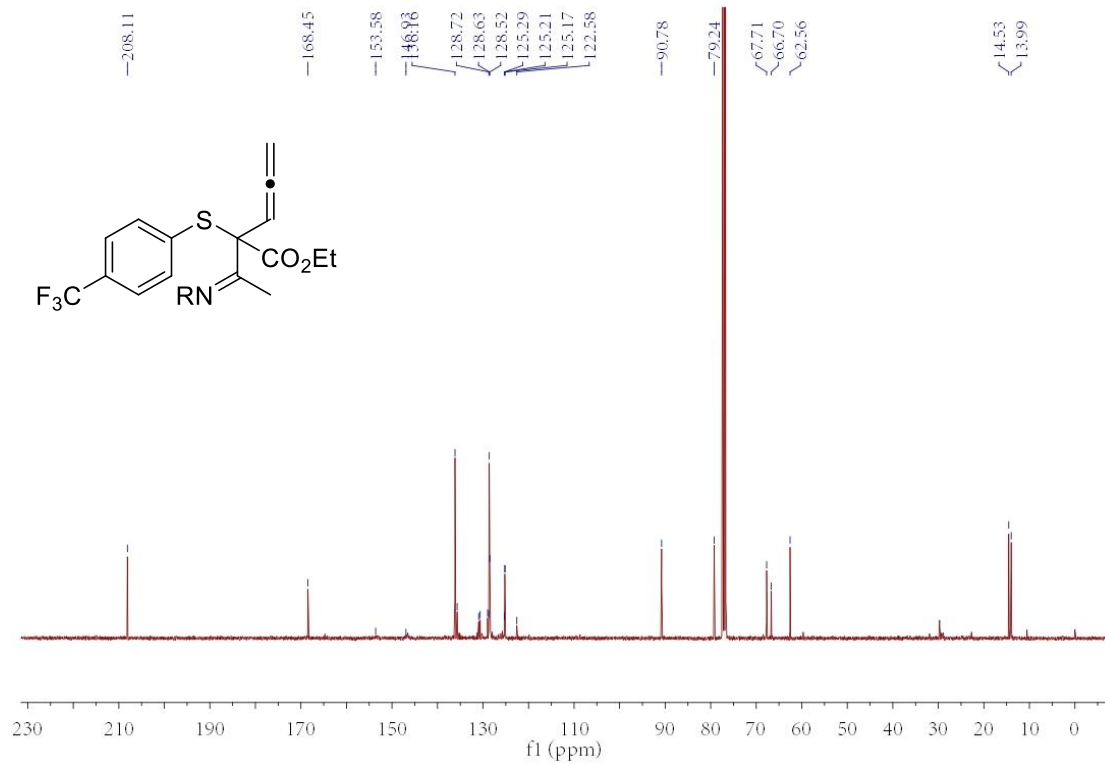

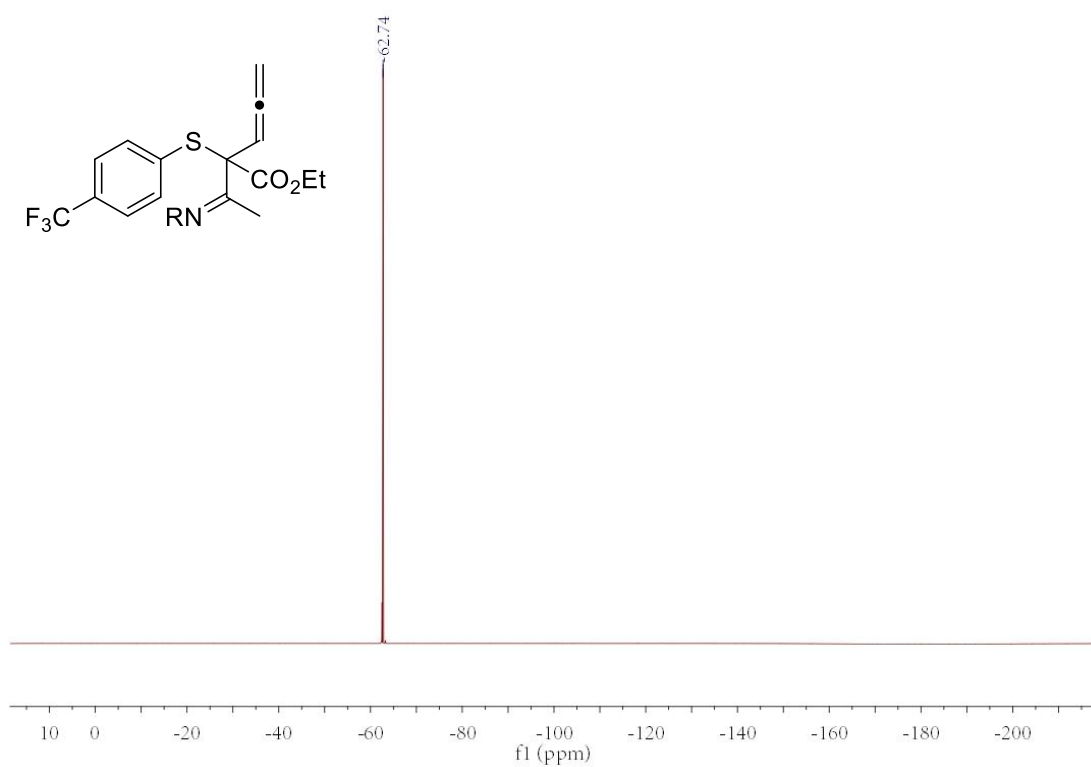

**3b'**, R=NHCO<sub>2</sub>Bn

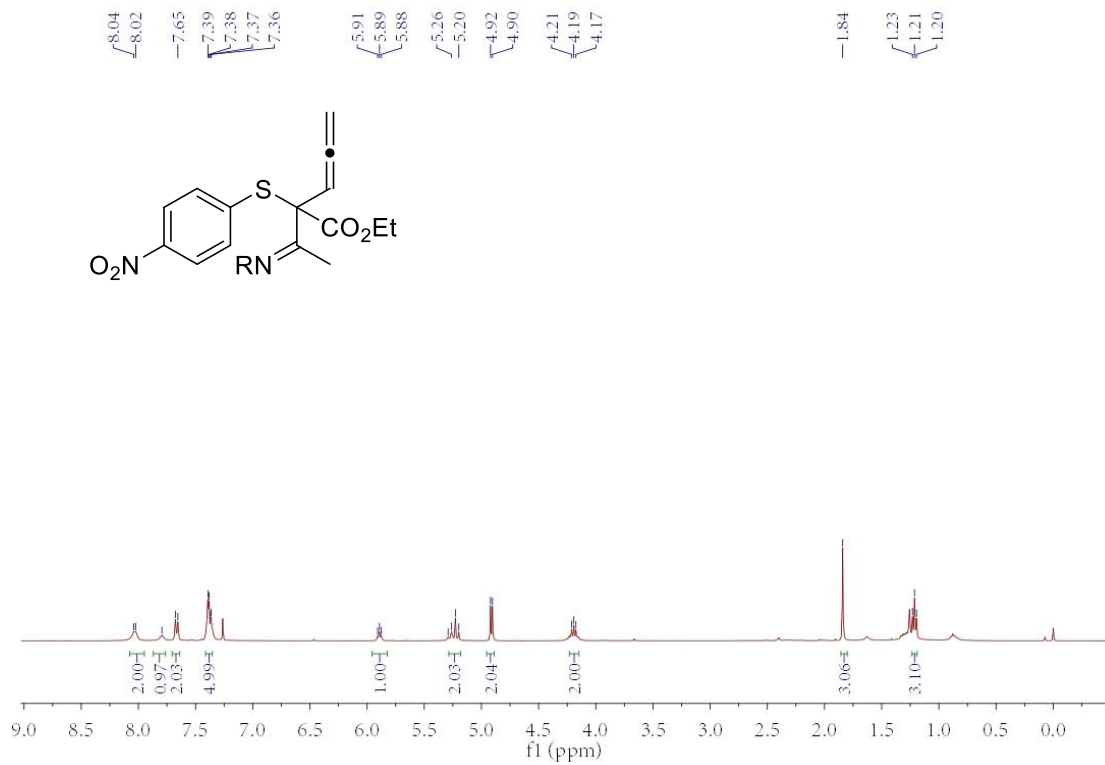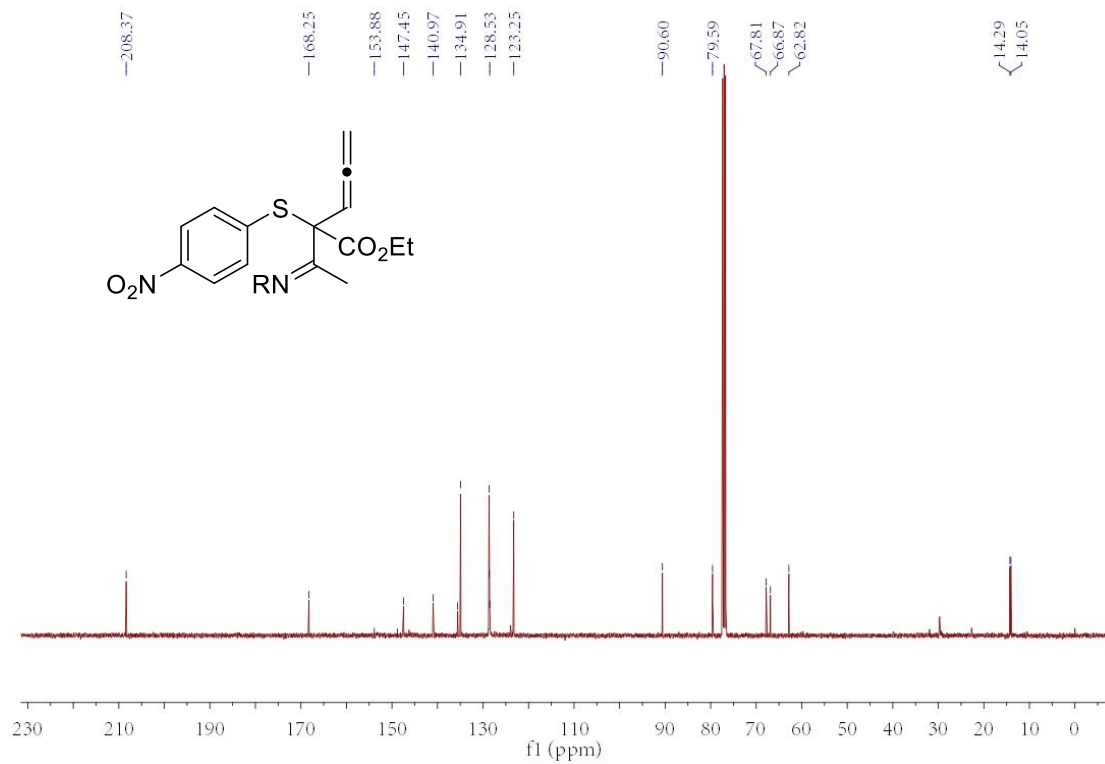

**3c'**, R=NHCO<sub>2</sub>Bn

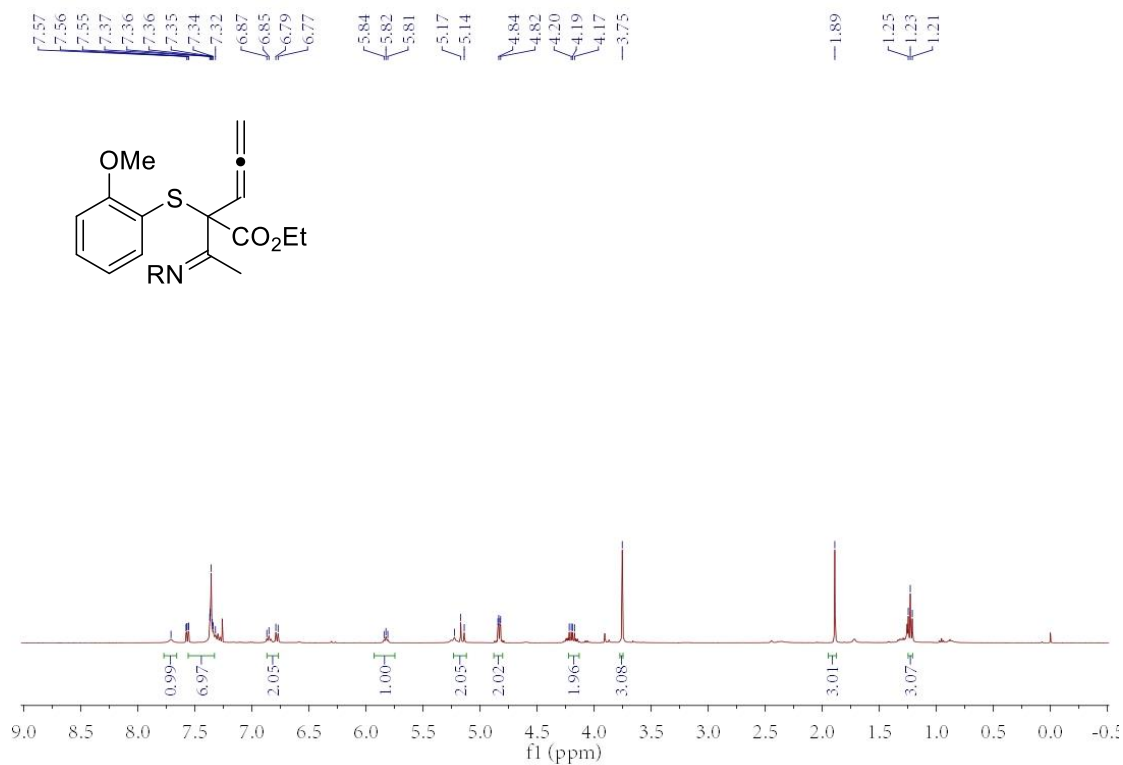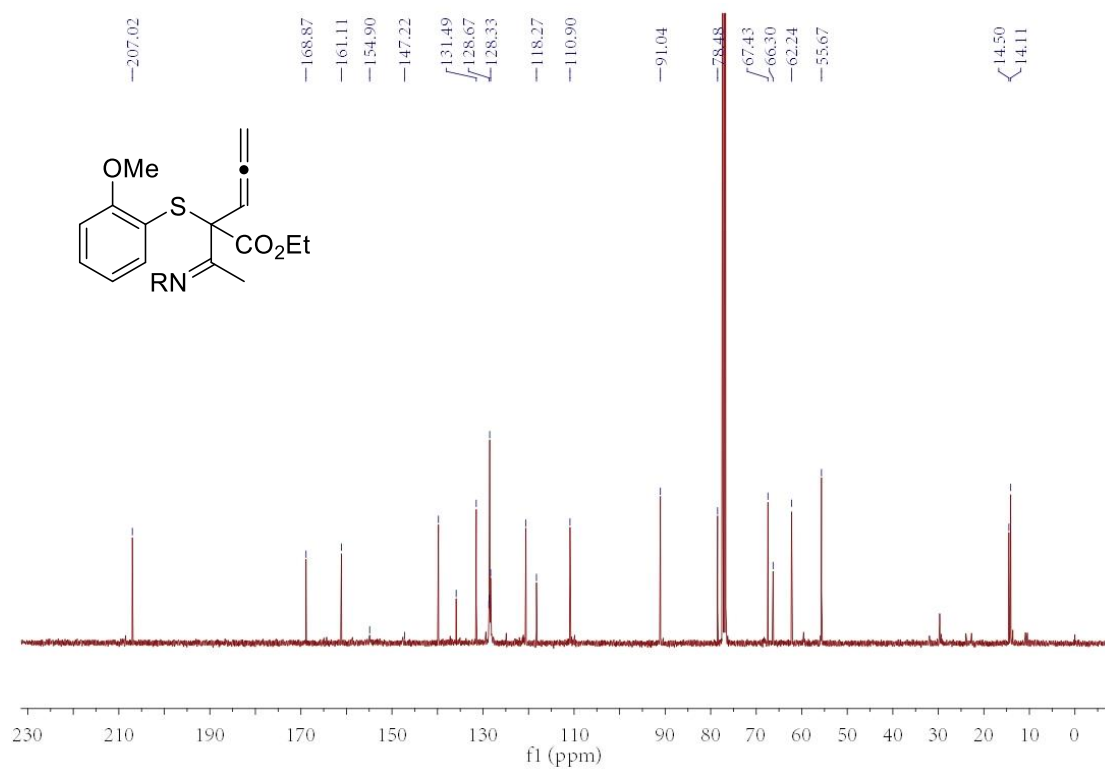

4

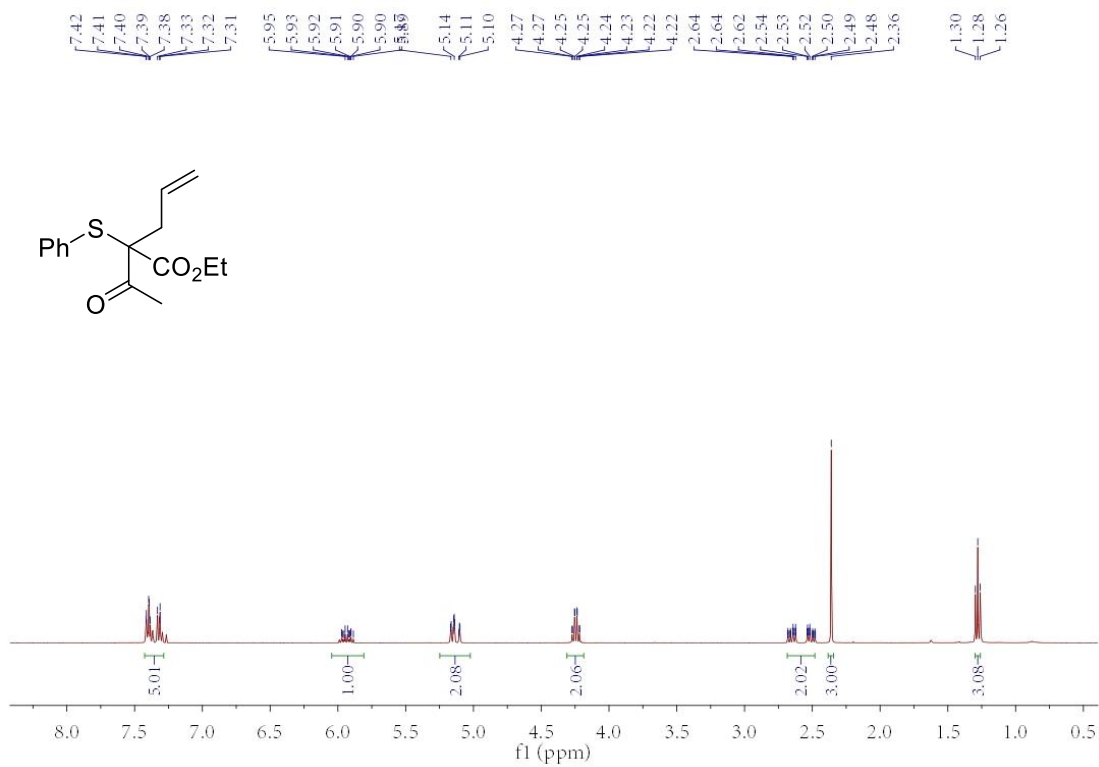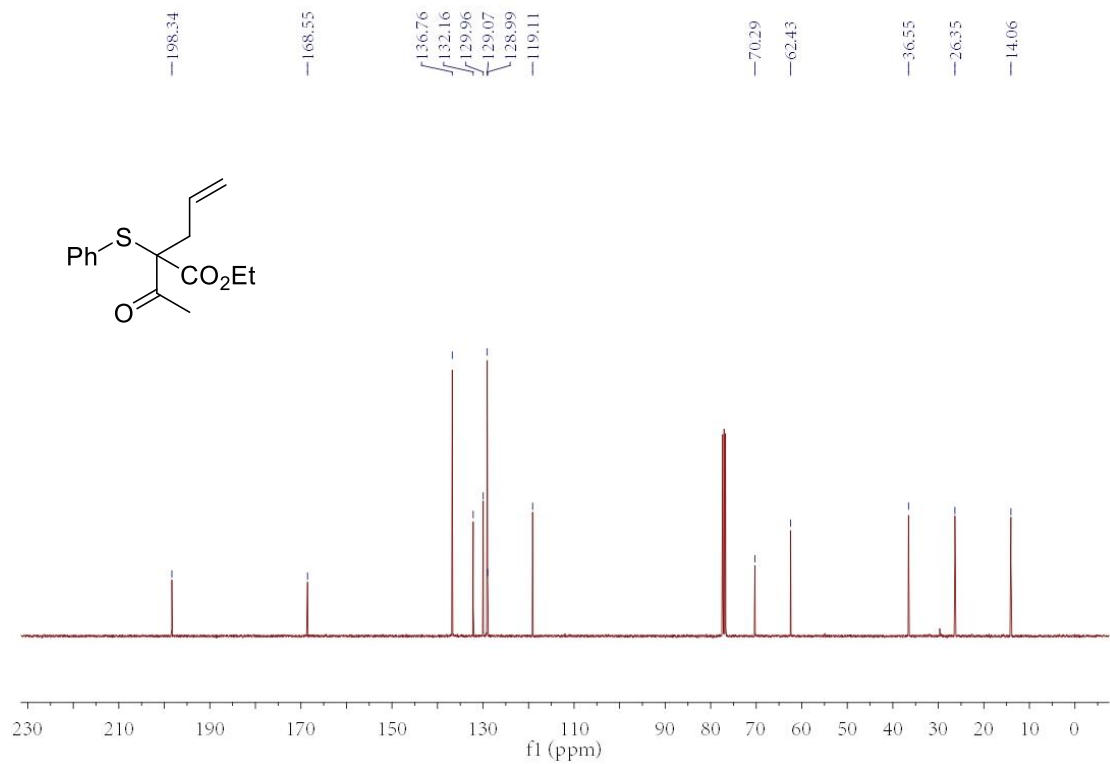

5

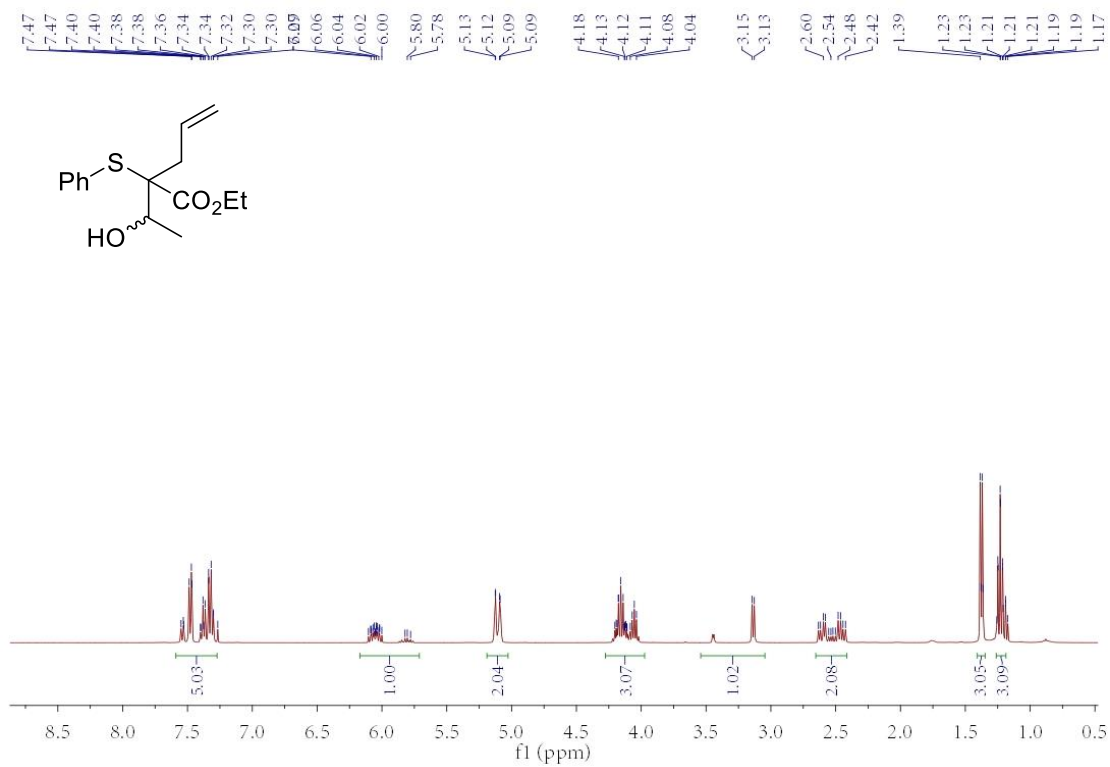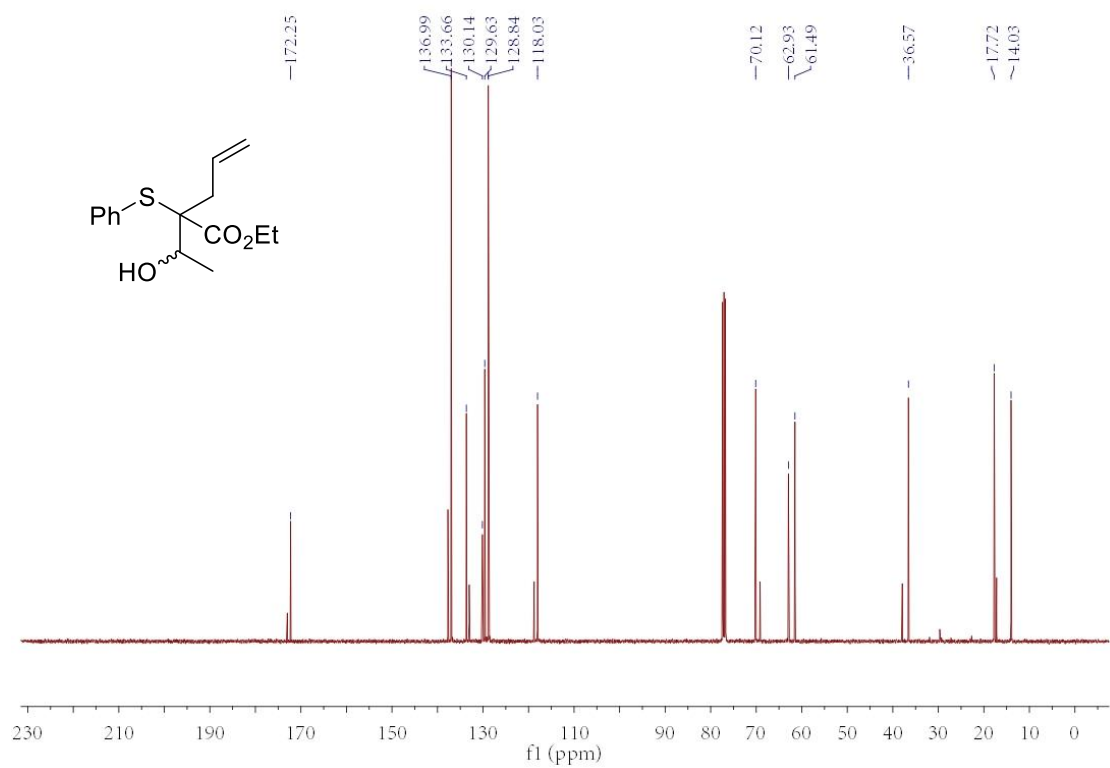

6

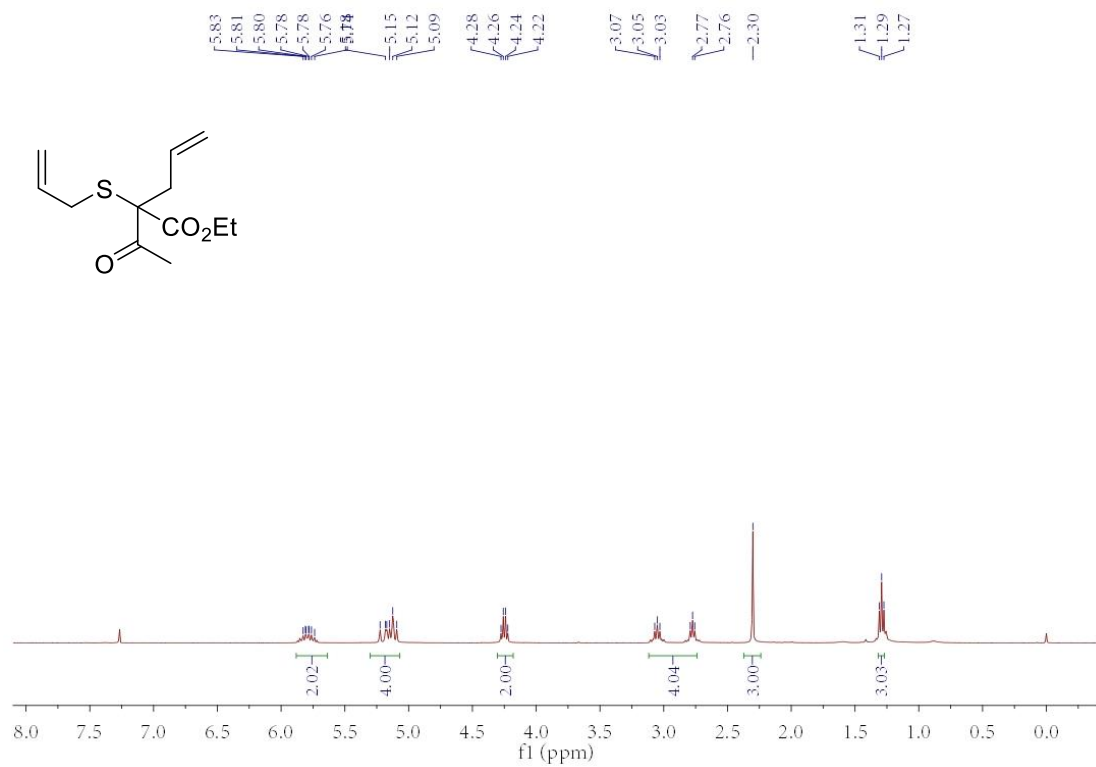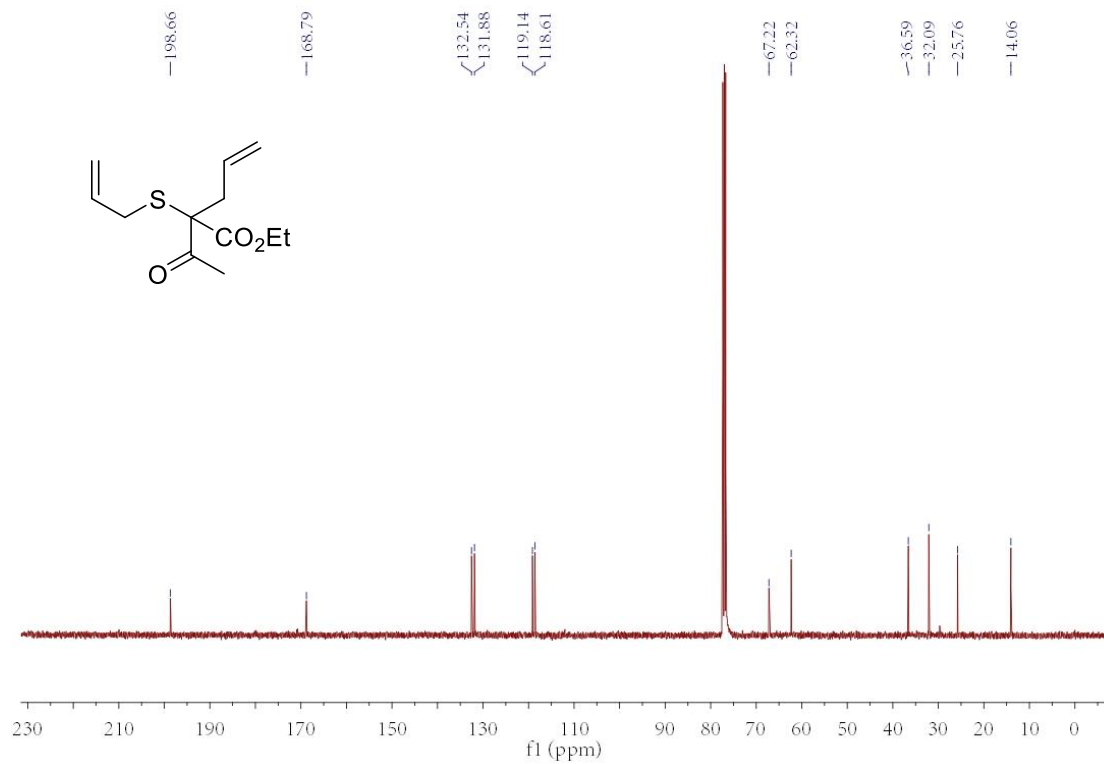

7

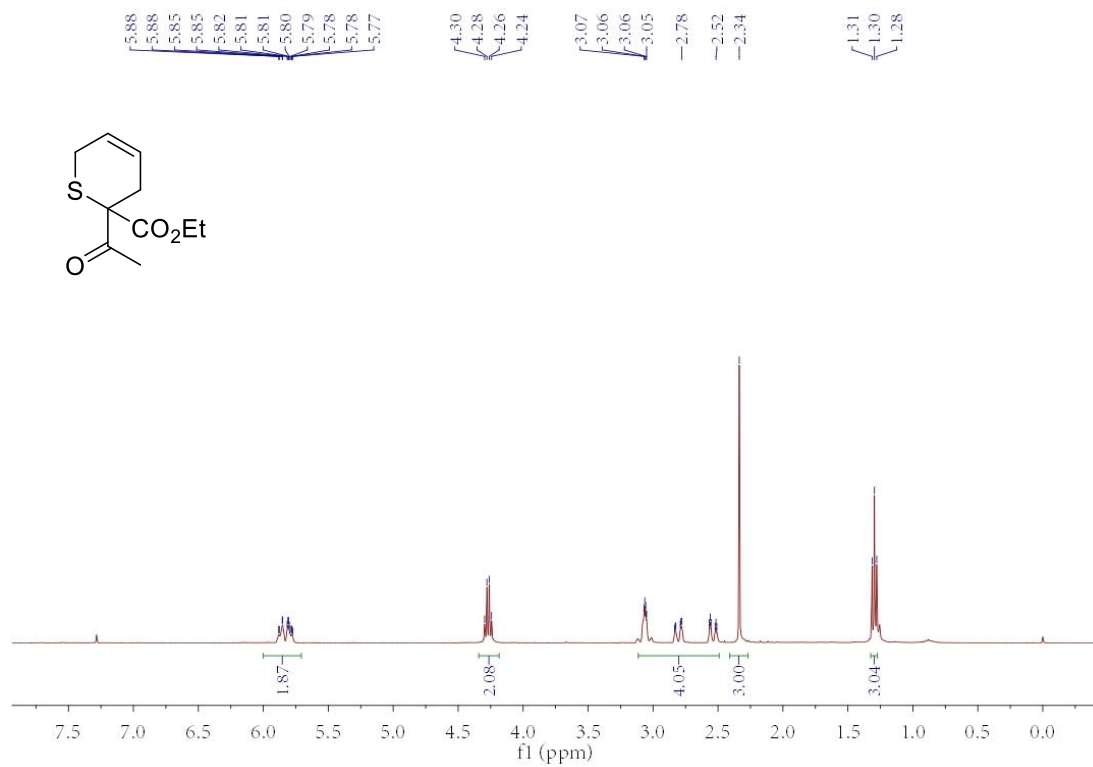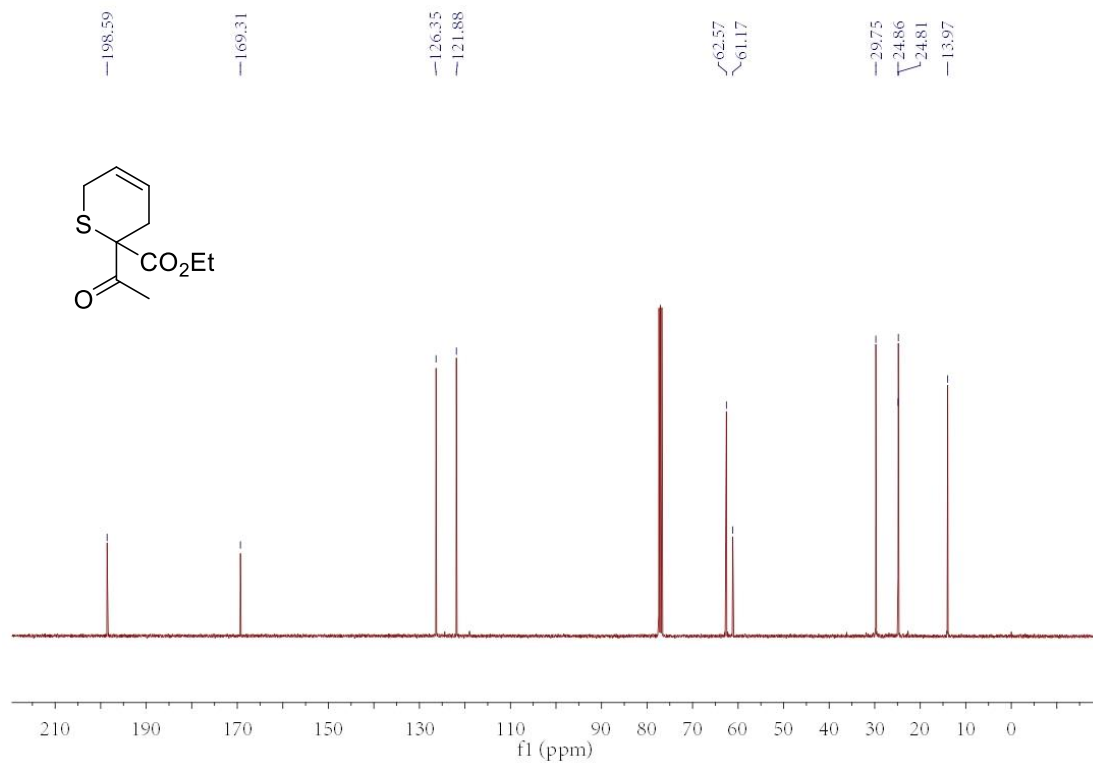



8

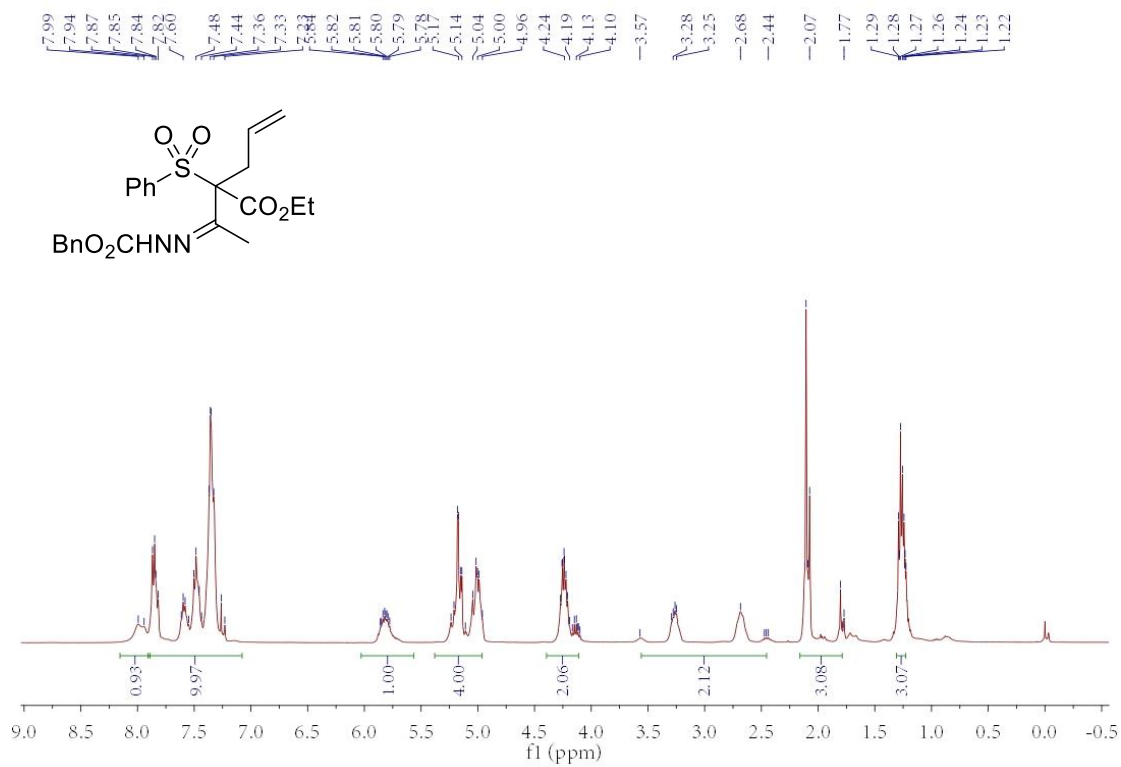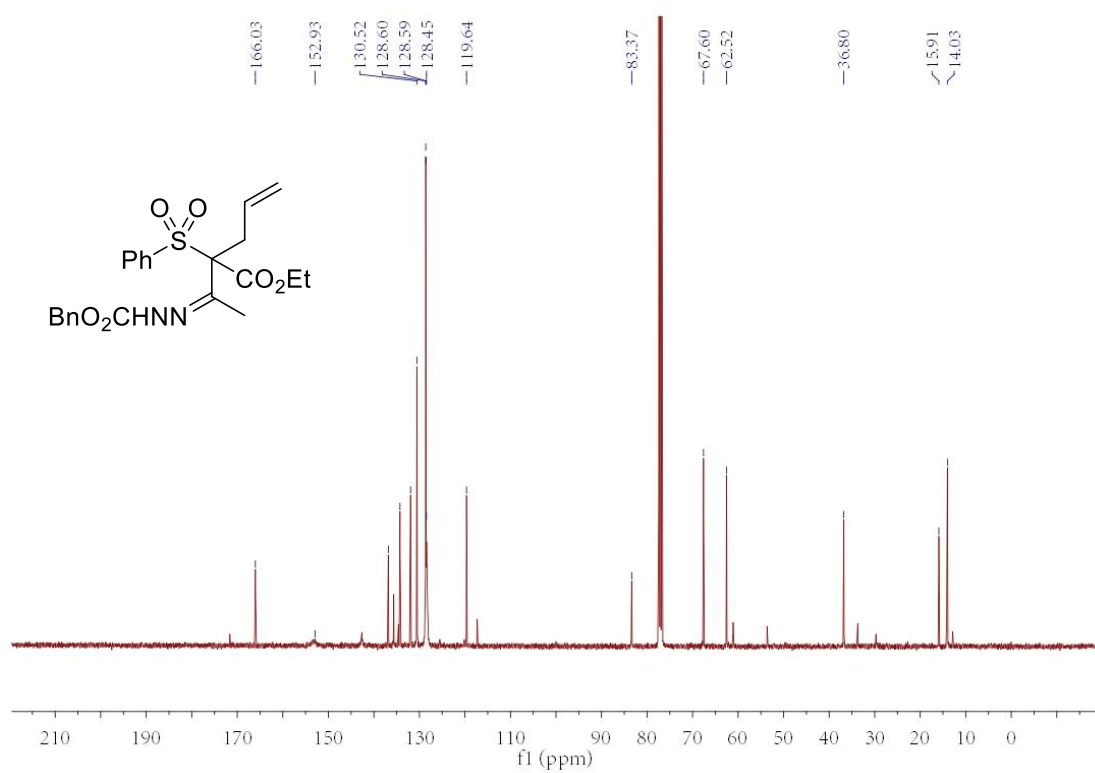

9

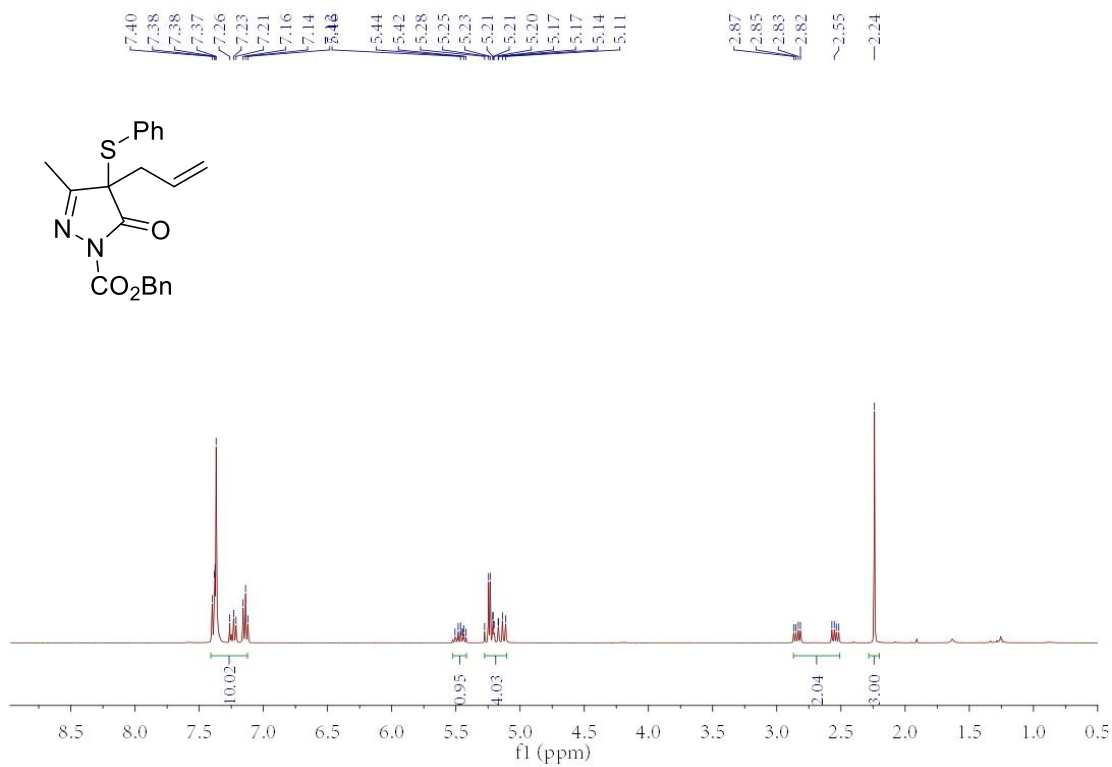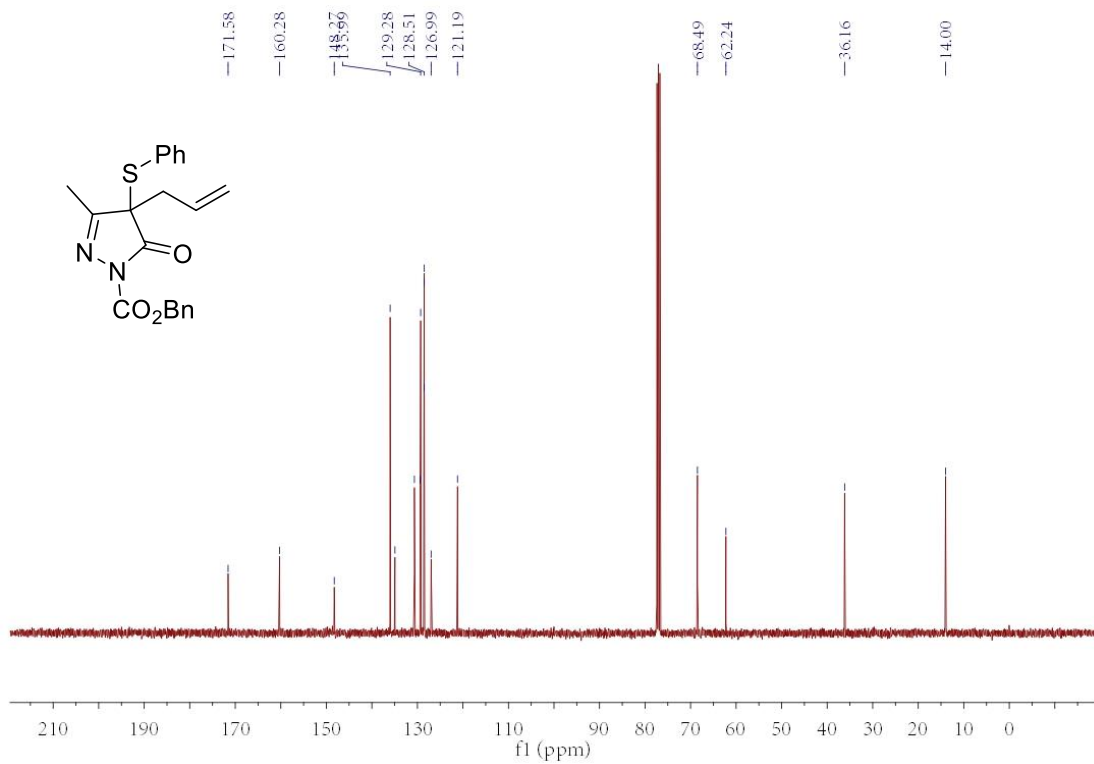

## 6. References

- [1] Nelson, A. M. Pereira; Américo Lemos; Arménio C. Serraa; Teresa M. V. D. Pinho e Melo. *Tetrahedron. Lett.* **2013**, *54*, 1553-1557.
- [2] Zhang X.-Y., Lin B., Chen J.-H., Chen J.-J., Luo Y.-S., and Xia Y.-Z. *Org. Lett.* **2021**, *23*, 3, 819–825.
- [3] Wagh, Sachin Bhausheb; Singh, Rahulkumar Rajmani; Sahani, Rajkumar Lalji; Liu, R.-S. *Org. Lett.* **2019**, *21*, 8, 2755–2758.
